# Supplementary material for: Elevated SLC40A1 impairs cardiac function and exacerbates mitochondrial dysfunction, oxidative stress, and apoptosis in ischemic myocardia
Source: PubMed Central journal article supplement (PMC10758104; doi:10.7150/ijbs.89368), 2024-01-01

## Supplementary materials

**Table S1**

The primer sequences used for quantitative PCR were as follows:

| Species | Gene            | Forward primer         | Reverse primer          |
|---------|-----------------|------------------------|-------------------------|
| Mouse   | <i>Bax</i>      | TGAAGACAGGGGCCTTTTTG   | AATTCGCCGGAGACTCG       |
| Mouse   | <i>Bcl2a1a</i>  | GGCTGAGCACTACCTTCAGTA  | TGGCGGTATCTATGGATTCCAC  |
| Mouse   | <i>Bcl2l1</i>   | AGTGGAGGTACACCCTCAG    | AAGGCTGGGATCACAAACGTG   |
| Mouse   | <i>Bnip3</i>    | TCCTGGGTAGAACTGCACTTC  | GCTGGGCATCCAACAGTATTT   |
| Mouse   | <i>Bok</i>      | AGGTAGTGTCCCTGTATTCCG  | AAGGTCTTGCCTACAACTCC    |
| Mouse   | <i>Gpx1</i>     | AGTCCACCGTGTATGCCTTCT  | GAGACGCGACATTCTCAATGA   |
| Mouse   | <i>Hmox1</i>    | GGTGATGGCTTCCTTGTACC   | AGTGAGGCCCATACCAGAAG    |
| Mouse   | <i>mt-col</i>   | TCGGAGCCCCAGATATAGCA   | TTCCGGCTAGAGGTGGGTA     |
| Mouse   | <i>mt-cytb</i>  | GGCTACGTCCTTCCATGAGG   | AGCGAAGAATCGGGTCAAGG    |
| Mouse   | <i>mt-nd1</i>   | TCCGAGCATCTTATCCACGC   | GTATGGTGGTACTCCCGCTG    |
| Mouse   | <i>Myh7</i>     | ACTGTCAACACTAAGAGGGTCA | TTGGATGATTTGATCTTCCAGGG |
| Mouse   | <i>Ndufs1</i>   | AGGATATGTTCGCACAACCTGG | TCATGGTAACAGAATCGAGGGA  |
| Mouse   | <i>Nppa</i>     | TGACAGGATTGGAGCCCAGAG  | AGCTGCGTGACACACCACAAG   |
| Mouse   | <i>Nppb</i>     | GCTGCTTTGGGCACAAGATAG  | GGTCTTCCTACAACAACCTCA   |
| Mouse   | <i>Opal</i>     | ACAGCAAATCAAGAGCACGA   | TTGCGCTTCTGTTGGGCAT     |
| Mouse   | <i>Ptgs2</i>    | CTGCGCCTTTTCAAGGATGG   | GGGGATACACCTCTCCACCA    |
| Mouse   | <i>Slc25a28</i> | AGCATTGCGTGATGTACCCG   | CCTGTTGCTGTGACGTTCA     |
| Mouse   | <i>Slc25a37</i> | CGGAGGATGGATGGGGACT    | GCTGGTCGGTAGGTTCTCGTA   |
| Mouse   | <i>Slc40a1</i>  | GTGGAGTACTTCTTGCTCTGG  | CTGCTTCAGTTCTGACTCCTC   |
| Mouse   | <i>Sod2</i>     | CAGACCTGCCTTACGACTATGG | CTCGGTGGCGTTGAGATTGTT   |
| Mouse   | <i>Srxn1</i>    | CCCAGGGTGGCGACTACTA    | GTGGACCTCACGAGCTTGG     |
| Mouse   | <i>Steap4</i>   | GGGAAGTCACTGGGATTGAAAA | CCGAATAGCTCAGGACCTCTG   |
| Mouse   | <i>Tfrc</i>     | CTCAGTTTCCGCCATCTCAGT  | GCAGCTCTTGAGATTGTTTGCA  |
| Mouse   | <i>Thbs1</i>    | GGGGAGATAACGGTGTGTTTG  | CGGGGATCAGGTTGGCATT     |
| Mouse   | <i>β-Actin</i>  | GTCCCTCACCTCCCAAAG     | GCTGCCTCAACACCTCAACCC   |

**Table S2**

Primary antibodies used for western blotting, immunoprecipitation, immunofluorescence, and immunohistochemistry were as follows:

| Antibody | Host   | Working dilutions       | Catalog No. | Supplier                      |
|----------|--------|-------------------------|-------------|-------------------------------|
| Flag     | Mouse  | WB: 1/1000<br>IP: 1/100 | MA1-91878   | Thermo Fisher Scientific, USA |
| Flag     | Rabbit | WB: 1/2000              | ab205606    | Abcam, UK                     |
| SLC40A1  | Rabbit | WB: 1/1000              | NBP1-21502  | Novus, USA                    |
| SLC40A1  | Mouse  | WB: 1/1000              | ab239583    | Abcam, UK                     |

|                |        |            |             |                    |  |
|----------------|--------|------------|-------------|--------------------|--|
|                |        |            | IHC: 1/100  |                    |  |
|                |        |            | IF: 1/100   |                    |  |
| Steap4         | Rabbit | WB: 1/500  | 11944-1-AP  | Proteintech, China |  |
|                |        | IP: 1/50   |             |                    |  |
|                |        | IHC: 1/50  |             |                    |  |
| Steap4         | Goat   | WB: 1/500  | NB100-68162 | Novus, USA         |  |
|                |        | IF: 1/100  |             |                    |  |
| Fth            | Rabbit | WB: 1/1000 | A19544      | ABclonal, China    |  |
| Hif2- $\alpha$ | Rabbit | WB: 1/1000 | A7553       | ABclonal, China    |  |
| Cox-IV         | Rabbit | WB: 1/5000 | 11242-1-AP  | Proteintech, China |  |
| Cytochrome c   | Rabbit | WB: 1/5000 | ab133504    | Abcam, UK          |  |
| $\beta$ -Actin | Rabbit | WB: 1/5000 | 81115-1-RR  | Proteintech, China |  |
| Gpx4           | Rabbit | WB: 1/1000 | A11243      | ABclonal, China    |  |

1

2 **Table S3**

3 shRNA target sequences were as follows:

| Target         | Species | Target sequences              |
|----------------|---------|-------------------------------|
| <i>Slc40a1</i> | Mouse   | GTGGATCCATCCTTAGTATTT         |
| <i>Steap4</i>  | Mouse   | CAGAGTCAAATGCGGAATA           |
| <i>Slc40a1</i> | Rat     | TCTTACACAAGAATGAGCTTCTGAA (1) |
| <i>Slc40a1</i> | Rat     | TAACATCCGTGAACTTGAATGTGAA (2) |
| <i>Slc40a1</i> | Rat     | CGAGATGGATGGGTCTCCTACTATA (3) |

4

5 **Table S4**

6 Mass spectrum analysis of Flag (SLC40A1)-interacting proteins

| Protein name | Unique peptides | Molecular mass (kDa) | Abundance         | MS score |
|--------------|-----------------|----------------------|-------------------|----------|
| SLC40A1      | 10              | 62.7                 | $2.3 \times 10^8$ | 41       |
| Steap4       | 5               | 53                   | $3.7 \times 10^6$ | 9        |
| Tfrc         | 5               | 85.7                 | $1.5 \times 10^6$ | 4        |
| Ndufs4       | 2               | 19.8                 | $8.5 \times 10^5$ | 6        |
| Abcb7        | 2               | 82.5                 | $2.4 \times 10^5$ | 0        |

7 Following Co-IP assays of TG mouse heart tissue and electrophoresis, the whole band (Flag-interacting  
8 proteins) assessed by LC-MS/MS. Tfrc, Transferrin receptor protein 1; Ndufs4, NADH dehydrogenase  
9 [ubiquinone] iron-sulfur protein 4, mitochondrial; Abcb7, Iron-sulfur clusters transporter Abcb7,  
10 mitochondrial.

11

12 **Table S5**

13 List of genes that were significantly up-regulated (Fold change > 0)/down-regulated (Fold change < 0) in  
14 TG mice compared to NTG mice based on RNA-seq analysis (Padj < 0.5)

| <b>Gene</b>      | <b>ID</b>          | <b>Fold change</b> | <b>Padj</b> |
|------------------|--------------------|--------------------|-------------|
| <i>Nmrk2</i>     | ENSMUSG00000004939 | 8.117495592        | 0           |
| <i>Postn</i>     | ENSMUSG00000027750 | 4.56749557         | 1.32E-74    |
| <i>Gdf15</i>     | ENSMUSG00000038508 | 5.608992285        | 2.72E-72    |
| <i>Asns</i>      | ENSMUSG00000029752 | 4.845394302        | 2.72E-72    |
| <i>Ctgf</i>      | ENSMUSG00000019997 | 3.852524426        | 5.09E-63    |
| <i>Slc40a1</i>   | ENSMUSG00000025993 | 3.472875306        | 1.55E-62    |
| <i>Col8a1</i>    | ENSMUSG00000068196 | 3.765430053        | 1.33E-52    |
| <i>Atf3</i>      | ENSMUSG00000026628 | 3.473179931        | 5.97E-52    |
| <i>Meox1</i>     | ENSMUSG00000001493 | 3.242655617        | 5.30E-51    |
| <i>Mthfd2</i>    | ENSMUSG00000005667 | 3.300745885        | 3.30E-42    |
| <i>Thbs1</i>     | ENSMUSG00000040152 | 3.677770777        | 1.89E-40    |
| <i>Cdkn1a</i>    | ENSMUSG00000023067 | 2.843242936        | 3.04E-40    |
| <i>Eln</i>       | ENSMUSG00000029675 | 2.91912677         | 1.83E-39    |
| <i>Rcan1</i>     | ENSMUSG00000022951 | 2.000307896        | 1.00E-38    |
| <i>Fhl1</i>      | ENSMUSG00000023092 | 2.196092801        | 1.82E-38    |
| <i>Timp1</i>     | ENSMUSG00000001131 | 3.975318782        | 1.31E-35    |
| <i>Tnc</i>       | ENSMUSG00000028364 | 5.238270091        | 1.68E-34    |
| <i>Phgdh</i>     | ENSMUSG00000053398 | 3.26872831         | 3.35E-34    |
| <i>Tfrc</i>      | ENSMUSG00000022797 | 2.984757092        | 8.96E-32    |
| <i>Col3a1</i>    | ENSMUSG00000026043 | 2.118238904        | 1.55E-30    |
| <i>Hmox1</i>     | ENSMUSG00000005413 | 2.266246653        | 2.87E-30    |
| <i>Lgals3</i>    | ENSMUSG00000050335 | 3.34316456         | 8.23E-30    |
| <i>Loxl2</i>     | ENSMUSG00000034205 | 2.521607813        | 1.29E-29    |
| <i>Uck2</i>      | ENSMUSG00000026558 | 2.441825395        | 2.27E-29    |
| <i>Tnfrsf12a</i> | ENSMUSG00000023905 | 2.704975841        | 1.36E-28    |
| <i>Adamts12</i>  | ENSMUSG00000036040 | 2.744419469        | 1.70E-28    |
| <i>Emp1</i>      | ENSMUSG00000030208 | 2.196201045        | 4.54E-28    |
| <i>Gm29216</i>   | ENSMUSG00000101249 | -2.610648509       | 4.55E-27    |
| <i>Abra</i>      | ENSMUSG00000042895 | 2.420241512        | 1.03E-26    |
| <i>Otud1</i>     | ENSMUSG00000043415 | 2.270436428        | 2.41E-26    |
| <i>Psat1</i>     | ENSMUSG00000024640 | 2.727379357        | 8.49E-26    |
| <i>Nr4a1</i>     | ENSMUSG00000023034 | 2.626090237        | 1.38E-25    |
| <i>Mfap5</i>     | ENSMUSG00000030116 | 2.707412893        | 3.91E-25    |
| <i>Ddit4</i>     | ENSMUSG00000020108 | 2.005292345        | 5.10E-25    |
| <i>Egln3</i>     | ENSMUSG00000035105 | 2.46871723         | 9.63E-25    |
| <i>Pycr1</i>     | ENSMUSG00000025140 | 3.595876973        | 1.28E-24    |
| <i>Fkbp5</i>     | ENSMUSG00000024222 | 1.875809062        | 9.13E-24    |
| <i>Sparc</i>     | ENSMUSG00000018593 | 2.110127471        | 4.13E-23    |
| <i>Tuba1a</i>    | ENSMUSG00000072235 | 1.809697335        | 4.28E-23    |

|                 |                    |              |          |
|-----------------|--------------------|--------------|----------|
| <i>Fbn1</i>     | ENSMUSG00000027204 | 2.487849683  | 6.45E-23 |
| <i>Fstl1</i>    | ENSMUSG00000022816 | 2.278901025  | 7.63E-23 |
| <i>Cebpd</i>    | ENSMUSG00000071637 | 2.013648875  | 1.18E-22 |
| <i>Col5a2</i>   | ENSMUSG00000026042 | 2.183033629  | 3.06E-22 |
| <i>Cyr61</i>    | ENSMUSG00000028195 | 2.031796172  | 3.42E-22 |
| <i>Gm13889</i>  | ENSMUSG00000087006 | 2.655410771  | 1.95E-21 |
| <i>Wisp2</i>    | ENSMUSG00000027656 | 2.431831737  | 1.95E-21 |
| <i>Tyms</i>     | ENSMUSG00000025747 | 3.00543714   | 2.82E-21 |
| <i>Dbn1</i>     | ENSMUSG00000034675 | 2.473087793  | 8.69E-21 |
| <i>Colla2</i>   | ENSMUSG00000029661 | 1.660053418  | 1.74E-20 |
| <i>Rflnb</i>    | ENSMUSG00000020846 | 1.655433681  | 1.95E-20 |
| <i>Col4a1</i>   | ENSMUSG00000031502 | 1.709711772  | 3.20E-20 |
| <i>Serpine1</i> | ENSMUSG00000037411 | 2.817375581  | 3.66E-20 |
| <i>Pclaf</i>    | ENSMUSG00000040204 | 4.042724322  | 5.66E-20 |
| <i>Nr4a3</i>    | ENSMUSG00000028341 | 4.0299369    | 6.48E-20 |
| <i>Colla1</i>   | ENSMUSG00000001506 | 1.674452839  | 4.60E-19 |
| <i>Sgk1</i>     | ENSMUSG00000019970 | 1.785017433  | 8.91E-19 |
| <i>Mfap4</i>    | ENSMUSG00000042436 | 2.211971972  | 8.91E-19 |
| <i>Oaf</i>      | ENSMUSG00000032014 | 1.71008253   | 9.31E-19 |
| <i>Hbegf</i>    | ENSMUSG00000024486 | 1.778233868  | 1.62E-18 |
| <i>Inmt</i>     | ENSMUSG00000003477 | -2.386909946 | 1.75E-18 |
| <i>Apold1</i>   | ENSMUSG00000090698 | 2.321757706  | 2.43E-18 |
| <i>Egr2</i>     | ENSMUSG00000037868 | 4.484918296  | 5.60E-18 |
| <i>Entpd5</i>   | ENSMUSG00000021236 | -1.77391649  | 7.37E-18 |
| <i>Clqtnf6</i>  | ENSMUSG00000022440 | 2.280506528  | 8.63E-18 |
| <i>Maff</i>     | ENSMUSG00000042622 | 2.221793096  | 9.44E-18 |
| <i>Phlda3</i>   | ENSMUSG00000041801 | 1.78751192   | 9.67E-18 |
| <i>Aspn</i>     | ENSMUSG00000021388 | 1.987810993  | 1.03E-17 |
| <i>Trib3</i>    | ENSMUSG00000032715 | 2.151958076  | 1.18E-17 |
| <i>Ptn</i>      | ENSMUSG00000029838 | 2.140089197  | 1.40E-17 |
| <i>Tubb6</i>    | ENSMUSG00000001473 | 1.614755365  | 1.49E-17 |
| <i>Sprr1a</i>   | ENSMUSG00000050359 | 6.127593852  | 2.15E-17 |
| <i>Ppl</i>      | ENSMUSG00000039457 | -2.111324319 | 3.23E-17 |
| <i>Spp1</i>     | ENSMUSG00000029304 | 4.01204838   | 3.68E-17 |
| <i>Gm49477</i>  | ENSMUSG00000116066 | -2.432555088 | 3.69E-17 |
| <i>Gal3st3</i>  | ENSMUSG00000047658 | -2.518152682 | 5.54E-17 |
| <i>Igf1</i>     | ENSMUSG00000020053 | 1.765006168  | 7.30E-17 |
| <i>Ivd</i>      | ENSMUSG00000027332 | -1.793960993 | 1.20E-16 |
| <i>Prelid1</i>  | ENSMUSG00000021486 | 1.475315086  | 1.45E-16 |
| <i>Pfkip</i>    | ENSMUSG00000021196 | 2.1498582    | 1.51E-16 |

|                      |                    |              |          |
|----------------------|--------------------|--------------|----------|
| <i>Atp6v1h</i>       | ENSMUSG00000033793 | 1.457308629  | 3.40E-16 |
| <i>Haus8</i>         | ENSMUSG00000035439 | 1.830560757  | 3.96E-16 |
| <i>Csrp2</i>         | ENSMUSG00000020186 | 2.060650328  | 4.53E-16 |
| <i>Col4a2</i>        | ENSMUSG00000031503 | 1.515177102  | 5.47E-16 |
| <i>Kdelr3</i>        | ENSMUSG00000010830 | 1.832464337  | 6.42E-16 |
| <i>Tpm4</i>          | ENSMUSG00000031799 | 1.517363756  | 6.46E-16 |
| <i>Ppip5k2</i>       | ENSMUSG00000040648 | -1.583851943 | 9.29E-16 |
| <i>Errfi1</i>        | ENSMUSG00000028967 | 2.22237854   | 1.31E-15 |
| <i>Tmsb10</i>        | ENSMUSG00000079523 | 1.630816988  | 1.82E-15 |
| <i>Cdk1</i>          | ENSMUSG00000019942 | 3.425120377  | 2.33E-15 |
| <i>Sars</i>          | ENSMUSG00000068739 | 1.419923462  | 2.53E-15 |
| <i>Sik1</i>          | ENSMUSG00000024042 | 1.971056368  | 2.58E-15 |
| <i>Mif</i>           | ENSMUSG00000033307 | 1.838017834  | 4.11E-15 |
| <i>Cngb3</i>         | ENSMUSG00000056494 | -3.679803989 | 5.51E-15 |
| <i>Myoc</i>          | ENSMUSG00000026697 | -2.204163932 | 6.28E-15 |
| <i>9230112J17Rik</i> | ENSMUSG00000111761 | -2.448752528 | 1.44E-14 |
| <i>Sphk1</i>         | ENSMUSG00000061878 | 3.029524048  | 1.88E-14 |
| <i>Cyb5r1</i>        | ENSMUSG00000026456 | 1.368820525  | 1.88E-14 |
| <i>Gdf6</i>          | ENSMUSG00000051279 | 3.206003313  | 1.95E-14 |
| <i>Dhdh</i>          | ENSMUSG00000011382 | -2.016650638 | 2.23E-14 |
| <i>Serp1b1c</i>      | ENSMUSG00000079049 | 5.232246153  | 3.11E-14 |
| <i>Anln</i>          | ENSMUSG00000036777 | 2.523117397  | 3.86E-14 |
| <i>Acot1</i>         | ENSMUSG00000072949 | -2.556733626 | 4.11E-14 |
| <i>Rgcc</i>          | ENSMUSG00000022018 | 1.430428408  | 5.42E-14 |
| <i>Gm10925</i>       | ENSMUSG00000100862 | -2.008978321 | 8.76E-14 |
| <i>Tubb2a</i>        | ENSMUSG00000058672 | 1.702381139  | 9.28E-14 |
| <i>Fah</i>           | ENSMUSG00000030630 | -1.790681407 | 1.01E-13 |
| <i>Vcan</i>          | ENSMUSG00000021614 | 1.936405874  | 1.02E-13 |
| <i>Plxnb1</i>        | ENSMUSG00000053646 | -2.635423682 | 1.05E-13 |
| <i>Xirp2</i>         | ENSMUSG00000027022 | 1.736187817  | 1.09E-13 |
| <i>Nnmt</i>          | ENSMUSG00000032271 | 1.679850093  | 1.11E-13 |
| <i>Bnip3</i>         | ENSMUSG00000078566 | 1.397733868  | 1.33E-13 |
| <i>Cyth3</i>         | ENSMUSG00000018001 | 1.530621653  | 1.39E-13 |
| <i>Ero1l</i>         | ENSMUSG00000021831 | 1.719582547  | 1.59E-13 |
| <i>Cabco1</i>        | ENSMUSG00000019945 | -2.368332236 | 2.23E-13 |
| <i>Col8a2</i>        | ENSMUSG00000056174 | 4.225435161  | 2.28E-13 |
| <i>Aldob</i>         | ENSMUSG00000028307 | -3.278950997 | 2.59E-13 |
| <i>Synpo2l</i>       | ENSMUSG00000039376 | 1.790956113  | 2.66E-13 |
| <i>11-Sep</i>        | ENSMUSG00000058013 | 1.45191982   | 2.74E-13 |
| <i>Egr3</i>          | ENSMUSG00000033730 | 3.461639189  | 3.06E-13 |

|                |                    |              |          |
|----------------|--------------------|--------------|----------|
| <i>Bok</i>     | ENSMUSG00000026278 | 1.727150983  | 3.07E-13 |
| <i>Itgbl1</i>  | ENSMUSG00000032925 | 1.796165459  | 3.11E-13 |
| <i>Anxa2</i>   | ENSMUSG00000032231 | 1.464742549  | 3.22E-13 |
| <i>Mmp14</i>   | ENSMUSG00000000957 | 1.872883816  | 4.01E-13 |
| <i>Tbx5</i>    | ENSMUSG00000018263 | -1.713117388 | 4.17E-13 |
| <i>Adhfe1</i>  | ENSMUSG00000025911 | -1.598261089 | 4.63E-13 |
| <i>Lpar1</i>   | ENSMUSG00000038668 | 1.703619189  | 5.03E-13 |
| <i>Ms4a7</i>   | ENSMUSG00000024672 | 2.03625247   | 5.62E-13 |
| <i>Loxl1</i>   | ENSMUSG00000032334 | 1.382925211  | 8.10E-13 |
| <i>Gstm1</i>   | ENSMUSG00000058135 | -1.327095894 | 8.79E-13 |
| <i>Armh4</i>   | ENSMUSG00000036242 | -1.983720612 | 8.97E-13 |
| <i>Fycol</i>   | ENSMUSG00000025241 | -1.849593425 | 8.97E-13 |
| <i>Tuba1b</i>  | ENSMUSG00000023004 | 1.277990381  | 9.38E-13 |
| <i>Tmem45a</i> | ENSMUSG00000022754 | 2.071894079  | 9.43E-13 |
| <i>Rbfox1</i>  | ENSMUSG00000008658 | -2.305031339 | 9.51E-13 |
| <i>Cilp</i>    | ENSMUSG00000042254 | 4.39949352   | 1.12E-12 |
| <i>C3</i>      | ENSMUSG00000024164 | -1.545387431 | 1.27E-12 |
| <i>Pbk</i>     | ENSMUSG00000022033 | 3.437547272  | 1.32E-12 |
| <i>S100a10</i> | ENSMUSG00000041959 | 1.515290181  | 1.32E-12 |
| <i>Tubb5</i>   | ENSMUSG00000001525 | 1.253814273  | 1.48E-12 |
| <i>Rhoc</i>    | ENSMUSG00000002233 | 1.419805216  | 1.76E-12 |
| <i>Coll2a1</i> | ENSMUSG00000032332 | 3.589358828  | 1.77E-12 |
| <i>Dclk3</i>   | ENSMUSG00000032500 | 3.457943615  | 1.79E-12 |
| <i>Il15</i>    | ENSMUSG00000031712 | -1.722432308 | 2.08E-12 |
| <i>Mxra7</i>   | ENSMUSG00000020814 | 1.439333583  | 3.41E-12 |
| <i>Abcc9</i>   | ENSMUSG00000030249 | -1.894081523 | 3.73E-12 |
| <i>Gm26917</i> | ENSMUSG00000097971 | 1.9717034    | 4.63E-12 |
| <i>Gm6416</i>  | ENSMUSG00000114792 | -3.033731734 | 5.70E-12 |
| <i>Dusp7</i>   | ENSMUSG00000053716 | -1.593002846 | 6.28E-12 |
| <i>Acad12</i>  | ENSMUSG00000042647 | -1.494523969 | 6.28E-12 |
| <i>Tpm2</i>    | ENSMUSG00000028464 | 1.732507931  | 6.28E-12 |
| <i>Gm4544</i>  | ENSMUSG00000116056 | -2.873690438 | 7.21E-12 |
| <i>Ppm1k</i>   | ENSMUSG00000037826 | -1.898731281 | 7.23E-12 |
| <i>Nts</i>     | ENSMUSG00000019890 | 2.455192799  | 7.63E-12 |
| <i>Mcm5</i>    | ENSMUSG00000005410 | 1.91588827   | 8.25E-12 |
| <i>Lox</i>     | ENSMUSG00000024529 | 3.875834615  | 8.82E-12 |
| <i>Cmya5</i>   | ENSMUSG00000047419 | -1.718256199 | 9.29E-12 |
| <i>Tubb2b</i>  | ENSMUSG00000045136 | 2.622385667  | 1.11E-11 |
| <i>Cldn5</i>   | ENSMUSG00000041378 | 1.628792959  | 1.33E-11 |
| <i>Gars</i>    | ENSMUSG00000029777 | 1.411127541  | 1.33E-11 |

|                  |                    |              |          |
|------------------|--------------------|--------------|----------|
| <i>Tpx2</i>      | ENSMUSG00000027469 | 2.640210751  | 1.41E-11 |
| <i>Anxa3</i>     | ENSMUSG00000029484 | 1.420059533  | 1.42E-11 |
| <i>Frzb</i>      | ENSMUSG00000027004 | 2.105172189  | 1.48E-11 |
| <i>Ano10</i>     | ENSMUSG00000037949 | -1.784401593 | 1.48E-11 |
| <i>Egflam</i>    | ENSMUSG00000042961 | -2.335382516 | 1.55E-11 |
| <i>Acox2</i>     | ENSMUSG00000021751 | 4.858947486  | 1.60E-11 |
| <i>Selenbp1</i>  | ENSMUSG00000068874 | -1.168666421 | 1.65E-11 |
| <i>Asb14</i>     | ENSMUSG00000021898 | -1.579243505 | 1.65E-11 |
| <i>Ccl9</i>      | ENSMUSG00000019122 | 1.402952026  | 1.66E-11 |
| <i>Gsn</i>       | ENSMUSG00000026879 | -1.476182148 | 1.67E-11 |
| <i>Pde4a</i>     | ENSMUSG00000032177 | -1.655132527 | 1.98E-11 |
| <i>Kcnj2</i>     | ENSMUSG00000041695 | -2.212258578 | 2.05E-11 |
| <i>Serp1</i>     | ENSMUSG00000027808 | 1.241412622  | 2.28E-11 |
| <i>Rps12-ps4</i> | ENSMUSG00000109509 | 1.621811425  | 2.28E-11 |
| <i>Nes</i>       | ENSMUSG00000004891 | 1.757435917  | 2.65E-11 |
| <i>Rpl3</i>      | ENSMUSG00000060036 | 1.522766486  | 2.87E-11 |
| <i>Rtn4</i>      | ENSMUSG00000020458 | 1.346564989  | 3.75E-11 |
| <i>Glpr2</i>     | ENSMUSG00000028480 | 1.631057611  | 3.81E-11 |
| <i>Eif4a1</i>    | ENSMUSG00000059796 | 1.04099584   | 3.81E-11 |
| <i>Ldha</i>      | ENSMUSG00000063229 | 1.540225253  | 3.81E-11 |
| <i>Capg</i>      | ENSMUSG00000056737 | 1.520161351  | 3.81E-11 |
| <i>Ankrd1</i>    | ENSMUSG00000024803 | 1.776662718  | 3.85E-11 |
| <i>Camk2a</i>    | ENSMUSG00000024617 | -2.078692272 | 4.43E-11 |
| <i>Bckdhb</i>    | ENSMUSG00000032263 | -1.341134688 | 5.67E-11 |
| <i>Rbm3</i>      | ENSMUSG00000031167 | 1.907718239  | 5.88E-11 |
| <i>Ms4a6d</i>    | ENSMUSG00000024679 | 1.717321555  | 6.02E-11 |
| <i>Bcl2l1</i>    | ENSMUSG00000007659 | 1.250873194  | 6.19E-11 |
| <i>Aox1</i>      | ENSMUSG00000063558 | -1.722306748 | 6.48E-11 |
| <i>Gm28439</i>   | ENSMUSG00000100131 | -2.021007853 | 6.80E-11 |
| <i>Bckdha</i>    | ENSMUSG00000060376 | -1.360256382 | 7.30E-11 |
| <i>Fscn1</i>     | ENSMUSG00000029581 | 1.379792852  | 7.63E-11 |
| <i>Ldhd</i>      | ENSMUSG00000031958 | -1.697276695 | 8.87E-11 |
| <i>Dynl11</i>    | ENSMUSG00000009013 | 1.497906438  | 8.90E-11 |
| <i>Dnajc28</i>   | ENSMUSG00000039763 | -2.150473343 | 9.00E-11 |
| <i>Idh2</i>      | ENSMUSG00000030541 | -1.031044299 | 9.59E-11 |
| <i>Arpc1b</i>    | ENSMUSG00000029622 | 1.312870759  | 9.71E-11 |
| <i>Coro1a</i>    | ENSMUSG00000030707 | 1.490835437  | 9.78E-11 |
| <i>Clec11a</i>   | ENSMUSG00000004473 | 2.389629889  | 9.90E-11 |
| <i>Anxa1</i>     | ENSMUSG00000024659 | 1.346395218  | 1.00E-10 |
| <i>Top2a</i>     | ENSMUSG00000020914 | 2.42896681   | 1.11E-10 |

|                      |                    |              |          |
|----------------------|--------------------|--------------|----------|
| <i>Pcnt</i>          | ENSMUSG00000001151 | -1.650316338 | 1.28E-10 |
| <i>Pmepal</i>        | ENSMUSG00000038400 | 1.362409176  | 1.56E-10 |
| <i>Fbp2</i>          | ENSMUSG00000021456 | -1.635664176 | 1.56E-10 |
| <i>E130119H09Rik</i> | ENSMUSG00000114069 | -2.892968403 | 1.72E-10 |
| <i>Lmna</i>          | ENSMUSG00000028063 | 1.103847599  | 1.79E-10 |
| <i>Atf4</i>          | ENSMUSG00000042406 | 1.320701471  | 1.80E-10 |
| <i>Hsp90aa1</i>      | ENSMUSG00000021270 | 1.50804298   | 2.17E-10 |
| <i>Vmn2r3</i>        | ENSMUSG00000091572 | 8.562155894  | 2.29E-10 |
| <i>Rpl3-ps1</i>      | ENSMUSG00000084349 | 1.439354076  | 2.43E-10 |
| <i>Lman1l</i>        | ENSMUSG00000056271 | 3.551987207  | 2.74E-10 |
| <i>Pgam1</i>         | ENSMUSG00000011752 | 1.131154962  | 2.81E-10 |
| <i>Slc25a42</i>      | ENSMUSG00000002346 | -1.785975429 | 2.86E-10 |
| <i>Gjal</i>          | ENSMUSG00000050953 | -1.141270737 | 2.90E-10 |
| <i>Csrp1</i>         | ENSMUSG00000026421 | 1.183193617  | 2.93E-10 |
| <i>Foxs1</i>         | ENSMUSG00000074676 | 2.391006048  | 3.10E-10 |
| <i>Aldh6a1</i>       | ENSMUSG00000021238 | -1.534658196 | 3.11E-10 |
| <i>Cars</i>          | ENSMUSG00000010755 | 1.288183132  | 3.98E-10 |
| <i>Hectd2os</i>      | ENSMUSG00000087579 | 2.006538743  | 4.18E-10 |
| <i>Tceal9</i>        | ENSMUSG00000042712 | 1.24380372   | 4.24E-10 |
| <i>Tpm3</i>          | ENSMUSG00000027940 | 1.114507058  | 4.24E-10 |
| <i>Dglucy</i>        | ENSMUSG00000021185 | -1.626080723 | 4.49E-10 |
| <i>Acy3</i>          | ENSMUSG00000024866 | -1.678974192 | 4.66E-10 |
| <i>Rhot2</i>         | ENSMUSG00000025733 | -1.374946825 | 4.74E-10 |
| <i>Lgals1</i>        | ENSMUSG00000068220 | 1.179819189  | 5.99E-10 |
| <i>Ms4a6b</i>        | ENSMUSG00000024677 | 1.330928388  | 6.24E-10 |
| <i>Adrb1</i>         | ENSMUSG00000035283 | -1.848200754 | 6.41E-10 |
| <i>Mylk3</i>         | ENSMUSG00000031698 | -1.206414445 | 6.46E-10 |
| <i>Stk17b</i>        | ENSMUSG00000026094 | 1.231727437  | 6.54E-10 |
| <i>Ptma</i>          | ENSMUSG00000026238 | 1.059842323  | 7.81E-10 |
| <i>Gstm7</i>         | ENSMUSG00000004035 | -1.501157336 | 7.93E-10 |
| <i>Eno1</i>          | ENSMUSG00000063524 | 1.364874044  | 7.98E-10 |
| <i>Cd63</i>          | ENSMUSG00000025351 | 1.155694029  | 8.85E-10 |
| <i>Stbd1</i>         | ENSMUSG00000047963 | 1.330713696  | 9.14E-10 |
| <i>Ifrd1</i>         | ENSMUSG00000001627 | 1.443263483  | 9.26E-10 |
| <i>Panx1</i>         | ENSMUSG00000031934 | 2.328782818  | 9.37E-10 |
| <i>Pln</i>           | ENSMUSG00000038583 | -1.458916395 | 9.52E-10 |
| <i>Pmm1</i>          | ENSMUSG00000022474 | 1.208562023  | 9.78E-10 |
| <i>Txlnb</i>         | ENSMUSG00000039891 | -1.225724861 | 1.03E-09 |
| <i>Thbs4</i>         | ENSMUSG00000021702 | 3.720445709  | 1.04E-09 |
| <i>Ccdc14l</i>       | ENSMUSG00000044033 | -1.183646806 | 1.04E-09 |



|                 |                    |              |          |
|-----------------|--------------------|--------------|----------|
| <i>Col26a1</i>  | ENSMUSG00000004415 | 4.072984991  | 1.06E-09 |
| <i>Abca4</i>    | ENSMUSG00000028125 | -2.775181654 | 1.27E-09 |
| <i>Ccna2</i>    | ENSMUSG00000027715 | 2.715828155  | 1.30E-09 |
| <i>Alpl</i>     | ENSMUSG00000028766 | 1.204343501  | 1.32E-09 |
| <i>Ctss</i>     | ENSMUSG00000038642 | 1.48431674   | 1.33E-09 |
| <i>Svep1</i>    | ENSMUSG00000028369 | 1.608693007  | 1.34E-09 |
| <i>Odc1</i>     | ENSMUSG00000011179 | 1.114872325  | 1.36E-09 |
| <i>Suclg2</i>   | ENSMUSG00000061838 | -1.160499725 | 1.43E-09 |
| <i>Etv4</i>     | ENSMUSG00000017724 | 3.292094387  | 1.47E-09 |
| <i>Lrrc15</i>   | ENSMUSG00000052316 | -2.683873502 | 1.48E-09 |
| <i>Tbc1d10c</i> | ENSMUSG00000040247 | -1.980853139 | 1.55E-09 |
| <i>Zdhhc20</i>  | ENSMUSG00000021969 | 1.24985723   | 1.55E-09 |
| <i>H2-Ab1</i>   | ENSMUSG00000073421 | 1.296778439  | 1.55E-09 |
| <i>Ereg</i>     | ENSMUSG00000029377 | 4.507934759  | 1.64E-09 |
| <i>Mov10l1</i>  | ENSMUSG00000015365 | -1.157687184 | 1.78E-09 |
| <i>Cytip</i>    | ENSMUSG00000026832 | 3.078030454  | 2.00E-09 |
| <i>Clec3b</i>   | ENSMUSG00000025784 | -1.183196426 | 2.01E-09 |
| <i>Inpp1l</i>   | ENSMUSG00000032737 | -1.262356641 | 2.08E-09 |
| <i>Aldh4a1</i>  | ENSMUSG00000028737 | -1.49628212  | 2.31E-09 |
| <i>Fgf16</i>    | ENSMUSG00000031230 | -1.316309439 | 2.31E-09 |
| <i>mt-Cytb</i>  | ENSMUSG00000064370 | -1.299085481 | 2.31E-09 |
| <i>Tacc3</i>    | ENSMUSG00000037313 | 2.3693115    | 2.35E-09 |
| <i>Slc25a34</i> | ENSMUSG00000040740 | -1.045875463 | 2.41E-09 |
| <i>Rbp7</i>     | ENSMUSG00000028996 | 1.446047092  | 2.44E-09 |
| <i>Uckl1os</i>  | ENSMUSG00000010492 | -4.20075733  | 2.49E-09 |
| <i>Whrn</i>     | ENSMUSG00000039137 | -2.192637354 | 2.87E-09 |
| <i>Mxd3</i>     | ENSMUSG00000021485 | 3.371228492  | 2.93E-09 |
| <i>Nrep</i>     | ENSMUSG00000042834 | 1.292874815  | 3.55E-09 |
| <i>Mrc2</i>     | ENSMUSG00000020695 | 1.272922686  | 3.55E-09 |
| <i>Gm24474</i>  | ENSMUSG00000114005 | -2.151162038 | 3.59E-09 |
| <i>Hmgb2</i>    | ENSMUSG00000054717 | 1.689671639  | 3.62E-09 |
| <i>Cdbl</i>     | ENSMUSG00000022235 | -1.570267925 | 3.64E-09 |
| <i>Picalm</i>   | ENSMUSG00000039361 | 1.111707272  | 3.92E-09 |
| <i>Kctd17</i>   | ENSMUSG00000033287 | 1.225876862  | 4.47E-09 |
| <i>Lsmem1</i>   | ENSMUSG00000071342 | -1.471534295 | 4.49E-09 |
| <i>Hmmr</i>     | ENSMUSG00000020330 | 4.463823733  | 4.85E-09 |
| <i>Sh3bgrl</i>  | ENSMUSG00000031246 | 1.048945304  | 4.97E-09 |
| <i>Medag</i>    | ENSMUSG00000029659 | 1.355197052  | 5.05E-09 |
| <i>Knstrn</i>   | ENSMUSG00000027331 | 2.548632622  | 5.12E-09 |
| <i>As3mt</i>    | ENSMUSG00000003559 | -1.899692704 | 5.17E-09 |

|                  |                    |              |          |
|------------------|--------------------|--------------|----------|
| <i>Mafk</i>      | ENSMUSG00000018143 | 1.210680889  | 5.20E-09 |
| <i>Kcnj11</i>    | ENSMUSG00000096146 | -1.187051512 | 5.28E-09 |
| <i>Penk</i>      | ENSMUSG00000045573 | -2.326313576 | 5.54E-09 |
| <i>Klf6</i>      | ENSMUSG00000000078 | 1.126536986  | 5.64E-09 |
| <i>Ckap2</i>     | ENSMUSG00000037725 | 3.021135264  | 6.10E-09 |
| <i>Rpl10-ps3</i> | ENSMUSG00000058443 | 1.510131781  | 6.28E-09 |
| <i>Cpeb3</i>     | ENSMUSG00000039652 | -1.423853504 | 6.46E-09 |
| <i>Aldh18a1</i>  | ENSMUSG00000025007 | 1.548098866  | 6.96E-09 |
| <i>Kcne4</i>     | ENSMUSG00000047330 | 2.278068027  | 7.09E-09 |
| <i>Ptx3</i>      | ENSMUSG00000027832 | 2.805453152  | 7.25E-09 |
| <i>Pabpc1</i>    | ENSMUSG00000022283 | 1.095645568  | 8.42E-09 |
| <i>Cdc42ep3</i>  | ENSMUSG00000036533 | -1.225764343 | 8.43E-09 |
| <i>Slc38a2</i>   | ENSMUSG00000022462 | 1.08494162   | 8.75E-09 |
| <i>Atp2a2</i>    | ENSMUSG00000029467 | -1.481329604 | 9.19E-09 |
| <i>Arf6</i>      | ENSMUSG00000044147 | 1.054991361  | 9.35E-09 |
| <i>Spry1</i>     | ENSMUSG00000037211 | 1.397059289  | 1.04E-08 |
| <i>Litaf</i>     | ENSMUSG00000022500 | 1.159661437  | 1.09E-08 |
| <i>Map3k20</i>   | ENSMUSG00000004085 | -1.143859176 | 1.11E-08 |
| <i>Actb</i>      | ENSMUSG00000029580 | 1.013530866  | 1.18E-08 |
| <i>Gm20619</i>   | ENSMUSG00000093482 | -2.227015677 | 1.19E-08 |
| <i>Klhdc1</i>    | ENSMUSG00000051890 | -1.597766512 | 1.19E-08 |
| <i>P4ha1</i>     | ENSMUSG00000019916 | 1.046419732  | 1.24E-08 |
| <i>Gm34302</i>   | ENSMUSG00000103476 | -2.849269596 | 1.26E-08 |
| <i>S100a16</i>   | ENSMUSG00000074457 | 1.085701783  | 1.32E-08 |
| <i>Nars</i>      | ENSMUSG00000024587 | 1.022651249  | 1.39E-08 |
| <i>Cfl1</i>      | ENSMUSG00000056201 | 1.152143909  | 1.55E-08 |
| <i>Pls3</i>      | ENSMUSG00000016382 | 1.086169461  | 1.67E-08 |
| <i>Nr1d1</i>     | ENSMUSG00000020889 | -1.105072754 | 1.74E-08 |
| <i>Corin</i>     | ENSMUSG00000005220 | -1.239134533 | 1.75E-08 |
| <i>Hadh</i>      | ENSMUSG00000027984 | -1.079810795 | 1.75E-08 |
| <i>Ccnb1</i>     | ENSMUSG00000041431 | 3.599071559  | 1.77E-08 |
| <i>Ngef</i>      | ENSMUSG00000026259 | 3.208663189  | 1.78E-08 |
| <i>Racgap1</i>   | ENSMUSG00000023015 | 2.198902117  | 1.78E-08 |
| <i>Yars</i>      | ENSMUSG00000028811 | 1.141417972  | 1.87E-08 |
| <i>Scara5</i>    | ENSMUSG00000022032 | -1.436955593 | 1.87E-08 |
| <i>Actr3</i>     | ENSMUSG00000026341 | 0.971425329  | 1.98E-08 |
| <i>Mcm6</i>      | ENSMUSG00000026355 | 1.450775708  | 1.99E-08 |
| <i>Clic1</i>     | ENSMUSG00000007041 | 1.114294066  | 1.99E-08 |
| <i>Mcam</i>      | ENSMUSG00000032135 | 1.370916367  | 2.03E-08 |
| <i>Cryba4</i>    | ENSMUSG00000066975 | -1.808966818 | 2.17E-08 |

|                      |                    |              |          |
|----------------------|--------------------|--------------|----------|
| <i>Cacng6</i>        | ENSMUSG00000078815 | -4.315988295 | 2.26E-08 |
| <i>Osbp2</i>         | ENSMUSG00000020435 | -1.886620724 | 2.32E-08 |
| <i>Pdk2</i>          | ENSMUSG00000038967 | -1.069364128 | 2.34E-08 |
| <i>Prss23</i>        | ENSMUSG00000039405 | 1.607192494  | 2.81E-08 |
| <i>Ect2</i>          | ENSMUSG00000027699 | 2.635812302  | 2.81E-08 |
| <i>Col9a2</i>        | ENSMUSG00000028626 | 4.199147129  | 2.81E-08 |
| <i>Tmem143</i>       | ENSMUSG00000002781 | -1.156884213 | 2.85E-08 |
| <i>Selenof</i>       | ENSMUSG00000037072 | 1.044381895  | 2.85E-08 |
| <i>Ppp1r14c</i>      | ENSMUSG00000040653 | -1.109288297 | 2.89E-08 |
| <i>Ptpn3</i>         | ENSMUSG00000038764 | -1.36366362  | 2.90E-08 |
| <i>2610524H06Rik</i> | ENSMUSG00000092486 | 2.4704626    | 2.92E-08 |
| <i>Rnd3</i>          | ENSMUSG00000017144 | 1.368306832  | 3.00E-08 |
| <i>Anxa5</i>         | ENSMUSG00000027712 | 0.991420339  | 3.02E-08 |
| <i>Asb15</i>         | ENSMUSG00000029685 | -1.749238112 | 3.08E-08 |
| <i>Rap1b</i>         | ENSMUSG00000052681 | 1.001536103  | 3.27E-08 |
| <i>Kdelr2</i>        | ENSMUSG00000079111 | 1.124684615  | 3.54E-08 |
| <i>Jpt1</i>          | ENSMUSG00000020737 | 1.152226579  | 3.64E-08 |
| <i>Atcayos</i>       | ENSMUSG00000085779 | -1.428870514 | 3.66E-08 |
| <i>Gja3</i>          | ENSMUSG00000048582 | -1.450538838 | 3.66E-08 |
| <i>Coq9</i>          | ENSMUSG00000031782 | -1.007582523 | 3.72E-08 |
| <i>Tfpi</i>          | ENSMUSG00000027082 | -1.031681412 | 3.82E-08 |
| <i>Ada</i>           | ENSMUSG00000017697 | 2.577398542  | 3.85E-08 |
| <i>mt-Atp6</i>       | ENSMUSG00000064357 | -2.821679402 | 4.08E-08 |
| <i>BC028528</i>      | ENSMUSG00000038543 | 1.617634083  | 4.26E-08 |
| <i>Pgk1</i>          | ENSMUSG00000062070 | 1.174263813  | 4.44E-08 |
| <i>Gm10635</i>       | ENSMUSG00000111765 | -3.675888905 | 4.45E-08 |
| <i>A430046D13Rik</i> | ENSMUSG00000097353 | -1.408239942 | 4.51E-08 |
| <i>Eif6</i>          | ENSMUSG00000027613 | 1.03563277   | 4.77E-08 |
| <i>Rai14</i>         | ENSMUSG00000022246 | 1.598287861  | 4.78E-08 |
| <i>Mdga1</i>         | ENSMUSG00000043557 | -2.018188985 | 4.82E-08 |
| <i>Hopx</i>          | ENSMUSG00000059325 | -1.302793327 | 4.91E-08 |
| <i>Tppp</i>          | ENSMUSG00000021573 | -1.335925854 | 4.99E-08 |
| <i>Slc2a1</i>        | ENSMUSG00000028645 | 1.394838603  | 5.32E-08 |
| <i>Prc1</i>          | ENSMUSG00000038943 | 2.972217734  | 5.32E-08 |
| <i>Bcl2a1b</i>       | ENSMUSG00000089929 | 3.409056498  | 5.59E-08 |
| <i>Pm20d1</i>        | ENSMUSG00000042251 | -2.822383445 | 5.61E-08 |
| <i>Rbp1</i>          | ENSMUSG00000046402 | 1.643889764  | 5.76E-08 |
| <i>Carhsp1</i>       | ENSMUSG00000008393 | 1.106128905  | 5.98E-08 |
| <i>4930438A08Rik</i> | ENSMUSG00000069873 | 7.917579484  | 6.18E-08 |
| <i>D2hgdh</i>        | ENSMUSG00000073609 | -1.379295888 | 6.22E-08 |

|                      |                    |              |          |
|----------------------|--------------------|--------------|----------|
| <i>Enpp1</i>         | ENSMUSG00000037370 | 1.726484621  | 6.22E-08 |
| <i>Ift81</i>         | ENSMUSG00000029469 | -1.585152995 | 6.25E-08 |
| <i>Mthfd11</i>       | ENSMUSG00000040675 | 1.915872777  | 6.31E-08 |
| <i>Gm43672</i>       | ENSMUSG00000106019 | -1.302893763 | 6.53E-08 |
| <i>Slc7a5</i>        | ENSMUSG00000040010 | 2.170275436  | 6.62E-08 |
| <i>Dsg2</i>          | ENSMUSG00000044393 | -1.476810937 | 7.16E-08 |
| <i>Mical2</i>        | ENSMUSG00000038244 | 1.427386086  | 7.18E-08 |
| <i>Crhr2</i>         | ENSMUSG00000003476 | -1.648720925 | 7.40E-08 |
| <i>Adamts8</i>       | ENSMUSG00000031994 | 3.146970039  | 7.59E-08 |
| <i>Nedd9</i>         | ENSMUSG00000021365 | 1.411472794  | 7.97E-08 |
| <i>Depp1</i>         | ENSMUSG00000048489 | 1.36330161   | 8.24E-08 |
| <i>Dbt</i>           | ENSMUSG00000000340 | -1.39264822  | 8.52E-08 |
| <i>Efcab2</i>        | ENSMUSG00000026495 | -1.212947965 | 8.70E-08 |
| <i>Acot9</i>         | ENSMUSG00000025287 | 1.079173621  | 9.32E-08 |
| <i>Prr12</i>         | ENSMUSG00000046574 | -1.675536106 | 9.37E-08 |
| <i>Rpsa-ps10</i>     | ENSMUSG00000047676 | 1.013317852  | 9.57E-08 |
| <i>Echdc3</i>        | ENSMUSG00000039063 | -1.427303502 | 9.57E-08 |
| <i>Tubb4b</i>        | ENSMUSG00000036752 | 0.905436241  | 9.58E-08 |
| <i>Dok1</i>          | ENSMUSG00000068335 | 2.006759223  | 9.70E-08 |
| <i>Lrrc3b</i>        | ENSMUSG00000045201 | -1.396099229 | 9.80E-08 |
| <i>Gm10222</i>       | ENSMUSG00000067736 | -2.479558908 | 9.89E-08 |
| <i>Cyb561</i>        | ENSMUSG00000019590 | 1.246596113  | 9.89E-08 |
| <i>Hnmt</i>          | ENSMUSG00000026986 | -1.570188875 | 1.00E-07 |
| <i>Jmjd6</i>         | ENSMUSG00000056962 | 1.00991841   | 1.03E-07 |
| <i>Ddx39</i>         | ENSMUSG00000005481 | 1.088900805  | 1.03E-07 |
| <i>Kcnip2</i>        | ENSMUSG00000025221 | -1.698980043 | 1.04E-07 |
| <i>Mki67</i>         | ENSMUSG00000031004 | 1.850086628  | 1.11E-07 |
| <i>Etl4</i>          | ENSMUSG00000036617 | -1.414607854 | 1.12E-07 |
| <i>Ccnb2</i>         | ENSMUSG00000032218 | 3.045717899  | 1.12E-07 |
| <i>Vim</i>           | ENSMUSG00000026728 | 1.117022987  | 1.13E-07 |
| <i>H2-Eb1</i>        | ENSMUSG00000060586 | 1.252099092  | 1.16E-07 |
| <i>Srsf3</i>         | ENSMUSG00000071172 | 0.98874174   | 1.18E-07 |
| <i>Calm1</i>         | ENSMUSG00000001175 | 0.878217807  | 1.22E-07 |
| <i>Ifi211</i>        | ENSMUSG00000026536 | 1.36089142   | 1.23E-07 |
| <i>Ube2c</i>         | ENSMUSG00000001403 | 2.536036444  | 1.24E-07 |
| <i>2310039L15Rik</i> | ENSMUSG00000100550 | -2.201106114 | 1.24E-07 |
| <i>Tnfrsf11b</i>     | ENSMUSG00000063727 | 4.233880394  | 1.25E-07 |
| <i>Npr3</i>          | ENSMUSG00000022206 | -1.056897283 | 1.25E-07 |
| <i>Cbx7</i>          | ENSMUSG00000053411 | -1.27869521  | 1.28E-07 |
| <i>Prkaca</i>        | ENSMUSG00000005469 | -0.893072595 | 1.29E-07 |

|                   |                    |              |          |
|-------------------|--------------------|--------------|----------|
| <i>Slfn2</i>      | ENSMUSG00000072620 | 1.20626714   | 1.29E-07 |
| <i>Rap1gap2</i>   | ENSMUSG00000038807 | -1.177816284 | 1.31E-07 |
| <i>Enpp2</i>      | ENSMUSG00000022425 | -1.632158518 | 1.31E-07 |
| <i>Ckap4</i>      | ENSMUSG00000046841 | 1.105612636  | 1.34E-07 |
| <i>Gstk1</i>      | ENSMUSG00000029864 | -1.636796726 | 1.38E-07 |
| <i>Nfil3</i>      | ENSMUSG00000056749 | 1.432258298  | 1.41E-07 |
| <i>Yipf5</i>      | ENSMUSG00000024487 | 1.120900942  | 1.42E-07 |
| <i>Upk3b</i>      | ENSMUSG00000042985 | -1.225821045 | 1.46E-07 |
| <i>Asb5</i>       | ENSMUSG00000031519 | -1.231939772 | 1.47E-07 |
| <i>Igfbp7</i>     | ENSMUSG00000036256 | 1.450098108  | 1.49E-07 |
| <i>Aldh1a3</i>    | ENSMUSG00000015134 | 2.259025568  | 1.56E-07 |
| <i>Cald1</i>      | ENSMUSG00000029761 | 1.05983205   | 1.56E-07 |
| <i>Gm10275</i>    | ENSMUSG00000069682 | 1.2406467    | 1.56E-07 |
| <i>Marcks</i>     | ENSMUSG00000069662 | 0.975172509  | 1.68E-07 |
| <i>Actg1</i>      | ENSMUSG00000062825 | 0.933311914  | 1.68E-07 |
| <i>Rpl35a-ps2</i> | ENSMUSG00000081214 | 1.458857744  | 1.68E-07 |
| <i>Morf4l2</i>    | ENSMUSG00000031422 | 0.939707691  | 1.79E-07 |
| <i>Cgnl1</i>      | ENSMUSG00000032232 | -0.952450327 | 1.95E-07 |
| <i>Clasp1</i>     | ENSMUSG00000064302 | -1.218235895 | 1.95E-07 |
| <i>Frmpp3</i>     | ENSMUSG00000042425 | -2.464777328 | 1.96E-07 |
| <i>SI00a6</i>     | ENSMUSG00000001025 | 1.370682787  | 2.04E-07 |
| <i>Chac1</i>      | ENSMUSG00000027313 | 1.818388023  | 2.08E-07 |
| <i>Aldh1a2</i>    | ENSMUSG00000013584 | 1.408554456  | 2.11E-07 |
| <i>Ank2</i>       | ENSMUSG00000032826 | -1.164278048 | 2.24E-07 |
| <i>Wnk2</i>       | ENSMUSG00000037989 | -1.662404213 | 2.27E-07 |
| <i>Acss1</i>      | ENSMUSG00000027452 | -0.94780131  | 2.32E-07 |
| <i>Maob</i>       | ENSMUSG00000040147 | -1.494524853 | 2.40E-07 |
| <i>Myc</i>        | ENSMUSG00000022346 | 1.655143888  | 2.42E-07 |
| <i>Tpd52l1</i>    | ENSMUSG00000000296 | -1.682348722 | 2.42E-07 |
| <i>Fbln2</i>      | ENSMUSG00000064080 | 1.255221016  | 2.42E-07 |
| <i>Otulin</i>     | ENSMUSG00000046034 | 1.076945673  | 2.50E-07 |
| <i>P2ry10</i>     | ENSMUSG00000050921 | 4.732145436  | 2.52E-07 |
| <i>Uros</i>       | ENSMUSG00000030979 | -1.177252667 | 2.78E-07 |
| <i>Rpl10a-ps1</i> | ENSMUSG00000084416 | 1.191344246  | 2.79E-07 |
| <i>Adcy6</i>      | ENSMUSG00000022994 | -0.986761727 | 2.99E-07 |
| <i>Slc9a2</i>     | ENSMUSG00000026062 | -2.014313559 | 3.02E-07 |
| <i>Kyat3</i>      | ENSMUSG00000040213 | -1.461158055 | 3.04E-07 |
| <i>Prrc2b</i>     | ENSMUSG00000039262 | -1.146163653 | 3.08E-07 |
| <i>Tmem35a</i>    | ENSMUSG00000033578 | -2.08833436  | 3.14E-07 |
| <i>Agtr1a</i>     | ENSMUSG00000049115 | -1.699078418 | 3.22E-07 |

|                      |                    |              |          |
|----------------------|--------------------|--------------|----------|
| <i>Cenpm</i>         | ENSMUSG00000068101 | 2.719405376  | 3.24E-07 |
| <i>Arcp5</i>         | ENSMUSG00000008475 | 0.943985405  | 3.25E-07 |
| <i>Tubb3</i>         | ENSMUSG00000062380 | 2.0086526    | 3.33E-07 |
| <i>Krt222</i>        | ENSMUSG00000035849 | -1.371035574 | 3.33E-07 |
| <i>Birc5</i>         | ENSMUSG00000017716 | 2.698983358  | 3.33E-07 |
| <i>Plin3</i>         | ENSMUSG00000024197 | -0.976503999 | 3.41E-07 |
| <i>Tcea3</i>         | ENSMUSG00000001604 | -1.067527318 | 3.45E-07 |
| <i>Rps12-ps3</i>     | ENSMUSG00000067038 | 0.918026342  | 3.53E-07 |
| <i>Clec4d</i>        | ENSMUSG00000030144 | 2.362230626  | 3.57E-07 |
| <i>Klrd1</i>         | ENSMUSG00000030165 | 4.637941588  | 3.58E-07 |
| <i>D3Ertd751e</i>    | ENSMUSG00000025766 | -1.389297011 | 3.62E-07 |
| <i>Pkhd11l</i>       | ENSMUSG00000038725 | -1.836616059 | 3.65E-07 |
| <i>Nfkbia</i>        | ENSMUSG00000021025 | 0.933653559  | 3.67E-07 |
| <i>Cd52</i>          | ENSMUSG00000000682 | 1.63222227   | 3.72E-07 |
| <i>B230369F24Rik</i> | ENSMUSG00000086350 | -1.803618893 | 3.77E-07 |
| <i>Gm28661</i>       | ENSMUSG00000102070 | -1.444872074 | 3.81E-07 |
| <i>Bcat1</i>         | ENSMUSG00000030268 | 1.96361542   | 3.81E-07 |
| <i>Tgfb3</i>         | ENSMUSG00000021253 | 1.201545313  | 3.81E-07 |
| <i>Mut</i>           | ENSMUSG00000023921 | -1.232699487 | 3.81E-07 |
| <i>Nqo2</i>          | ENSMUSG00000046949 | -1.111149875 | 3.89E-07 |
| <i>Pfkl</i>          | ENSMUSG00000020277 | 0.853857919  | 3.89E-07 |
| <i>Slpr1</i>         | ENSMUSG00000045092 | 1.155256917  | 3.92E-07 |
| <i>Loxl3</i>         | ENSMUSG00000000693 | 1.782966926  | 3.92E-07 |
| <i>Heatr5b</i>       | ENSMUSG00000039414 | -1.326305651 | 4.05E-07 |
| <i>Dbf4</i>          | ENSMUSG00000002297 | 2.245377208  | 4.07E-07 |
| <i>mt-Nd4</i>        | ENSMUSG00000064363 | -1.31561741  | 4.20E-07 |
| <i>Gm19410</i>       | ENSMUSG00000109372 | 2.353395442  | 4.22E-07 |
| <i>H2afz</i>         | ENSMUSG00000037894 | 1.05836761   | 4.27E-07 |
| <i>Nrip3</i>         | ENSMUSG00000034825 | 7.353270702  | 4.34E-07 |
| <i>Ackr4</i>         | ENSMUSG00000079355 | 1.336284833  | 4.40E-07 |
| <i>Depdc1a</i>       | ENSMUSG00000028175 | 3.621837645  | 4.40E-07 |
| <i>Ryr2</i>          | ENSMUSG00000021313 | -1.216800211 | 4.46E-07 |
| <i>Gins2</i>         | ENSMUSG00000031821 | 1.939140236  | 4.57E-07 |
| <i>Pfkfb1</i>        | ENSMUSG00000025271 | -2.33875793  | 4.68E-07 |
| <i>Hprt</i>          | ENSMUSG00000025630 | 0.853570528  | 4.73E-07 |
| <i>Irs2</i>          | ENSMUSG00000038894 | 1.641698169  | 4.76E-07 |
| <i>Gm13340</i>       | ENSMUSG00000083563 | -1.662793366 | 4.76E-07 |
| <i>Eno1b</i>         | ENSMUSG00000059040 | 2.069814265  | 4.76E-07 |
| <i>Ccr2</i>          | ENSMUSG00000049103 | 1.594619683  | 4.76E-07 |
| <i>Sla</i>           | ENSMUSG00000022372 | 1.582972085  | 4.80E-07 |

|                      |                    |              |          |
|----------------------|--------------------|--------------|----------|
| <i>Calcoco1</i>      | ENSMUSG00000023055 | -1.020374293 | 4.84E-07 |
| <i>Ric8b</i>         | ENSMUSG00000035620 | -1.267871909 | 4.86E-07 |
| <i>Sfrp2</i>         | ENSMUSG00000027996 | 1.629466118  | 4.92E-07 |
| <i>Fmo5</i>          | ENSMUSG00000028088 | -1.249585722 | 4.92E-07 |
| <i>Nipsnap2</i>      | ENSMUSG00000029432 | -0.908409251 | 5.00E-07 |
| <i>Scml4</i>         | ENSMUSG00000044770 | 2.079966317  | 5.06E-07 |
| <i>Etfbkmt</i>       | ENSMUSG00000039958 | -1.433490273 | 5.20E-07 |
| <i>Eif1a</i>         | ENSMUSG00000057561 | 1.008395935  | 5.22E-07 |
| <i>Fam198b</i>       | ENSMUSG00000027955 | 1.004972003  | 5.24E-07 |
| <i>Hlf</i>           | ENSMUSG00000003949 | -1.467583353 | 5.36E-07 |
| <i>Cthrc1</i>        | ENSMUSG00000054196 | 4.509550324  | 5.89E-07 |
| <i>Abhd18</i>        | ENSMUSG00000037818 | -1.211143129 | 5.92E-07 |
| <i>Ttc38</i>         | ENSMUSG00000035944 | -1.39290838  | 5.92E-07 |
| <i>Stom</i>          | ENSMUSG00000026880 | -1.108731679 | 5.94E-07 |
| <i>Tango2</i>        | ENSMUSG00000013539 | -1.156761062 | 5.95E-07 |
| <i>Pdcd10</i>        | ENSMUSG00000027835 | 0.986864941  | 6.16E-07 |
| <i>Dhrs7c</i>        | ENSMUSG00000033044 | -1.397352932 | 6.22E-07 |
| <i>1600014C23Rik</i> | ENSMUSG00000094690 | 3.78417042   | 6.33E-07 |
| <i>Kcnh2</i>         | ENSMUSG00000038319 | -1.179884022 | 6.34E-07 |
| <i>Hspa1b</i>        | ENSMUSG00000090877 | 2.424431588  | 6.56E-07 |
| <i>Diaph3</i>        | ENSMUSG00000022021 | 2.688551453  | 6.65E-07 |
| <i>Fdft1</i>         | ENSMUSG00000021273 | -1.156392912 | 6.69E-07 |
| <i>Mettl7a1</i>      | ENSMUSG00000054619 | -1.141907495 | 6.72E-07 |
| <i>Rgs1</i>          | ENSMUSG00000026358 | 4.834812859  | 6.74E-07 |
| <i>Ctla2a</i>        | ENSMUSG00000044258 | 1.328038817  | 6.81E-07 |
| <i>Fhod3</i>         | ENSMUSG00000034295 | -0.952770546 | 6.81E-07 |
| <i>Gm48607</i>       | ENSMUSG00000113735 | -3.444222274 | 6.81E-07 |
| <i>Inpp5e</i>        | ENSMUSG00000026925 | -1.431555533 | 6.81E-07 |
| <i>Lyrm9</i>         | ENSMUSG00000072640 | -1.352065843 | 6.92E-07 |
| <i>Ldha-ps2</i>      | ENSMUSG00000083836 | 2.222587439  | 6.92E-07 |
| <i>Cdr2</i>          | ENSMUSG00000030878 | 1.353940296  | 7.25E-07 |
| <i>Vgll3</i>         | ENSMUSG00000091243 | 1.493175362  | 7.50E-07 |
| <i>Plekha4</i>       | ENSMUSG00000040428 | 1.58712065   | 7.51E-07 |
| <i>Ms4a4a</i>        | ENSMUSG00000101389 | 1.382556659  | 7.63E-07 |
| <i>Ppic</i>          | ENSMUSG00000024538 | 1.261349271  | 7.65E-07 |
| <i>Smim20</i>        | ENSMUSG00000061461 | -1.028939027 | 7.73E-07 |
| <i>mt-Tl2</i>        | ENSMUSG00000064366 | -3.681813462 | 7.97E-07 |
| <i>Tagln</i>         | ENSMUSG00000032085 | 3.654760516  | 7.98E-07 |
| <i>Poln</i>          | ENSMUSG00000045102 | -2.595660052 | 8.01E-07 |
| <i>Emid1</i>         | ENSMUSG00000034164 | 2.16552562   | 8.04E-07 |

|                      |                    |              |          |
|----------------------|--------------------|--------------|----------|
| <i>Gpx7</i>          | ENSMUSG00000028597 | 1.244044647  | 8.07E-07 |
| <i>Mfap2</i>         | ENSMUSG00000060572 | 1.602762683  | 8.20E-07 |
| <i>Nhp2</i>          | ENSMUSG00000001056 | 1.144406206  | 8.27E-07 |
| <i>Avil</i>          | ENSMUSG00000025432 | 3.521076359  | 8.44E-07 |
| <i>Ttll1</i>         | ENSMUSG00000022442 | -1.653123847 | 8.65E-07 |
| <i>Klhl30</i>        | ENSMUSG00000026308 | -1.2986904   | 8.77E-07 |
| <i>Lhfp</i>          | ENSMUSG00000048332 | 1.084873348  | 8.85E-07 |
| <i>Mt2</i>           | ENSMUSG00000031762 | 2.34454108   | 8.86E-07 |
| <i>Adamts2</i>       | ENSMUSG00000036545 | 1.241192914  | 8.93E-07 |
| <i>Tmem119</i>       | ENSMUSG00000054675 | 1.133402979  | 9.09E-07 |
| <i>Abcb8</i>         | ENSMUSG00000028973 | -0.973710635 | 9.09E-07 |
| <i>Adcy5</i>         | ENSMUSG00000022840 | -1.232697742 | 9.09E-07 |
| <i>Cacna1c</i>       | ENSMUSG00000051331 | -1.117413652 | 9.13E-07 |
| <i>Irx1</i>          | ENSMUSG00000060969 | -1.846254366 | 9.14E-07 |
| <i>Rps27a</i>        | ENSMUSG00000020460 | 1.289587733  | 9.34E-07 |
| <i>Armh3</i>         | ENSMUSG00000039901 | -1.26768931  | 9.55E-07 |
| <i>2310040G24Rik</i> | ENSMUSG00000101655 | -1.526497941 | 9.65E-07 |
| <i>Kcnn2</i>         | ENSMUSG00000054477 | -1.880933328 | 1.01E-06 |
| <i>Gchfr</i>         | ENSMUSG00000046814 | -1.765790796 | 1.04E-06 |
| <i>Thyl</i>          | ENSMUSG00000032011 | 1.173011758  | 1.06E-06 |
| <i>Cenpk</i>         | ENSMUSG00000021714 | 3.589882965  | 1.07E-06 |
| <i>Rpsa</i>          | ENSMUSG00000032518 | 0.849168127  | 1.08E-06 |
| <i>Ckap2l</i>        | ENSMUSG00000048327 | 2.540091029  | 1.09E-06 |
| <i>Sall1</i>         | ENSMUSG00000031665 | -2.215722309 | 1.11E-06 |
| <i>Gm28979</i>       | ENSMUSG00000101941 | -2.812744898 | 1.11E-06 |
| <i>Mest</i>          | ENSMUSG00000051855 | 1.846238019  | 1.11E-06 |
| <i>Rpl19-ps11</i>    | ENSMUSG00000081094 | 1.266684863  | 1.11E-06 |
| <i>Slc41a1</i>       | ENSMUSG00000013275 | -1.111438093 | 1.12E-06 |
| <i>Cavin3</i>        | ENSMUSG00000037060 | 1.163648813  | 1.12E-06 |
| <i>Aldh2</i>         | ENSMUSG00000029455 | -0.903893704 | 1.14E-06 |
| <i>Tspan6</i>        | ENSMUSG00000067377 | 1.250966435  | 1.15E-06 |
| <i>Gypc</i>          | ENSMUSG00000090523 | -1.074601061 | 1.17E-06 |
| <i>Gcdh</i>          | ENSMUSG00000003809 | -1.18181064  | 1.18E-06 |
| <i>Pdlim2</i>        | ENSMUSG00000022090 | 1.351899297  | 1.20E-06 |
| <i>Isoc2a</i>        | ENSMUSG00000086784 | -1.288442646 | 1.23E-06 |
| <i>Acadm</i>         | ENSMUSG00000062908 | -1.071899692 | 1.24E-06 |
| <i>Etfdh</i>         | ENSMUSG00000027809 | -0.959155245 | 1.25E-06 |
| <i>Mmp12</i>         | ENSMUSG00000049723 | 2.816258461  | 1.26E-06 |
| <i>Ran</i>           | ENSMUSG00000029430 | 0.807309196  | 1.26E-06 |
| <i>Pimreg</i>        | ENSMUSG00000020808 | 2.817618727  | 1.26E-06 |



|                      |                    |              |          |
|----------------------|--------------------|--------------|----------|
| <i>Nppb</i>          | ENSMUSG00000029019 | 3.396223974  | 1.29E-06 |
| <i>Vwf</i>           | ENSMUSG00000001930 | -1.03329801  | 1.29E-06 |
| <i>Ehhadh</i>        | ENSMUSG00000022853 | -1.655172524 | 1.29E-06 |
| <i>Mpeg1</i>         | ENSMUSG00000046805 | 1.607237249  | 1.31E-06 |
| <i>Eef1a1</i>        | ENSMUSG00000037742 | 1.076272601  | 1.35E-06 |
| <i>Kbtbd3</i>        | ENSMUSG00000025893 | -1.578508105 | 1.36E-06 |
| <i>BB218582</i>      | ENSMUSG00000085218 | -2.128366264 | 1.39E-06 |
| <i>Gpr153</i>        | ENSMUSG00000042804 | 1.353800671  | 1.39E-06 |
| <i>Prrx2</i>         | ENSMUSG00000039476 | 2.916719161  | 1.41E-06 |
| <i>Angptl4</i>       | ENSMUSG00000002289 | 1.669918231  | 1.41E-06 |
| <i>Col5a1</i>        | ENSMUSG00000026837 | 1.049856466  | 1.45E-06 |
| <i>Endod1</i>        | ENSMUSG00000037419 | 1.159387638  | 1.45E-06 |
| <i>Arid5a</i>        | ENSMUSG00000037447 | 1.468441446  | 1.47E-06 |
| <i>Ostc</i>          | ENSMUSG00000041084 | 0.873435461  | 1.48E-06 |
| <i>Golt1b</i>        | ENSMUSG00000030245 | 1.102086299  | 1.49E-06 |
| <i>Tmem108</i>       | ENSMUSG00000042757 | -1.435328394 | 1.51E-06 |
| <i>Cacnb1</i>        | ENSMUSG00000020882 | 1.908865821  | 1.57E-06 |
| <i>Col6a2</i>        | ENSMUSG00000020241 | 0.905451999  | 1.59E-06 |
| <i>Vit</i>           | ENSMUSG00000024076 | -1.494954843 | 1.63E-06 |
| <i>1700017B05Rik</i> | ENSMUSG00000032300 | 1.358026403  | 1.64E-06 |
| <i>6030408B16Rik</i> | ENSMUSG00000075408 | 1.56702257   | 1.66E-06 |
| <i>Capza1</i>        | ENSMUSG00000070372 | 0.973969225  | 1.67E-06 |
| <i>Tmtc1</i>         | ENSMUSG00000030306 | -0.907236757 | 1.67E-06 |
| <i>Slc16a3</i>       | ENSMUSG00000025161 | 1.563490171  | 1.72E-06 |
| <i>Tcaim</i>         | ENSMUSG00000046603 | -1.396982059 | 1.72E-06 |
| <i>Lsp1</i>          | ENSMUSG00000018819 | 1.125766833  | 1.72E-06 |
| <i>Rpl13a</i>        | ENSMUSG00000074129 | 1.040763054  | 1.82E-06 |
| <i>Fxyd5</i>         | ENSMUSG00000009687 | 1.280068442  | 1.91E-06 |
| <i>Rps14</i>         | ENSMUSG00000024608 | 1.018122514  | 1.94E-06 |
| <i>Eif2s2</i>        | ENSMUSG00000074656 | 0.934743123  | 1.96E-06 |
| <i>Higd1b</i>        | ENSMUSG00000020928 | 1.314240108  | 1.99E-06 |
| <i>Nav2</i>          | ENSMUSG00000052512 | -1.618533414 | 2.06E-06 |
| <i>Mturn</i>         | ENSMUSG00000038065 | -1.059528786 | 2.13E-06 |
| <i>Msrb2</i>         | ENSMUSG00000023094 | -1.283088691 | 2.14E-06 |
| <i>Fibin</i>         | ENSMUSG00000074971 | 1.444836961  | 2.15E-06 |
| <i>Kcnj5</i>         | ENSMUSG00000032034 | -1.473086748 | 2.16E-06 |
| <i>Cnn3</i>          | ENSMUSG00000053931 | 0.953213013  | 2.16E-06 |
| <i>Acacb</i>         | ENSMUSG00000042010 | -1.146300725 | 2.16E-06 |
| <i>Gramd1b</i>       | ENSMUSG00000040111 | -1.261007214 | 2.16E-06 |
| <i>Efh2</i>          | ENSMUSG00000040659 | 1.288512251  | 2.16E-06 |

|                 |                    |              |          |
|-----------------|--------------------|--------------|----------|
| <i>Myl6</i>     | ENSMUSG00000090841 | 1.234969997  | 2.18E-06 |
| <i>Arrdc4</i>   | ENSMUSG00000042659 | 1.446775884  | 2.21E-06 |
| <i>Ppp4c</i>    | ENSMUSG00000030697 | 0.88336881   | 2.27E-06 |
| <i>Pcca</i>     | ENSMUSG00000041650 | -1.005099429 | 2.29E-06 |
| <i>Gm7901</i>   | ENSMUSG00000101431 | 2.991966058  | 2.31E-06 |
| <i>Tmem158</i>  | ENSMUSG00000054871 | 1.461832649  | 2.32E-06 |
| <i>Ncf1</i>     | ENSMUSG00000015950 | 1.108205441  | 2.33E-06 |
| <i>Gm6793</i>   | ENSMUSG00000092086 | 1.105569248  | 2.34E-06 |
| <i>Ms4a6c</i>   | ENSMUSG00000079419 | 1.348001262  | 2.35E-06 |
| <i>Hsbp1l1</i>  | ENSMUSG00000078963 | -2.351168081 | 2.37E-06 |
| <i>Slc1a3</i>   | ENSMUSG00000005360 | 1.709358949  | 2.47E-06 |
| <i>Gm43050</i>  | ENSMUSG00000106795 | -2.176600341 | 2.50E-06 |
| <i>Ccdc69</i>   | ENSMUSG00000049588 | -1.710677001 | 2.53E-06 |
| <i>Plac8</i>    | ENSMUSG00000029322 | 1.664372936  | 2.53E-06 |
| <i>Serpinh1</i> | ENSMUSG00000070436 | 0.91056999   | 2.53E-06 |
| <i>Ipo13</i>    | ENSMUSG00000033365 | -1.066094799 | 2.54E-06 |
| <i>Ms4a4c</i>   | ENSMUSG00000024675 | 2.254168523  | 2.56E-06 |
| <i>S100a11</i>  | ENSMUSG00000027907 | 1.195277531  | 2.58E-06 |
| <i>Angptl6</i>  | ENSMUSG00000038742 | 1.435140913  | 2.61E-06 |
| <i>Gpd1</i>     | ENSMUSG00000023019 | -0.974235267 | 2.68E-06 |
| <i>Prdx4</i>    | ENSMUSG00000025289 | 0.92243383   | 2.69E-06 |
| <i>Rps6ka2</i>  | ENSMUSG00000023809 | -1.31394641  | 2.73E-06 |
| <i>Praf2</i>    | ENSMUSG00000031149 | 1.440734502  | 2.73E-06 |
| <i>Iigp1</i>    | ENSMUSG00000054072 | -1.072981009 | 2.75E-06 |
| <i>Ltbp2</i>    | ENSMUSG00000002020 | 4.140731884  | 2.79E-06 |
| <i>Lhfp12</i>   | ENSMUSG00000045312 | 1.560997217  | 2.83E-06 |
| <i>Cnksr1</i>   | ENSMUSG00000028841 | 1.499789335  | 2.83E-06 |
| <i>Gtf2i</i>    | ENSMUSG00000060261 | -0.851680444 | 2.87E-06 |
| <i>Nebl</i>     | ENSMUSG00000053702 | -1.115171316 | 2.93E-06 |
| <i>Cenpi</i>    | ENSMUSG00000031262 | 3.219661164  | 2.94E-06 |
| <i>Gpx8</i>     | ENSMUSG00000021760 | 0.947470771  | 3.00E-06 |
| <i>Hdac11</i>   | ENSMUSG00000034245 | -1.33163119  | 3.00E-06 |
| <i>Pkia</i>     | ENSMUSG00000027499 | -1.080577589 | 3.07E-06 |
| <i>Prpf38a</i>  | ENSMUSG00000063800 | 0.948649548  | 3.11E-06 |
| <i>Pik3ip1</i>  | ENSMUSG00000034614 | -1.087365344 | 3.13E-06 |
| <i>Gstm2</i>    | ENSMUSG00000040562 | -0.964434295 | 3.13E-06 |
| <i>Efemp2</i>   | ENSMUSG00000024909 | 0.95613906   | 3.22E-06 |
| <i>Jdp2</i>     | ENSMUSG00000034271 | 1.197341858  | 3.30E-06 |
| <i>Klhl24</i>   | ENSMUSG00000062901 | -0.889560375 | 3.31E-06 |
| <i>Mitf</i>     | ENSMUSG00000035158 | -1.176928287 | 3.40E-06 |

|                  |                    |              |          |
|------------------|--------------------|--------------|----------|
| <i>Utp18</i>     | ENSMUSG00000054079 | 1.128382917  | 3.41E-06 |
| <i>Mad21l</i>    | ENSMUSG00000029910 | 1.428997331  | 3.43E-06 |
| <i>Sap30</i>     | ENSMUSG00000031609 | 1.012894019  | 3.44E-06 |
| <i>Ehbp1</i>     | ENSMUSG00000042302 | -0.942440301 | 3.62E-06 |
| <i>Skil</i>      | ENSMUSG00000027660 | 1.238072039  | 3.69E-06 |
| <i>Btg2</i>      | ENSMUSG00000020423 | 1.387814323  | 3.69E-06 |
| <i>Kank1</i>     | ENSMUSG00000032702 | -0.922280913 | 3.69E-06 |
| <i>Eepd1</i>     | ENSMUSG00000036611 | -1.2730314   | 3.69E-06 |
| <i>Lbh</i>       | ENSMUSG00000024063 | -0.837310225 | 3.69E-06 |
| <i>Lsmem2</i>    | ENSMUSG00000103409 | -1.518770328 | 3.71E-06 |
| <i>Il4ra</i>     | ENSMUSG00000030748 | 1.416697166  | 3.73E-06 |
| <i>Gtpbp4</i>    | ENSMUSG00000021149 | 0.97101698   | 3.77E-06 |
| <i>Tmem94</i>    | ENSMUSG00000020747 | -1.209690789 | 3.80E-06 |
| <i>Nr3c2</i>     | ENSMUSG00000031618 | -1.549845332 | 3.88E-06 |
| <i>Sfrp1</i>     | ENSMUSG00000031548 | 1.420525603  | 3.89E-06 |
| <i>Etfa</i>      | ENSMUSG00000032314 | -0.87917802  | 3.95E-06 |
| <i>Tmsb4x</i>    | ENSMUSG00000049775 | 1.139017809  | 3.95E-06 |
| <i>Smim5</i>     | ENSMUSG00000048442 | -1.396573182 | 3.98E-06 |
| <i>Csfl</i>      | ENSMUSG00000014599 | -1.049583458 | 3.98E-06 |
| <i>Gm30873</i>   | ENSMUSG00000109341 | 2.83354443   | 4.00E-06 |
| <i>Bub1</i>      | ENSMUSG00000027379 | 2.956984581  | 4.01E-06 |
| <i>Pak6</i>      | ENSMUSG00000074923 | -1.527606847 | 4.07E-06 |
| <i>Cep112</i>    | ENSMUSG00000020728 | -1.462015874 | 4.08E-06 |
| <i>Ppp1r15a</i>  | ENSMUSG00000040435 | 1.179358054  | 4.13E-06 |
| <i>Unc5b</i>     | ENSMUSG00000020099 | 1.332599365  | 4.18E-06 |
| <i>Xpnpep2</i>   | ENSMUSG00000037005 | -2.634116217 | 4.20E-06 |
| <i>Lrrn4</i>     | ENSMUSG00000043110 | -1.749282966 | 4.23E-06 |
| <i>Rps13-ps2</i> | ENSMUSG00000069972 | 1.150089587  | 4.38E-06 |
| <i>Gpm6b</i>     | ENSMUSG00000031342 | 0.899424449  | 4.43E-06 |
| <i>Gm48583</i>   | ENSMUSG00000114277 | 1.610156518  | 4.43E-06 |
| <i>Angpt1</i>    | ENSMUSG00000022309 | -1.21211191  | 4.45E-06 |
| <i>Eva1b</i>     | ENSMUSG00000050212 | 1.177838775  | 4.46E-06 |
| <i>Pcsk6</i>     | ENSMUSG00000030513 | -0.989261561 | 4.52E-06 |
| <i>Cs</i>        | ENSMUSG00000005683 | -0.901349725 | 4.57E-06 |
| <i>Pitpnc1</i>   | ENSMUSG00000040430 | -1.076536474 | 4.71E-06 |
| <i>Sox7</i>      | ENSMUSG00000063060 | -1.440691502 | 4.80E-06 |
| <i>Pck2</i>      | ENSMUSG00000040618 | 1.020324049  | 4.83E-06 |
| <i>Rps18</i>     | ENSMUSG00000008668 | 0.956038813  | 4.85E-06 |
| <i>Scn4a</i>     | ENSMUSG00000001027 | -2.579729725 | 4.87E-06 |
| <i>Tpi1</i>      | ENSMUSG00000023456 | 0.764152283  | 4.89E-06 |

|                      |                    |              |          |
|----------------------|--------------------|--------------|----------|
| <i>Esd</i>           | ENSMUSG00000021996 | 0.950015559  | 4.91E-06 |
| <i>Cep128</i>        | ENSMUSG00000061533 | -1.467425753 | 4.93E-06 |
| <i>Trem2</i>         | ENSMUSG00000023992 | 1.59614106   | 4.97E-06 |
| <i>Svil</i>          | ENSMUSG00000024236 | -0.980200696 | 4.97E-06 |
| <i>D830032E09Rik</i> | ENSMUSG00000100457 | -1.73556853  | 4.97E-06 |
| <i>Gm37829</i>       | ENSMUSG00000104453 | -1.332341099 | 5.07E-06 |
| <i>Gfra1</i>         | ENSMUSG00000025089 | -1.632863435 | 5.19E-06 |
| <i>Tspan9</i>        | ENSMUSG00000030352 | 0.90529151   | 5.23E-06 |
| <i>Mrpl42</i>        | ENSMUSG00000062981 | -0.803593259 | 5.23E-06 |
| <i>Amy1</i>          | ENSMUSG00000074264 | -2.139902006 | 5.33E-06 |
| <i>Mettl1</i>        | ENSMUSG00000006732 | 1.214694556  | 5.63E-06 |
| <i>Tmod3</i>         | ENSMUSG00000058587 | 0.876173709  | 5.64E-06 |
| <i>4930481A15Rik</i> | ENSMUSG00000086938 | -1.610341823 | 5.69E-06 |
| <i>Wfikkn2</i>       | ENSMUSG00000044177 | -1.918438656 | 5.75E-06 |
| <i>Prepl</i>         | ENSMUSG00000024127 | -1.098835129 | 5.77E-06 |
| <i>Ralgapa2</i>      | ENSMUSG00000037110 | -1.101631436 | 6.04E-06 |
| <i>Pxmp2</i>         | ENSMUSG00000029499 | -1.062813203 | 6.04E-06 |
| <i>Rab31</i>         | ENSMUSG00000056515 | 1.332180692  | 6.07E-06 |
| <i>Sdf2l1</i>        | ENSMUSG00000022769 | 1.212363324  | 6.08E-06 |
| <i>Kif11</i>         | ENSMUSG00000012443 | 2.065763225  | 6.09E-06 |
| <i>Cdca3</i>         | ENSMUSG00000023505 | 2.379480007  | 6.11E-06 |
| <i>Gnl3</i>          | ENSMUSG00000042354 | 0.926123797  | 6.18E-06 |
| <i>Pbp2</i>          | ENSMUSG00000047104 | 7.072008991  | 6.18E-06 |
| <i>Stc1</i>          | ENSMUSG00000014813 | 1.73235579   | 6.19E-06 |
| <i>Sbk2</i>          | ENSMUSG00000030433 | -2.150162998 | 6.27E-06 |
| <i>Qsox1</i>         | ENSMUSG00000033684 | 0.940451241  | 6.77E-06 |
| <i>Tnfsf18</i>       | ENSMUSG00000066755 | 3.989097012  | 6.81E-06 |
| <i>Psmc8</i>         | ENSMUSG00000030591 | 0.892404988  | 6.96E-06 |
| <i>Snx10</i>         | ENSMUSG00000038301 | 0.939024748  | 6.96E-06 |
| <i>Shcbp1</i>        | ENSMUSG00000022322 | 2.343715821  | 7.01E-06 |
| <i>Alox5</i>         | ENSMUSG00000025701 | -1.106249609 | 7.01E-06 |
| <i>Vwa8</i>          | ENSMUSG00000058997 | -0.973577962 | 7.01E-06 |
| <i>Ncapg2</i>        | ENSMUSG00000042029 | 1.836343999  | 7.06E-06 |
| <i>Slc25a29</i>      | ENSMUSG00000021265 | -1.519509038 | 7.16E-06 |
| <i>Pla2g5</i>        | ENSMUSG00000041193 | -1.26396327  | 7.16E-06 |
| <i>Fcgr4</i>         | ENSMUSG00000059089 | 1.989173394  | 7.17E-06 |
| <i>Aldh5a1</i>       | ENSMUSG00000035936 | -1.298072821 | 7.17E-06 |
| <i>Srxn1</i>         | ENSMUSG00000032802 | 1.042810432  | 7.40E-06 |
| <i>Serpinfl</i>      | ENSMUSG00000000753 | 1.124034813  | 7.45E-06 |
| <i>Enah</i>          | ENSMUSG00000022995 | 0.847724523  | 7.51E-06 |

|                   |                    |              |          |
|-------------------|--------------------|--------------|----------|
| <i>Urah</i>       | ENSMUSG00000025481 | -4.732165114 | 7.74E-06 |
| <i>Spc25</i>      | ENSMUSG00000005233 | 2.264282555  | 7.80E-06 |
| <i>Arhgef40</i>   | ENSMUSG00000004562 | 0.930068744  | 7.89E-06 |
| <i>Fbxo32</i>     | ENSMUSG00000022358 | -0.892567695 | 7.93E-06 |
| <i>Rpl17-ps5</i>  | ENSMUSG00000081855 | 1.145788966  | 7.98E-06 |
| <i>A2m</i>        | ENSMUSG00000030111 | -2.360770548 | 8.08E-06 |
| <i>Polq</i>       | ENSMUSG00000034206 | -2.067809166 | 8.08E-06 |
| <i>Prox1</i>      | ENSMUSG00000010175 | -1.182078873 | 8.13E-06 |
| <i>Ttc9</i>       | ENSMUSG00000042734 | 1.56423955   | 8.30E-06 |
| <i>Ankrd45</i>    | ENSMUSG00000044835 | -2.741415049 | 8.57E-06 |
| <i>Serpinb6a</i>  | ENSMUSG00000060147 | 0.816423095  | 8.82E-06 |
| <i>Muc16</i>      | ENSMUSG00000109564 | -2.173683184 | 8.89E-06 |
| <i>Prr7</i>       | ENSMUSG00000034686 | 2.052441457  | 8.89E-06 |
| <i>Antxr2</i>     | ENSMUSG00000029338 | -1.028056568 | 8.99E-06 |
| <i>AC161607.1</i> | ENSMUSG00000116903 | -2.054671129 | 8.99E-06 |
| <i>Tmem141</i>    | ENSMUSG00000026939 | -1.091650086 | 8.99E-06 |
| <i>Tbcd4</i>      | ENSMUSG00000033083 | -1.117287141 | 9.00E-06 |
| <i>Acadsb</i>     | ENSMUSG00000030861 | -0.880877917 | 9.24E-06 |
| <i>Mmab</i>       | ENSMUSG00000029575 | -1.196723219 | 9.38E-06 |
| <i>Cdkn3</i>      | ENSMUSG00000037628 | 2.379199984  | 9.48E-06 |
| <i>Arf2</i>       | ENSMUSG00000062421 | 0.883892745  | 9.52E-06 |
| <i>Mmp23</i>      | ENSMUSG00000029061 | 1.076199741  | 9.60E-06 |
| <i>Art1</i>       | ENSMUSG00000030996 | -1.02657637  | 9.61E-06 |
| <i>Arf4</i>       | ENSMUSG00000021877 | 0.787282653  | 9.66E-06 |
| <i>Ugp2</i>       | ENSMUSG00000001891 | 1.024933624  | 9.69E-06 |
| <i>Atf7ip</i>     | ENSMUSG00000030213 | -0.99017615  | 9.77E-06 |
| <i>Cdc20</i>      | ENSMUSG00000006398 | 2.016573601  | 1.00E-05 |
| <i>Ctsz</i>       | ENSMUSG00000016256 | 0.980331627  | 1.01E-05 |
| <i>Dusp2</i>      | ENSMUSG00000027368 | 2.66872359   | 1.02E-05 |
| <i>Ncf2</i>       | ENSMUSG00000026480 | 1.151888836  | 1.03E-05 |
| <i>Ociad2</i>     | ENSMUSG00000029153 | -1.547386029 | 1.03E-05 |
| <i>Art5</i>       | ENSMUSG00000070424 | -1.581138935 | 1.03E-05 |
| <i>Upf3a</i>      | ENSMUSG00000038398 | 0.96758053   | 1.03E-05 |
| <i>Arpc4</i>      | ENSMUSG00000079426 | 0.805036541  | 1.04E-05 |
| <i>Mccc2</i>      | ENSMUSG00000021646 | -1.028401939 | 1.06E-05 |
| <i>Map6</i>       | ENSMUSG00000055407 | 1.51042179   | 1.08E-05 |
| <i>Dbnl</i>       | ENSMUSG00000020476 | 0.849506324  | 1.11E-05 |
| <i>Kbtbd13</i>    | ENSMUSG00000054978 | -3.558188052 | 1.11E-05 |
| <i>Srm</i>        | ENSMUSG00000006442 | 0.905583732  | 1.11E-05 |
| <i>Figf</i>       | ENSMUSG00000075324 | -2.31549876  | 1.13E-05 |

|                      |                    |              |          |
|----------------------|--------------------|--------------|----------|
| <i>Rack1</i>         | ENSMUSG00000020372 | 0.767815291  | 1.14E-05 |
| <i>Smco1</i>         | ENSMUSG00000046345 | -1.587713255 | 1.15E-05 |
| <i>Rcn3</i>          | ENSMUSG00000019539 | 1.041754327  | 1.17E-05 |
| <i>Chrna2</i>        | ENSMUSG00000022041 | -2.584022339 | 1.19E-05 |
| <i>Pkd2l2</i>        | ENSMUSG00000014503 | -1.75548522  | 1.20E-05 |
| <i>Slamf9</i>        | ENSMUSG00000026548 | 1.113646205  | 1.20E-05 |
| <i>Zdhhc2</i>        | ENSMUSG00000039470 | 1.372048554  | 1.21E-05 |
| <i>Ccdc34</i>        | ENSMUSG00000027160 | 1.234342357  | 1.23E-05 |
| <i>4930453N24Rik</i> | ENSMUSG00000059920 | 0.84525965   | 1.24E-05 |
| <i>Ddx50</i>         | ENSMUSG00000020076 | 0.862454248  | 1.27E-05 |
| <i>Tmbim1</i>        | ENSMUSG00000006301 | 1.19741516   | 1.28E-05 |
| <i>Tars</i>          | ENSMUSG00000022241 | 0.860727785  | 1.28E-05 |
| <i>Psmc13</i>        | ENSMUSG00000025487 | 0.786994828  | 1.30E-05 |
| <i>Gnb3</i>          | ENSMUSG00000023439 | -1.818104318 | 1.30E-05 |
| <i>Gm17501</i>       | ENSMUSG00000097183 | 2.09063089   | 1.30E-05 |
| <i>Pdk4</i>          | ENSMUSG00000019577 | 0.925992244  | 1.30E-05 |
| <i>Tent5a</i>        | ENSMUSG00000032265 | 1.014447898  | 1.31E-05 |
| <i>Rgs4</i>          | ENSMUSG00000038530 | 1.150388605  | 1.32E-05 |
| <i>Hadhb</i>         | ENSMUSG00000059447 | -0.863533791 | 1.33E-05 |
| <i>Gbel</i>          | ENSMUSG00000022707 | 0.88892169   | 1.33E-05 |
| <i>Psmc4</i>         | ENSMUSG00000040850 | -0.881287277 | 1.36E-05 |
| <i>Fgf1</i>          | ENSMUSG00000036585 | -0.84547093  | 1.36E-05 |
| <i>Ccl5</i>          | ENSMUSG00000035042 | 2.998315146  | 1.39E-05 |
| <i>Ccdc136</i>       | ENSMUSG00000029769 | 2.02915275   | 1.40E-05 |
| <i>Sugt1</i>         | ENSMUSG00000022024 | 0.792604883  | 1.41E-05 |
| <i>Rbm3-ps</i>       | ENSMUSG00000099875 | 2.00498998   | 1.41E-05 |
| <i>Arhgdib</i>       | ENSMUSG00000030220 | 0.866222892  | 1.41E-05 |
| <i>Eif4a-ps4</i>     | ENSMUSG00000101188 | 0.948410705  | 1.42E-05 |
| <i>Akap1</i>         | ENSMUSG00000018428 | -1.011910312 | 1.43E-05 |
| <i>Mgst1</i>         | ENSMUSG00000008540 | -0.823950954 | 1.46E-05 |
| <i>mt-Atp8</i>       | ENSMUSG00000064356 | -2.49934843  | 1.48E-05 |
| <i>Chrm2</i>         | ENSMUSG00000045613 | -1.228110233 | 1.49E-05 |
| <i>Mccc1</i>         | ENSMUSG00000027709 | -1.094579455 | 1.51E-05 |
| <i>Kcnk2</i>         | ENSMUSG00000037624 | 1.354823517  | 1.52E-05 |
| <i>Det1</i>          | ENSMUSG00000030610 | -1.080541949 | 1.53E-05 |
| <i>Wisp1</i>         | ENSMUSG00000005124 | 2.643785372  | 1.53E-05 |
| <i>Nsmf</i>          | ENSMUSG00000006476 | 1.145595604  | 1.55E-05 |
| <i>Angptl7</i>       | ENSMUSG00000028989 | 1.654402865  | 1.55E-05 |
| <i>Prkab1</i>        | ENSMUSG00000029513 | -0.996691199 | 1.56E-05 |
| <i>Coll6a1</i>       | ENSMUSG00000040690 | 1.310880065  | 1.59E-05 |

|                |                    |              |          |
|----------------|--------------------|--------------|----------|
| <i>Cotl1</i>   | ENSMUSG00000031827 | 1.141160493  | 1.60E-05 |
| <i>H3f3b</i>   | ENSMUSG00000016559 | 0.834876333  | 1.62E-05 |
| <i>Npdcc1</i>  | ENSMUSG00000015094 | 0.963705353  | 1.63E-05 |
| <i>Cidea</i>   | ENSMUSG00000024526 | 0.861174926  | 1.66E-05 |
| <i>Sobp</i>    | ENSMUSG00000038248 | -1.213106123 | 1.67E-05 |
| <i>Cacna1s</i> | ENSMUSG00000026407 | -1.885799481 | 1.67E-05 |
| <i>Myh14</i>   | ENSMUSG00000030739 | -1.097042571 | 1.71E-05 |
| <i>Lingo3</i>  | ENSMUSG00000051067 | -1.74338017  | 1.74E-05 |
| <i>Nhs1l</i>   | ENSMUSG00000039835 | -1.353955573 | 1.76E-05 |
| <i>Pcp4l1</i>  | ENSMUSG00000038370 | -1.105278807 | 1.84E-05 |
| <i>Rnf149</i>  | ENSMUSG00000048234 | 1.448107457  | 1.89E-05 |
| <i>Rab15</i>   | ENSMUSG00000021062 | 2.345807011  | 1.90E-05 |
| <i>Gm13910</i> | ENSMUSG00000063684 | -0.855304946 | 1.95E-05 |
| <i>Epha4</i>   | ENSMUSG00000026235 | -1.698949181 | 1.96E-05 |
| <i>Arhgef9</i> | ENSMUSG00000025656 | -1.143229357 | 1.99E-05 |
| <i>Snai3</i>   | ENSMUSG0000006587  | -2.037015042 | 1.99E-05 |
| <i>Gm12167</i> | ENSMUSG00000085853 | -2.544107035 | 2.01E-05 |
| <i>Pdia4</i>   | ENSMUSG00000025823 | 0.966134463  | 2.01E-05 |
| <i>Ptgis</i>   | ENSMUSG00000017969 | 0.948962716  | 2.02E-05 |
| <i>Grb14</i>   | ENSMUSG00000026888 | -1.093338547 | 2.06E-05 |
| <i>Zmym6</i>   | ENSMUSG00000042408 | -1.58836033  | 2.07E-05 |
| <i>Il6st</i>   | ENSMUSG00000021756 | -0.820999481 | 2.10E-05 |
| <i>SI00a4</i>  | ENSMUSG00000001020 | 2.28746549   | 2.11E-05 |
| <i>Map3k6</i>  | ENSMUSG00000028862 | 1.086729604  | 2.13E-05 |
| <i>Dlg2</i>    | ENSMUSG00000052572 | 1.603224869  | 2.15E-05 |
| <i>Rab12</i>   | ENSMUSG00000023460 | -0.725075259 | 2.18E-05 |
| <i>H2-Aa</i>   | ENSMUSG00000036594 | 1.045187439  | 2.18E-05 |
| <i>Camk2g</i>  | ENSMUSG00000021820 | -0.995929728 | 2.20E-05 |
| <i>Ndufb4</i>  | ENSMUSG00000022820 | -0.853806331 | 2.24E-05 |
| <i>Scx</i>     | ENSMUSG00000034161 | 1.215883451  | 2.25E-05 |
| <i>Crybb1</i>  | ENSMUSG00000029343 | -2.27069208  | 2.29E-05 |
| <i>Actn1</i>   | ENSMUSG00000015143 | 1.071917258  | 2.29E-05 |
| <i>Nol12</i>   | ENSMUSG00000033099 | 0.960808572  | 2.30E-05 |
| <i>Dmpk</i>    | ENSMUSG00000030409 | -0.863149993 | 2.31E-05 |
| <i>Ccr7</i>    | ENSMUSG00000037944 | 3.730833295  | 2.33E-05 |
| <i>Dio3</i>    | ENSMUSG00000075707 | 5.757495183  | 2.33E-05 |
| <i>Fsd2</i>    | ENSMUSG00000038663 | -0.903666039 | 2.38E-05 |
| <i>Kif22</i>   | ENSMUSG00000030677 | 2.271624287  | 2.38E-05 |
| <i>Cks2</i>    | ENSMUSG00000062248 | 2.192445687  | 2.39E-05 |
| <i>Snx7</i>    | ENSMUSG00000028007 | 0.92097076   | 2.42E-05 |

|                      |                    |              |          |
|----------------------|--------------------|--------------|----------|
| <i>Pgm1</i>          | ENSMUSG00000029171 | 1.160920678  | 2.42E-05 |
| <i>Esm1</i>          | ENSMUSG00000042379 | 3.597235783  | 2.42E-05 |
| <i>Ogdh</i>          | ENSMUSG00000020456 | -0.910128034 | 2.45E-05 |
| <i>Hs3st5</i>        | ENSMUSG00000044499 | -2.32700773  | 2.46E-05 |
| <i>Tmem100</i>       | ENSMUSG00000069763 | 1.114131856  | 2.48E-05 |
| <i>Rmnd1</i>         | ENSMUSG00000019763 | -1.394623419 | 2.49E-05 |
| <i>1500009L16Rik</i> | ENSMUSG00000087651 | 1.745244137  | 2.50E-05 |
| <i>Irx4</i>          | ENSMUSG00000021604 | -1.13760894  | 2.54E-05 |
| <i>Atp6v0a4</i>      | ENSMUSG00000038600 | 2.707446108  | 2.55E-05 |
| <i>Usp39</i>         | ENSMUSG00000056305 | 0.92823482   | 2.56E-05 |
| <i>Bub1b</i>         | ENSMUSG00000040084 | 2.049703302  | 2.61E-05 |
| <i>Actn4</i>         | ENSMUSG00000054808 | 0.856694994  | 2.62E-05 |
| <i>Esr1</i>          | ENSMUSG00000019768 | -7.269033491 | 2.73E-05 |
| <i>Paqr9</i>         | ENSMUSG00000064225 | -1.000371855 | 2.75E-05 |
| <i>Sat1</i>          | ENSMUSG00000025283 | 0.941366578  | 2.78E-05 |
| <i>Cemip</i>         | ENSMUSG00000052353 | 6.866251091  | 2.81E-05 |
| <i>Ranbp1</i>        | ENSMUSG00000005732 | 1.016139942  | 2.83E-05 |
| <i>Tnni3k</i>        | ENSMUSG00000040086 | -0.958877111 | 2.85E-05 |
| <i>Fastk</i>         | ENSMUSG00000028959 | -0.850210517 | 2.86E-05 |
| <i>Il6</i>           | ENSMUSG00000025746 | 4.531344553  | 2.95E-05 |
| <i>A530016L24Rik</i> | ENSMUSG00000043122 | -1.081498026 | 2.99E-05 |
| <i>mt-Nd2</i>        | ENSMUSG00000064345 | -1.142796124 | 2.99E-05 |
| <i>Abat</i>          | ENSMUSG00000057880 | -1.373875704 | 3.01E-05 |
| <i>Mme</i>           | ENSMUSG00000027820 | -1.5561673   | 3.01E-05 |
| <i>Htra3</i>         | ENSMUSG00000029096 | -0.746493364 | 3.03E-05 |
| <i>Arhgap20</i>      | ENSMUSG00000053199 | -1.399667673 | 3.06E-05 |
| <i>Armc2</i>         | ENSMUSG00000071324 | -1.455121631 | 3.23E-05 |
| <i>Creb3</i>         | ENSMUSG00000028466 | 0.834075539  | 3.38E-05 |
| <i>Ldhb</i>          | ENSMUSG00000030246 | -0.847516515 | 3.38E-05 |
| <i>Ap3s1</i>         | ENSMUSG00000024480 | 0.97582356   | 3.39E-05 |
| <i>Tspo</i>          | ENSMUSG00000041736 | 1.169018098  | 3.44E-05 |
| <i>Rtn2</i>          | ENSMUSG00000030401 | -1.088627295 | 3.47E-05 |
| <i>Tnfrsf10</i>      | ENSMUSG00000039304 | -1.253019177 | 3.50E-05 |
| <i>Itga5</i>         | ENSMUSG00000000555 | 0.943488062  | 3.50E-05 |
| <i>Asb2</i>          | ENSMUSG00000021200 | -0.990198446 | 3.52E-05 |
| <i>Cpt2</i>          | ENSMUSG00000028607 | -1.020655591 | 3.54E-05 |
| <i>Irx3</i>          | ENSMUSG00000031734 | -0.98892592  | 3.55E-05 |
| <i>Cct6a</i>         | ENSMUSG00000029447 | 0.728027756  | 3.59E-05 |
| <i>Cxcr6</i>         | ENSMUSG00000048521 | 2.967830317  | 3.60E-05 |
| <i>Spag5</i>         | ENSMUSG00000002055 | 3.017422173  | 3.61E-05 |



|                |                    |              |          |
|----------------|--------------------|--------------|----------|
| <i>Adralb</i>  | ENSMUSG00000050541 | -1.302048765 | 3.61E-05 |
| <i>Ctf1</i>    | ENSMUSG00000042340 | -1.7960565   | 3.63E-05 |
| <i>Mtch1</i>   | ENSMUSG00000024012 | 0.835350849  | 3.67E-05 |
| <i>Ufm1</i>    | ENSMUSG00000027746 | 0.85306856   | 3.70E-05 |
| <i>Lig1</i>    | ENSMUSG00000056394 | 1.207799015  | 3.71E-05 |
| <i>Adam11</i>  | ENSMUSG00000020926 | -1.721931217 | 3.71E-05 |
| <i>Dhrs11</i>  | ENSMUSG00000034449 | -0.819654272 | 3.75E-05 |
| <i>Set</i>     | ENSMUSG00000054766 | 0.8417092    | 3.81E-05 |
| <i>Slc20a2</i> | ENSMUSG00000037656 | -0.93306099  | 3.81E-05 |
| <i>E2f1</i>    | ENSMUSG00000027490 | 1.599715519  | 3.85E-05 |
| <i>Smarcd1</i> | ENSMUSG00000023018 | -1.057888152 | 3.87E-05 |
| <i>Rpl12</i>   | ENSMUSG00000038900 | 0.868899895  | 3.92E-05 |
| <i>Actr3b</i>  | ENSMUSG00000056367 | -1.145843887 | 4.09E-05 |
| <i>Nox4</i>    | ENSMUSG00000030562 | 1.866410387  | 4.09E-05 |
| <i>Sema3f</i>  | ENSMUSG00000034684 | 0.991296099  | 4.09E-05 |
| <i>Chic2</i>   | ENSMUSG00000029229 | 0.919562298  | 4.09E-05 |
| <i>Igfbp3</i>  | ENSMUSG00000020427 | -1.139152327 | 4.13E-05 |
| <i>Rbm20</i>   | ENSMUSG00000043639 | -1.093998606 | 4.15E-05 |
| <i>Gem</i>     | ENSMUSG00000028214 | 1.480143375  | 4.15E-05 |
| <i>Eef1e1</i>  | ENSMUSG00000001707 | 0.869597969  | 4.16E-05 |
| <i>Fech</i>    | ENSMUSG00000024588 | -0.733470059 | 4.18E-05 |
| <i>Yaeld1</i>  | ENSMUSG00000075054 | -0.926999656 | 4.23E-05 |
| <i>Gpihbp1</i> | ENSMUSG00000022579 | 0.979806221  | 4.26E-05 |
| <i>Pank1</i>   | ENSMUSG00000033610 | -1.112156216 | 4.29E-05 |
| <i>Csrnp1</i>  | ENSMUSG00000032515 | 1.143864141  | 4.30E-05 |
| <i>Matn2</i>   | ENSMUSG00000022324 | 0.93757951   | 4.30E-05 |
| <i>Dap</i>     | ENSMUSG00000039168 | 1.060761224  | 4.45E-05 |
| <i>Lrp8</i>    | ENSMUSG00000028613 | 3.076927513  | 4.48E-05 |
| <i>Mtpn</i>    | ENSMUSG00000029840 | 0.7409373    | 4.50E-05 |
| <i>Cct5</i>    | ENSMUSG00000022234 | 0.789970885  | 4.54E-05 |
| <i>Pdia3</i>   | ENSMUSG00000027248 | 0.814069588  | 4.55E-05 |
| <i>Myo5b</i>   | ENSMUSG00000025885 | -1.07591838  | 4.57E-05 |
| <i>Cmpk1</i>   | ENSMUSG00000028719 | 0.729331642  | 4.57E-05 |
| <i>Il34</i>    | ENSMUSG00000031750 | 1.736196194  | 4.60E-05 |
| <i>Cyb5r3</i>  | ENSMUSG00000018042 | 0.908778077  | 4.61E-05 |
| <i>Ky</i>      | ENSMUSG00000035606 | -2.113931589 | 4.61E-05 |
| <i>Srpx2</i>   | ENSMUSG00000031253 | 1.217986039  | 4.62E-05 |
| <i>Tgfbr3</i>  | ENSMUSG00000029287 | -0.872295846 | 4.71E-05 |
| <i>Gm13339</i> | ENSMUSG00000082884 | -2.612873165 | 4.74E-05 |
| <i>Nuf2</i>    | ENSMUSG00000026683 | 2.544415342  | 4.91E-05 |

|                  |                    |              |          |
|------------------|--------------------|--------------|----------|
| <i>Cnn2</i>      | ENSMUSG00000004665 | 0.774194332  | 4.92E-05 |
| <i>Gnb1</i>      | ENSMUSG00000029064 | 0.743748783  | 4.92E-05 |
| <i>Lyve1</i>     | ENSMUSG00000030787 | 0.923114282  | 4.94E-05 |
| <i>Fcrls</i>     | ENSMUSG00000015852 | 1.042470331  | 5.00E-05 |
| <i>Dpysl3</i>    | ENSMUSG00000024501 | 1.202522954  | 5.06E-05 |
| <i>Abca12</i>    | ENSMUSG00000050296 | -2.468894466 | 5.11E-05 |
| <i>Rgma</i>      | ENSMUSG00000070509 | -1.062393229 | 5.16E-05 |
| <i>Iqsec1</i>    | ENSMUSG00000034312 | -1.010783788 | 5.16E-05 |
| <i>Lmnbl</i>     | ENSMUSG00000024590 | 1.459715437  | 5.18E-05 |
| <i>Ppp1r3d</i>   | ENSMUSG00000049999 | -1.261594712 | 5.23E-05 |
| <i>Fbln5</i>     | ENSMUSG00000021186 | 1.028560124  | 5.23E-05 |
| <i>Ubr2</i>      | ENSMUSG00000023977 | -0.891046088 | 5.27E-05 |
| <i>Eif3d</i>     | ENSMUSG00000016554 | 0.794490993  | 5.32E-05 |
| <i>Hax1</i>      | ENSMUSG00000027944 | 0.833813715  | 5.33E-05 |
| <i>Slmap</i>     | ENSMUSG00000021870 | 0.772173167  | 5.35E-05 |
| <i>Dcun1d2</i>   | ENSMUSG00000038506 | -0.966239249 | 5.41E-05 |
| <i>Rpl10a</i>    | ENSMUSG00000037805 | 0.857995927  | 5.43E-05 |
| <i>Hbb-bt</i>    | ENSMUSG00000073940 | 1.197178887  | 5.44E-05 |
| <i>Anxa13</i>    | ENSMUSG00000055114 | -2.786714981 | 5.45E-05 |
| <i>Palld</i>     | ENSMUSG00000058056 | -0.799675206 | 5.46E-05 |
| <i>Tkt</i>       | ENSMUSG00000021957 | 1.004203743  | 5.46E-05 |
| <i>Has1</i>      | ENSMUSG00000003665 | 3.837181116  | 5.46E-05 |
| <i>Map1b</i>     | ENSMUSG00000052727 | 1.411116985  | 5.52E-05 |
| <i>Mpped2</i>    | ENSMUSG00000016386 | -0.98067986  | 5.54E-05 |
| <i>Bax</i>       | ENSMUSG00000003873 | 1.089503608  | 5.59E-05 |
| <i>Pcdh19</i>    | ENSMUSG00000051323 | 1.210946192  | 5.62E-05 |
| <i>AA414768</i>  | ENSMUSG00000083307 | 1.654516139  | 5.62E-05 |
| <i>Txndc5</i>    | ENSMUSG00000038991 | 0.881548729  | 5.69E-05 |
| <i>Mmp15</i>     | ENSMUSG00000031790 | -1.118266179 | 5.77E-05 |
| <i>Sdha</i>      | ENSMUSG00000021577 | -0.746425645 | 5.80E-05 |
| <i>Adamts1</i>   | ENSMUSG00000022893 | 0.984573992  | 5.81E-05 |
| <i>Dio2</i>      | ENSMUSG00000007682 | 3.635128179  | 5.81E-05 |
| <i>Baspl</i>     | ENSMUSG00000045763 | 1.264249279  | 5.81E-05 |
| <i>Gm40604</i>   | ENSMUSG00000112800 | -2.594640939 | 5.87E-05 |
| <i>Rpl6</i>      | ENSMUSG00000029614 | 0.731350539  | 5.98E-05 |
| <i>Cxcl16</i>    | ENSMUSG00000018920 | 1.128028466  | 6.00E-05 |
| <i>Rps16-ps2</i> | ENSMUSG00000060419 | 0.879807144  | 6.04E-05 |
| <i>Pcolce</i>    | ENSMUSG00000029718 | 0.846899143  | 6.05E-05 |
| <i>Actr2</i>     | ENSMUSG00000020152 | 0.782201953  | 6.09E-05 |
| <i>Lsm14b</i>    | ENSMUSG00000039108 | -0.855055459 | 6.11E-05 |

|                      |                     |              |          |
|----------------------|---------------------|--------------|----------|
| <i>Nans</i>          | ENSMUSG00000028334  | 0.886230727  | 6.14E-05 |
| <i>Cdc42</i>         | ENSMUSG00000006699  | 0.658514014  | 6.16E-05 |
| <i>Rrp12</i>         | ENSMUSG000000035049 | 1.206615847  | 6.16E-05 |
| <i>Fbxo3l</i>        | ENSMUSG000000052934 | -0.894989711 | 6.19E-05 |
| <i>Tes</i>           | ENSMUSG000000029552 | 1.221804024  | 6.21E-05 |
| <i>Casp3</i>         | ENSMUSG000000031628 | 1.214705603  | 6.26E-05 |
| <i>Anp32b</i>        | ENSMUSG000000028333 | 0.753289197  | 6.26E-05 |
| <i>Mfn2</i>          | ENSMUSG000000029020 | -0.888859823 | 6.29E-05 |
| <i>Rps3</i>          | ENSMUSG000000030744 | 0.744403445  | 6.33E-05 |
| <i>Lix1</i>          | ENSMUSG000000047786 | -1.817311568 | 6.35E-05 |
| <i>Ubxn1</i>         | ENSMUSG000000071655 | 0.709328967  | 6.35E-05 |
| <i>Marcks1l</i>      | ENSMUSG000000047945 | 1.203000975  | 6.35E-05 |
| <i>Sh3rf2</i>        | ENSMUSG000000057719 | -1.371037349 | 6.35E-05 |
| <i>Ssr1</i>          | ENSMUSG000000021427 | 0.784347935  | 6.48E-05 |
| <i>Sec61b</i>        | ENSMUSG000000053317 | 1.136801215  | 6.49E-05 |
| <i>1700123M08Rik</i> | ENSMUSG000000085614 | -1.5601323   | 6.53E-05 |
| <i>Dele1</i>         | ENSMUSG000000024442 | -0.861700341 | 6.56E-05 |
| <i>Vegfa</i>         | ENSMUSG000000023951 | 0.775302173  | 6.58E-05 |
| <i>Clec4n</i>        | ENSMUSG000000023349 | 1.229335879  | 6.58E-05 |
| <i>Auh</i>           | ENSMUSG000000021460 | -0.79811363  | 6.59E-05 |
| <i>Arrdc3</i>        | ENSMUSG000000074794 | 0.840312534  | 6.60E-05 |
| <i>Gm6472</i>        | ENSMUSG000000095597 | 0.826009687  | 6.69E-05 |
| <i>Sdc4</i>          | ENSMUSG000000017009 | 0.895973419  | 6.75E-05 |
| <i>mt-Co3</i>        | ENSMUSG000000064358 | -2.192615357 | 6.79E-05 |
| <i>AI662270</i>      | ENSMUSG000000087107 | 1.694658366  | 6.86E-05 |
| <i>Foxo4</i>         | ENSMUSG000000042903 | -0.830457396 | 7.06E-05 |
| <i>Nek2</i>          | ENSMUSG000000026622 | 2.787118381  | 7.08E-05 |
| <i>Mir22hg</i>       | ENSMUSG000000085148 | 1.28101779   | 7.10E-05 |
| <i>Dnal4</i>         | ENSMUSG000000022420 | -0.923171237 | 7.11E-05 |
| <i>Crlf2</i>         | ENSMUSG000000033467 | 0.992785293  | 7.16E-05 |
| <i>Nostrin</i>       | ENSMUSG000000034738 | 1.339164421  | 7.16E-05 |
| <i>Tnfaip8l1</i>     | ENSMUSG000000044469 | 1.66480778   | 7.16E-05 |
| <i>Acox1</i>         | ENSMUSG000000020777 | -0.766342238 | 7.18E-05 |
| <i>Pygm</i>          | ENSMUSG000000032648 | -0.986421496 | 7.20E-05 |
| <i>Esrrg</i>         | ENSMUSG000000026610 | -1.24361538  | 7.23E-05 |
| <i>Ak4</i>           | ENSMUSG000000028527 | 0.794324011  | 7.28E-05 |
| <i>Psmb10</i>        | ENSMUSG000000031897 | 0.866422125  | 7.30E-05 |
| <i>Slc36a2</i>       | ENSMUSG000000020264 | -1.680849306 | 7.30E-05 |
| <i>Sdc1</i>          | ENSMUSG000000020592 | 1.145699644  | 7.48E-05 |
| <i>Atf5</i>          | ENSMUSG000000038539 | 0.780420286  | 7.50E-05 |

|                 |                    |              |          |
|-----------------|--------------------|--------------|----------|
| <i>Slc3a2</i>   | ENSMUSG00000010095 | 0.824211271  | 7.51E-05 |
| <i>Bcas1</i>    | ENSMUSG00000013523 | 3.491613105  | 7.60E-05 |
| <i>Asb18</i>    | ENSMUSG00000067081 | -1.289875759 | 7.63E-05 |
| <i>Leng8</i>    | ENSMUSG00000035545 | -1.243145311 | 7.69E-05 |
| <i>Trim55</i>   | ENSMUSG00000060913 | -0.764555649 | 7.74E-05 |
| <i>Fam131a</i>  | ENSMUSG00000050821 | -1.138318769 | 7.74E-05 |
| <i>Frem1</i>    | ENSMUSG00000059049 | 2.502355246  | 7.83E-05 |
| <i>Kif4</i>     | ENSMUSG00000034311 | 2.342330785  | 8.04E-05 |
| <i>Slc27a1</i>  | ENSMUSG00000031808 | -0.865631252 | 8.04E-05 |
| <i>Ppib</i>     | ENSMUSG00000032383 | 0.883266026  | 8.04E-05 |
| <i>AI506816</i> | ENSMUSG00000105987 | 1.12017342   | 8.09E-05 |
| <i>Mrps34</i>   | ENSMUSG00000038880 | 0.723727808  | 8.10E-05 |
| <i>mt-Tm</i>    | ENSMUSG00000064344 | -2.363755057 | 8.26E-05 |
| <i>H2-T22</i>   | ENSMUSG00000056116 | 0.814404995  | 8.29E-05 |
| <i>Hibadh</i>   | ENSMUSG00000029776 | -0.802364755 | 8.51E-05 |
| <i>Npm1</i>     | ENSMUSG00000057113 | 0.765391834  | 8.52E-05 |
| <i>Edem1</i>    | ENSMUSG00000030104 | 0.898575858  | 8.54E-05 |
| <i>L2hgdh</i>   | ENSMUSG00000020988 | -0.990232504 | 8.59E-05 |
| <i>Nubp1</i>    | ENSMUSG00000022503 | 1.06770218   | 8.67E-05 |
| <i>Fitm2</i>    | ENSMUSG00000048486 | -0.918844762 | 8.67E-05 |
| <i>mt-Nd5</i>   | ENSMUSG00000064367 | -1.145512901 | 8.69E-05 |
| <i>Col6a3</i>   | ENSMUSG00000048126 | 0.954494112  | 8.69E-05 |
| <i>Asb10</i>    | ENSMUSG00000038204 | -0.949914111 | 8.87E-05 |
| <i>Adam15</i>   | ENSMUSG00000028041 | 0.826110171  | 8.94E-05 |
| <i>Glpr1</i>    | ENSMUSG00000056888 | 1.791520777  | 9.01E-05 |
| <i>Cxcr4</i>    | ENSMUSG00000045382 | 1.685998187  | 9.04E-05 |
| <i>Ftl1</i>     | ENSMUSG00000050708 | 0.778677718  | 9.11E-05 |
| <i>Cks1b</i>    | ENSMUSG00000028044 | 1.311450392  | 9.13E-05 |
| <i>Ninj1</i>    | ENSMUSG00000037966 | 0.699219979  | 9.24E-05 |
| <i>Ctsk</i>     | ENSMUSG00000028111 | 1.117524439  | 9.40E-05 |
| <i>Zfp30</i>    | ENSMUSG00000047473 | -1.25754888  | 9.43E-05 |
| <i>Tent5b</i>   | ENSMUSG00000046694 | 2.22113418   | 9.56E-05 |
| <i>Ell2</i>     | ENSMUSG00000001542 | 0.994864886  | 9.60E-05 |
| <i>Slc22a3</i>  | ENSMUSG00000023828 | -1.836470718 | 9.64E-05 |
| <i>Hsd17b7</i>  | ENSMUSG00000026675 | -1.442163041 | 9.74E-05 |
| <i>Kcnv2</i>    | ENSMUSG00000047298 | -2.312093364 | 9.74E-05 |
| <i>Aox3</i>     | ENSMUSG00000064294 | -2.594162935 | 9.74E-05 |
| <i>Lrrc8a</i>   | ENSMUSG00000007476 | 0.953560263  | 9.86E-05 |
| <i>Ddah2</i>    | ENSMUSG00000007039 | 0.822942817  | 9.91E-05 |
| <i>Map7</i>     | ENSMUSG00000019996 | -1.076724288 | 9.96E-05 |

|                      |                    |              |             |
|----------------------|--------------------|--------------|-------------|
| <i>Gm826</i>         | ENSMUSG00000074623 | -1.854150746 | 9.99E-05    |
| <i>Ssu2</i>          | ENSMUSG00000034387 | 1.744520428  | 0.000100979 |
| <i>Pamr1</i>         | ENSMUSG00000027188 | 1.442207684  | 0.000101479 |
| <i>Nudt6</i>         | ENSMUSG00000050174 | -1.305114648 | 0.000102303 |
| <i>Smim8</i>         | ENSMUSG00000028295 | -0.77796519  | 0.0001024   |
| <i>Galm</i>          | ENSMUSG00000035473 | -1.052715333 | 0.0001024   |
| <i>Dnajb4</i>        | ENSMUSG00000028035 | 0.799668691  | 0.000102672 |
| <i>Acad11</i>        | ENSMUSG00000090150 | -1.084732814 | 0.000102971 |
| <i>AC105304.1</i>    | ENSMUSG00000117110 | 6.174955464  | 0.000103248 |
| <i>Dera</i>          | ENSMUSG00000030225 | 1.141257288  | 0.000105357 |
| <i>Cdv3</i>          | ENSMUSG00000032803 | 0.73861362   | 0.000106376 |
| <i>Cnst</i>          | ENSMUSG00000038949 | -1.091648775 | 0.000108248 |
| <i>Tcf19</i>         | ENSMUSG00000050410 | 1.454493961  | 0.000108248 |
| <i>Cst6</i>          | ENSMUSG00000024846 | 1.537354611  | 0.000109393 |
| <i>Chd6</i>          | ENSMUSG00000057133 | -1.129539479 | 0.000110687 |
| <i>Bcat2</i>         | ENSMUSG00000030826 | -0.854118049 | 0.000111356 |
| <i>Per3</i>          | ENSMUSG00000028957 | -0.997192104 | 0.000111797 |
| <i>Aldh1b1</i>       | ENSMUSG00000035561 | -1.166657249 | 0.000112397 |
| <i>Nt5c3</i>         | ENSMUSG00000029780 | -0.744316174 | 0.000112615 |
| <i>Sdcbp</i>         | ENSMUSG00000028249 | 0.68030449   | 0.000112781 |
| <i>Synpo2</i>        | ENSMUSG00000050315 | -0.872030496 | 0.000112781 |
| <i>Upp1</i>          | ENSMUSG00000020407 | 1.348758602  | 0.000112869 |
| <i>Klhl21</i>        | ENSMUSG00000073700 | -0.939146967 | 0.000113385 |
| <i>Lum</i>           | ENSMUSG00000036446 | 0.762133301  | 0.00011352  |
| <i>Gm14005</i>       | ENSMUSG00000074813 | 1.743756839  | 0.00011352  |
| <i>Gm48882</i>       | ENSMUSG00000112593 | -1.544659664 | 0.000113753 |
| <i>Mapre1</i>        | ENSMUSG00000027479 | 0.727685037  | 0.000114064 |
| <i>Plekhh3</i>       | ENSMUSG00000035172 | -0.988397449 | 0.000114064 |
| <i>Ywhaz</i>         | ENSMUSG00000022285 | 0.699675293  | 0.000114403 |
| <i>Slc10a6</i>       | ENSMUSG00000029321 | 1.367200475  | 0.000114763 |
| <i>Crispld1</i>      | ENSMUSG00000025776 | 2.078403359  | 0.000115859 |
| <i>Delk1</i>         | ENSMUSG00000027797 | 1.27304377   | 0.000115859 |
| <i>1810014B01Rik</i> | ENSMUSG00000097412 | -1.331894755 | 0.000116234 |
| <i>Cd14</i>          | ENSMUSG00000051439 | 0.95973642   | 0.00011691  |
| <i>Fbxo21</i>        | ENSMUSG00000032898 | -0.947688909 | 0.00011691  |
| <i>Ankrd23</i>       | ENSMUSG00000067653 | 1.187870943  | 0.000117977 |
| <i>AI464131</i>      | ENSMUSG00000046312 | -1.477775898 | 0.000117977 |
| <i>Uxs1</i>          | ENSMUSG00000057363 | 1.004221926  | 0.000119455 |
| <i>Wnk4</i>          | ENSMUSG00000035112 | -1.463317934 | 0.000119809 |
| <i>Nrg2</i>          | ENSMUSG00000060275 | -2.630951901 | 0.000119844 |

|                  |                    |              |             |
|------------------|--------------------|--------------|-------------|
| <i>Fam78a</i>    | ENSMUSG00000050592 | -1.124255008 | 0.000120153 |
| <i>Tmem263</i>   | ENSMUSG00000060935 | 0.96480215   | 0.000120584 |
| <i>Slc25a38</i>  | ENSMUSG00000032519 | -0.869125597 | 0.000122088 |
| <i>Ndc80</i>     | ENSMUSG00000024056 | 2.423154708  | 0.000122273 |
| <i>Sergef</i>    | ENSMUSG00000030839 | 1.245257306  | 0.000122273 |
| <i>Gm15972</i>   | ENSMUSG00000086287 | -2.073687742 | 0.000122508 |
| <i>Rpl7</i>      | ENSMUSG00000043716 | 0.732676341  | 0.000123232 |
| <i>Hist2h2be</i> | ENSMUSG00000068854 | -1.354971961 | 0.000124167 |
| <i>Numa1</i>     | ENSMUSG00000066306 | -0.797316904 | 0.000124746 |
| <i>Ccne2</i>     | ENSMUSG00000028212 | 1.429812172  | 0.00012482  |
| <i>R3hdm2</i>    | ENSMUSG00000025404 | -0.840435036 | 0.00012482  |
| <i>Trim59</i>    | ENSMUSG00000034317 | 1.342907783  | 0.000126783 |
| <i>Tagln2</i>    | ENSMUSG00000026547 | 0.954159223  | 0.000126924 |
| <i>Ism1</i>      | ENSMUSG00000074766 | 1.672658909  | 0.000128065 |
| <i>F2r</i>       | ENSMUSG00000048376 | 0.915997412  | 0.000128451 |
| <i>Pcmt2</i>     | ENSMUSG00000027589 | -0.849265634 | 0.000128451 |
| <i>Itgav</i>     | ENSMUSG00000027087 | 1.030798434  | 0.000128451 |
| <i>Mybl1</i>     | ENSMUSG00000025912 | 2.380384328  | 0.000128692 |
| <i>Gng11</i>     | ENSMUSG00000032766 | 0.922982781  | 0.000128692 |
| <i>Slc25a13</i>  | ENSMUSG00000015112 | -0.916356827 | 0.000129146 |
| <i>Edn1</i>      | ENSMUSG00000021367 | 1.497376085  | 0.00013157  |
| <i>Cebpg</i>     | ENSMUSG00000056216 | 0.91684615   | 0.000132187 |
| <i>Isg15</i>     | ENSMUSG00000035692 | 1.159210154  | 0.000133968 |
| <i>Fcgr3</i>     | ENSMUSG00000059498 | 1.041077436  | 0.000134132 |
| <i>Axin2</i>     | ENSMUSG00000000142 | -2.07183498  | 0.000134132 |
| <i>Tcp1l12</i>   | ENSMUSG00000020034 | -0.981214793 | 0.000134187 |
| <i>Pam</i>       | ENSMUSG00000026335 | 0.764379723  | 0.000135689 |
| <i>Yipf7</i>     | ENSMUSG00000029158 | -0.997783466 | 0.000138131 |
| <i>Chaer1</i>    | ENSMUSG00000106783 | -4.791012668 | 0.000139023 |
| <i>Grhl2</i>     | ENSMUSG00000022286 | -3.948260681 | 0.000139023 |
| <i>Slc39a6</i>   | ENSMUSG00000024270 | 1.382031966  | 0.000140086 |
| <i>Fmn13</i>     | ENSMUSG00000023008 | 0.899832997  | 0.000140086 |
| <i>Cul9</i>      | ENSMUSG00000040327 | -0.97988309  | 0.00014023  |
| <i>Adamts7</i>   | ENSMUSG00000032363 | -1.606884184 | 0.000140521 |
| <i>Nsa2</i>      | ENSMUSG00000060739 | 0.754882961  | 0.000140561 |
| <i>B4galnt1</i>  | ENSMUSG00000006731 | 2.236516517  | 0.000141619 |
| <i>Fgd4</i>      | ENSMUSG00000022788 | -1.106356871 | 0.000142268 |
| <i>Wdr1</i>      | ENSMUSG00000005103 | 0.692222334  | 0.000143472 |
| <i>Rnf207</i>    | ENSMUSG00000058498 | -1.151991286 | 0.000143472 |
| <i>Nip7</i>      | ENSMUSG00000031917 | 0.868193244  | 0.000145477 |

|                      |                    |              |             |
|----------------------|--------------------|--------------|-------------|
| <i>Ecsr</i>          | ENSMUSG00000073599 | 0.916766728  | 0.000146147 |
| <i>Slc25a16</i>      | ENSMUSG00000071253 | -0.833230489 | 0.000148845 |
| <i>Ccl17</i>         | ENSMUSG00000031780 | 3.710638489  | 0.000149288 |
| <i>F830016B08Rik</i> | ENSMUSG00000090942 | -2.209342938 | 0.000150275 |
| <i>Bean1</i>         | ENSMUSG00000031872 | 2.018438196  | 0.000150275 |
| <i>Rps5</i>          | ENSMUSG00000012848 | 0.748254965  | 0.000151536 |
| <i>Gm10156</i>       | ENSMUSG00000066245 | 1.733016287  | 0.000151536 |
| <i>Strip2</i>        | ENSMUSG00000039629 | -0.886836007 | 0.000151845 |
| <i>Gm6377</i>        | ENSMUSG00000048621 | 2.49656776   | 0.000152214 |
| <i>Rrm1</i>          | ENSMUSG00000030978 | 0.998165288  | 0.000153266 |
| <i>Mylk4</i>         | ENSMUSG00000044951 | -1.252804454 | 0.000153322 |
| <i>Aldoa</i>         | ENSMUSG00000030695 | 0.79919769   | 0.000154398 |
| <i>Lama5</i>         | ENSMUSG00000015647 | -1.094295776 | 0.000154488 |
| <i>Tmed3</i>         | ENSMUSG00000032353 | 0.827032169  | 0.000154702 |
| <i>Gm9780</i>        | ENSMUSG00000094800 | 1.700214932  | 0.000154702 |
| <i>Ifi30</i>         | ENSMUSG00000031838 | 1.114396586  | 0.000154702 |
| <i>Drg1</i>          | ENSMUSG00000020457 | 0.683105647  | 0.000154702 |
| <i>Gpr176</i>        | ENSMUSG00000040133 | 3.403658604  | 0.000154702 |
| <i>Mgat2</i>         | ENSMUSG00000043998 | 0.754830272  | 0.000157822 |
| <i>Exoc5</i>         | ENSMUSG00000061244 | 0.843070037  | 0.000159033 |
| <i>Ift122</i>        | ENSMUSG00000030323 | 1.122071062  | 0.000159532 |
| <i>Kif13a</i>        | ENSMUSG00000021375 | -0.851981253 | 0.000159717 |
| <i>Sh2b1</i>         | ENSMUSG00000030733 | -0.826373575 | 0.000160527 |
| <i>Nt5c</i>          | ENSMUSG00000020736 | 1.049244777  | 0.000161262 |
| <i>P4hb</i>          | ENSMUSG00000025130 | 0.87033207   | 0.000161262 |
| <i>Nfs1</i>          | ENSMUSG00000027618 | -0.741319823 | 0.000161262 |
| <i>Oas1a</i>         | ENSMUSG00000052776 | 1.063757395  | 0.000162011 |
| <i>Arhgdia</i>       | ENSMUSG00000025132 | 0.726678269  | 0.000162242 |
| <i>Lmtk2</i>         | ENSMUSG00000038970 | -1.21176516  | 0.000162882 |
| <i>Rpl24</i>         | ENSMUSG00000098274 | 1.153350314  | 0.000163063 |
| <i>Rnh1</i>          | ENSMUSG00000038650 | 0.742654696  | 0.000163258 |
| <i>Echs1</i>         | ENSMUSG00000025465 | -0.771113442 | 0.000163779 |
| <i>Myl9</i>          | ENSMUSG00000067818 | 0.975365785  | 0.000164303 |
| <i>Wwtr1</i>         | ENSMUSG00000027803 | 0.725845511  | 0.000164779 |
| <i>H2afx</i>         | ENSMUSG00000049932 | 1.021756577  | 0.000166453 |
| <i>Gm47985</i>       | ENSMUSG00000114212 | 2.546883876  | 0.000166614 |
| <i>Gm19277</i>       | ENSMUSG00000115924 | -1.974154043 | 0.000167209 |
| <i>Cntn5</i>         | ENSMUSG00000039488 | -3.374525907 | 0.000169941 |
| <i>Lgr6</i>          | ENSMUSG00000042793 | -1.310044826 | 0.00017165  |
| <i>Gzmm</i>          | ENSMUSG00000054206 | -1.298100391 | 0.000173287 |

|                      |                    |              |             |
|----------------------|--------------------|--------------|-------------|
| <i>Gm27252</i>       | ENSMUSG00000098708 | -2.101748683 | 0.000173287 |
| <i>Camta2</i>        | ENSMUSG00000040712 | -0.797479434 | 0.000174688 |
| <i>2010111101Rik</i> | ENSMUSG00000021458 | 0.829764294  | 0.000175195 |
| <i>Esco2</i>         | ENSMUSG00000022034 | 2.862116432  | 0.000175644 |
| <i>Rras</i>          | ENSMUSG00000038387 | 0.836933427  | 0.000176266 |
| <i>Rpl17-ps3</i>     | ENSMUSG00000113948 | 0.711833545  | 0.000176266 |
| <i>Epb41l3</i>       | ENSMUSG00000024044 | -1.546288962 | 0.000176878 |
| <i>Gm35177</i>       | ENSMUSG00000110922 | -6.429040425 | 0.000177386 |
| <i>9-Sep</i>         | ENSMUSG00000059248 | 0.755976197  | 0.000177386 |
| <i>Pts</i>           | ENSMUSG00000032067 | -0.834189968 | 0.000177386 |
| <i>Lmo4</i>          | ENSMUSG00000028266 | 0.734589636  | 0.000177386 |
| <i>Msn</i>           | ENSMUSG00000031207 | 0.799553541  | 0.000177386 |
| <i>Dtl</i>           | ENSMUSG00000037474 | 2.706604493  | 0.000180376 |
| <i>Shisa4</i>        | ENSMUSG00000041889 | 1.17966289   | 0.000180376 |
| <i>Neat1</i>         | ENSMUSG00000092274 | -1.151454303 | 0.000181984 |
| <i>Aldh1a1</i>       | ENSMUSG00000053279 | 0.964640861  | 0.000185192 |
| <i>Atp6ap2</i>       | ENSMUSG00000031007 | 0.842076768  | 0.000186203 |
| <i>Gpr155</i>        | ENSMUSG00000041762 | -1.32876739  | 0.000189622 |
| <i>Rcc2</i>          | ENSMUSG00000040945 | 0.876741319  | 0.000189798 |
| <i>Rras2</i>         | ENSMUSG00000055723 | 0.76401495   | 0.000189934 |
| <i>Ddc</i>           | ENSMUSG00000020182 | -1.38250219  | 0.000191508 |
| <i>Mir99ahg</i>      | ENSMUSG00000090386 | 1.1102693    | 0.000192667 |
| <i>Zfp46</i>         | ENSMUSG00000051351 | -1.027056956 | 0.000193753 |
| <i>Pccb</i>          | ENSMUSG00000032527 | -0.698652862 | 0.000195815 |
| <i>H2-DMa</i>        | ENSMUSG00000037649 | 1.100925746  | 0.000196625 |
| <i>Rrm2b</i>         | ENSMUSG00000022292 | -0.817929696 | 0.000196805 |
| <i>Cc2d2a</i>        | ENSMUSG00000039765 | -1.122445661 | 0.000196984 |
| <i>Gm15543</i>       | ENSMUSG00000086863 | -1.228508435 | 0.00019774  |
| <i>Phyh</i>          | ENSMUSG00000026664 | -0.836723264 | 0.00019792  |
| <i>Oxsm</i>          | ENSMUSG00000021786 | -0.924668801 | 0.000199967 |
| <i>Gm13680</i>       | ENSMUSG00000081400 | 1.044522345  | 0.000203116 |
| <i>Arpc2</i>         | ENSMUSG00000006304 | 0.672567384  | 0.000203481 |
| <i>Mphosph10</i>     | ENSMUSG00000030521 | 0.892693029  | 0.00020419  |
| <i>Pum3</i>          | ENSMUSG00000041360 | 0.773830198  | 0.000204605 |
| <i>Apbb1</i>         | ENSMUSG00000037032 | -0.905188291 | 0.000204899 |
| <i>Cluh</i>          | ENSMUSG00000020741 | -0.804196519 | 0.000204902 |
| <i>Prkar1a</i>       | ENSMUSG00000020612 | 0.621586336  | 0.000206102 |
| <i>Hmgn3</i>         | ENSMUSG00000066456 | 1.245901226  | 0.000206102 |
| <i>Fam117b</i>       | ENSMUSG00000041040 | 0.876595231  | 0.000206585 |
| <i>Gid4</i>          | ENSMUSG00000018415 | -0.726585791 | 0.000209714 |



|                      |                    |              |             |
|----------------------|--------------------|--------------|-------------|
| <i>Aplp2</i>         | ENSMUSG00000031996 | -0.726345216 | 0.000210175 |
| <i>Gm8430</i>        | ENSMUSG00000055093 | 1.074004178  | 0.000210175 |
| <i>Emilin1</i>       | ENSMUSG00000029163 | 0.799660093  | 0.000211184 |
| <i>3425401B19Rik</i> | ENSMUSG00000071540 | -1.148710484 | 0.000215128 |
| <i>Cd72</i>          | ENSMUSG00000028459 | 1.777472908  | 0.000215314 |
| <i>Rpl19</i>         | ENSMUSG00000017404 | 0.715816201  | 0.000215499 |
| <i>Fn3k</i>          | ENSMUSG00000025175 | -0.977813005 | 0.000215516 |
| <i>Dpp4</i>          | ENSMUSG00000035000 | -0.975539117 | 0.000217099 |
| <i>1700025G04Rik</i> | ENSMUSG00000032666 | 0.788062319  | 0.000218142 |
| <i>Fam114a1</i>      | ENSMUSG00000029185 | 0.893863756  | 0.00021981  |
| <i>Piezo2</i>        | ENSMUSG00000041482 | 2.34241978   | 0.000219982 |
| <i>Tbrg1</i>         | ENSMUSG00000011114 | 0.807751257  | 0.000220928 |
| <i>Pea15a</i>        | ENSMUSG00000013698 | 0.712824257  | 0.000221491 |
| <i>Nbl1</i>          | ENSMUSG00000041120 | 0.827594761  | 0.000223625 |
| <i>Hectd4</i>        | ENSMUSG00000042744 | -1.323369635 | 0.000223707 |
| <i>Pde2a</i>         | ENSMUSG00000110195 | -2.460329707 | 0.000223853 |
| <i>Nfkb2</i>         | ENSMUSG00000025225 | 0.875363676  | 0.000224136 |
| <i>Tceal1</i>        | ENSMUSG00000033813 | 0.814236001  | 0.000224136 |
| <i>Mvp</i>           | ENSMUSG00000030681 | 0.811059052  | 0.000229252 |
| <i>Bcl2a1d</i>       | ENSMUSG00000099974 | 2.47385179   | 0.00023614  |
| <i>Ier5</i>          | ENSMUSG00000056708 | 1.178234042  | 0.00023614  |
| <i>Cep55</i>         | ENSMUSG00000024989 | 2.106963168  | 0.000236381 |
| <i>Skal</i>          | ENSMUSG00000036223 | 2.939008556  | 0.000236986 |
| <i>Osbpl1a</i>       | ENSMUSG00000044252 | -0.786046678 | 0.000238155 |
| <i>Runx3</i>         | ENSMUSG00000070691 | 2.527166412  | 0.000238313 |
| <i>Gm36377</i>       | ENSMUSG00000113909 | 6.333989748  | 0.000238673 |
| <i>Ch25h</i>         | ENSMUSG00000050370 | 2.261355686  | 0.000239183 |
| <i>Crat</i>          | ENSMUSG00000026853 | -0.876036392 | 0.00023971  |
| <i>Smim19</i>        | ENSMUSG00000031534 | -0.790869136 | 0.00024107  |
| <i>Cope</i>          | ENSMUSG00000055681 | 0.673991768  | 0.000242024 |
| <i>Bgn</i>           | ENSMUSG00000031375 | 0.877221011  | 0.000242024 |
| <i>Prnp</i>          | ENSMUSG00000079037 | 0.685726585  | 0.000242398 |
| <i>Arfgap3</i>       | ENSMUSG00000054277 | 1.08586968   | 0.000243569 |
| <i>Fam162a</i>       | ENSMUSG00000003955 | 0.874928041  | 0.000244213 |
| <i>Fam129b</i>       | ENSMUSG00000026796 | 0.720263432  | 0.000244797 |
| <i>Oplah</i>         | ENSMUSG00000022562 | -0.835767828 | 0.000244797 |
| <i>Map3k4</i>        | ENSMUSG00000014426 | -0.881797639 | 0.000244797 |
| <i>Twfl</i>          | ENSMUSG00000022451 | 0.830535821  | 0.00024495  |
| <i>Phkg1</i>         | ENSMUSG00000025537 | -1.594751257 | 0.00024495  |
| <i>Gpr137c</i>       | ENSMUSG00000049092 | -1.766008063 | 0.00024495  |

|                      |                    |              |             |
|----------------------|--------------------|--------------|-------------|
| <i>Tlr4</i>          | ENSMUSG00000039005 | 0.954075891  | 0.00024495  |
| <i>Fam107a</i>       | ENSMUSG00000021750 | 1.184025232  | 0.000247396 |
| <i>Cmss1</i>         | ENSMUSG00000022748 | -1.115170298 | 0.000247796 |
| <i>Garem2</i>        | ENSMUSG00000044576 | 5.972407883  | 0.000249558 |
| <i>Setd1b</i>        | ENSMUSG00000038384 | -1.296920375 | 0.000249558 |
| <i>Gm45670</i>       | ENSMUSG00000109635 | -1.041440929 | 0.000258956 |
| <i>Atxn10</i>        | ENSMUSG00000016541 | 0.93295456   | 0.000258956 |
| <i>Mcee</i>          | ENSMUSG00000033429 | -0.787805686 | 0.000258956 |
| <i>Hcn4</i>          | ENSMUSG00000032338 | -2.108816201 | 0.000259326 |
| <i>Tnmd</i>          | ENSMUSG00000031250 | 5.92033147   | 0.000262712 |
| <i>Rit1</i>          | ENSMUSG00000028057 | -0.749251877 | 0.000264111 |
| <i>Klrb1a</i>        | ENSMUSG00000030361 | 6.386504613  | 0.000264722 |
| <i>Zfp445</i>        | ENSMUSG00000047036 | -0.832882631 | 0.000265248 |
| <i>E030044B06Rik</i> | ENSMUSG00000097740 | -6.358287039 | 0.000267475 |
| <i>Pkm</i>           | ENSMUSG00000032294 | 0.748617133  | 0.000267575 |
| <i>Gm14097</i>       | ENSMUSG00000084839 | -2.534896431 | 0.000267575 |
| <i>Bola3</i>         | ENSMUSG00000045160 | -0.958485386 | 0.000267575 |
| <i>Tbc1d16</i>       | ENSMUSG00000039976 | -1.031882917 | 0.00026813  |
| <i>Myrf</i>          | ENSMUSG00000036098 | -1.394853591 | 0.000269673 |
| <i>Nufip1</i>        | ENSMUSG00000022009 | 1.077829776  | 0.000270091 |
| <i>Nsun2</i>         | ENSMUSG00000021595 | 0.800139024  | 0.000271507 |
| <i>Lockd</i>         | ENSMUSG00000098318 | 3.106664873  | 0.000271963 |
| <i>Gm9892</i>        | ENSMUSG00000052825 | 0.939809863  | 0.000271963 |
| <i>Ice1</i>          | ENSMUSG00000034525 | -0.925559404 | 0.000271963 |
| <i>Coq2</i>          | ENSMUSG00000029319 | -0.755241183 | 0.000274267 |
| <i>Tmem150c</i>      | ENSMUSG00000050640 | -1.782753709 | 0.000275712 |
| <i>Wdr75</i>         | ENSMUSG00000025995 | 0.845581168  | 0.000275712 |
| <i>Pcna</i>          | ENSMUSG00000027342 | 0.797275072  | 0.000278766 |
| <i>Efemp1</i>        | ENSMUSG00000020467 | -1.130966568 | 0.000278766 |
| <i>Thsd4</i>         | ENSMUSG00000032289 | -1.530076277 | 0.000282864 |
| <i>Mcm3</i>          | ENSMUSG00000041859 | 1.095857146  | 0.000286209 |
| <i>Dixdc1</i>        | ENSMUSG00000032064 | -1.756193466 | 0.000286727 |
| <i>Hbb-bs</i>        | ENSMUSG00000052305 | 1.083686857  | 0.000288823 |
| <i>Gramd4</i>        | ENSMUSG00000035900 | -0.89073047  | 0.000289878 |
| <i>Abhd17a</i>       | ENSMUSG00000003346 | 0.678777784  | 0.000290331 |
| <i>Castor1</i>       | ENSMUSG00000020424 | 1.109594661  | 0.000290331 |
| <i>4921504A21Rik</i> | ENSMUSG00000097626 | -2.010676943 | 0.000294264 |
| <i>Dus4l</i>         | ENSMUSG00000020648 | -1.318177976 | 0.000294264 |
| <i>Dcaf4</i>         | ENSMUSG00000021222 | -1.058004159 | 0.000296342 |
| <i>Ptges3</i>        | ENSMUSG00000071072 | 0.759355093  | 0.000296897 |

|                      |                    |              |             |
|----------------------|--------------------|--------------|-------------|
| <i>Ltbp1</i>         | ENSMUSG00000001870 | -0.765683293 | 0.000297105 |
| <i>Dnajc2</i>        | ENSMUSG00000029014 | 0.741902366  | 0.000298202 |
| <i>Col15a1</i>       | ENSMUSG00000028339 | 0.816323656  | 0.000298804 |
| <i>Rps15a</i>        | ENSMUSG00000008683 | 0.684323226  | 0.000300563 |
| <i>Eef1b2</i>        | ENSMUSG00000025967 | 0.674231027  | 0.000301515 |
| <i>Gm11382</i>       | ENSMUSG00000074973 | 5.223035374  | 0.000304235 |
| <i>Ech1</i>          | ENSMUSG00000053898 | -0.761446562 | 0.000305527 |
| <i>E330011O21Rik</i> | ENSMUSG00000109841 | -1.709267938 | 0.000305981 |
| <i>Lamb2</i>         | ENSMUSG00000052911 | -0.736344169 | 0.000307686 |
| <i>Gm44386</i>       | ENSMUSG00000107689 | -1.107953053 | 0.000308423 |
| <i>Pex11a</i>        | ENSMUSG00000030545 | -0.956794126 | 0.000308683 |
| <i>Gca</i>           | ENSMUSG00000026893 | -1.039771637 | 0.000311298 |
| <i>Blcap</i>         | ENSMUSG00000067787 | -0.841421988 | 0.000311381 |
| <i>Spire1</i>        | ENSMUSG00000024533 | 1.243020878  | 0.000313017 |
| <i>Lynx1</i>         | ENSMUSG00000022594 | -0.758795346 | 0.000313585 |
| <i>Adss</i>          | ENSMUSG00000015961 | 0.926058961  | 0.000313682 |
| <i>P2ry6</i>         | ENSMUSG00000048779 | 0.909072134  | 0.000314661 |
| <i>Agpat4</i>        | ENSMUSG00000023827 | 1.113208064  | 0.000315115 |
| <i>Tnni3</i>         | ENSMUSG00000035458 | -0.748180094 | 0.000320933 |
| <i>Coll4a1</i>       | ENSMUSG00000022371 | 1.039547653  | 0.000321484 |
| <i>Cd24a</i>         | ENSMUSG00000047139 | 1.337707972  | 0.000323449 |
| <i>Grk5</i>          | ENSMUSG00000003228 | 0.866141393  | 0.000323584 |
| <i>Brcal</i>         | ENSMUSG00000017146 | 2.716505542  | 0.000325365 |
| <i>Nadk2</i>         | ENSMUSG00000022253 | -0.789781309 | 0.000326058 |
| <i>Dclre1b</i>       | ENSMUSG00000027845 | 1.252176753  | 0.000326058 |
| <i>Heyl</i>          | ENSMUSG00000032744 | 1.040418874  | 0.000326058 |
| <i>Tgfb2</i>         | ENSMUSG00000039239 | 1.161424085  | 0.000326064 |
| <i>Aida</i>          | ENSMUSG00000042901 | 0.764429269  | 0.000327698 |
| <i>Ccl6</i>          | ENSMUSG00000018927 | 0.976986274  | 0.000330605 |
| <i>Tacc2</i>         | ENSMUSG00000030852 | -0.739548022 | 0.000331078 |
| <i>Ramp3</i>         | ENSMUSG00000041046 | 1.202683583  | 0.000333032 |
| <i>Ablim1</i>        | ENSMUSG00000025085 | -0.733672669 | 0.000337157 |
| <i>Cdnf</i>          | ENSMUSG00000039496 | -1.210373947 | 0.000337205 |
| <i>Arhgap11a</i>     | ENSMUSG00000041219 | 1.45909038   | 0.000337743 |
| <i>Rps26</i>         | ENSMUSG00000025362 | 0.81885312   | 0.000338098 |
| <i>Rdm1</i>          | ENSMUSG00000010362 | -0.824530705 | 0.000344204 |
| <i>Scgb1c1</i>       | ENSMUSG00000038801 | -1.258528038 | 0.000346587 |
| <i>Rab3a</i>         | ENSMUSG00000031840 | -1.005731182 | 0.000348844 |
| <i>Rpl5</i>          | ENSMUSG00000058558 | 0.669531474  | 0.000354693 |
| <i>Mrgprh</i>        | ENSMUSG00000059408 | -2.418006509 | 0.000357271 |

|                      |                    |              |             |
|----------------------|--------------------|--------------|-------------|
| <i>Ttn</i>           | ENSMUSG00000051747 | -0.906550604 | 0.00036022  |
| <i>Tpd52</i>         | ENSMUSG00000027506 | 0.892520119  | 0.00036022  |
| <i>Mcrip1</i>        | ENSMUSG00000061111 | 0.7969228    | 0.00036167  |
| <i>Ass1</i>          | ENSMUSG00000076441 | 1.320969019  | 0.000361886 |
| <i>Spta1</i>         | ENSMUSG00000026532 | -1.100969323 | 0.000362243 |
| <i>Trim47</i>        | ENSMUSG00000020773 | 0.830078266  | 0.000363609 |
| <i>Itih5</i>         | ENSMUSG00000025780 | 1.16991427   | 0.000365012 |
| <i>Ddah1</i>         | ENSMUSG00000028194 | 2.478770614  | 0.000367647 |
| <i>Xbp1</i>          | ENSMUSG00000020484 | 0.74727034   | 0.000367674 |
| <i>Adi1</i>          | ENSMUSG00000020629 | -0.88030003  | 0.000370578 |
| <i>Dusp1</i>         | ENSMUSG00000024190 | 0.977680826  | 0.000370618 |
| <i>mt-Nd4l</i>       | ENSMUSG00000065947 | -2.903296435 | 0.000371757 |
| <i>Lpcat2</i>        | ENSMUSG00000033192 | 1.57433145   | 0.000371757 |
| <i>D10Jhu81e</i>     | ENSMUSG00000053329 | -0.881365161 | 0.000375308 |
| <i>Gnai3</i>         | ENSMUSG00000000001 | 0.703741621  | 0.000375308 |
| <i>Clu</i>           | ENSMUSG00000022037 | -0.722626929 | 0.000383291 |
| <i>H2-DMb1</i>       | ENSMUSG00000079547 | 1.179390822  | 0.000387753 |
| <i>Melk</i>          | ENSMUSG00000035683 | 2.782945927  | 0.00038845  |
| <i>Vegfb</i>         | ENSMUSG00000024962 | -0.598271996 | 0.000391488 |
| <i>Arell</i>         | ENSMUSG00000042350 | -1.111788349 | 0.000391488 |
| <i>Tef</i>           | ENSMUSG00000022389 | -0.677214465 | 0.000391763 |
| <i>Suox</i>          | ENSMUSG00000049858 | -1.104365874 | 0.000392681 |
| <i>Mpv17</i>         | ENSMUSG00000107283 | -0.706085174 | 0.000397716 |
| <i>Stat5a</i>        | ENSMUSG00000004043 | -0.961274781 | 0.00039827  |
| <i>Erp29</i>         | ENSMUSG00000029616 | 0.703495438  | 0.000403179 |
| <i>Ttk</i>           | ENSMUSG00000038379 | 4.03711512   | 0.000403931 |
| <i>Kif5b</i>         | ENSMUSG00000006740 | 0.630939969  | 0.000404279 |
| <i>Gm13456</i>       | ENSMUSG00000082536 | 1.120715491  | 0.000404279 |
| <i>Kctd11</i>        | ENSMUSG00000046731 | 1.150664126  | 0.000404279 |
| <i>Slc11a1</i>       | ENSMUSG00000026177 | 0.977812705  | 0.000410106 |
| <i>Nudt5</i>         | ENSMUSG00000025817 | 0.936796254  | 0.000410686 |
| <i>Frmd5</i>         | ENSMUSG00000027238 | 0.77851802   | 0.00041221  |
| <i>6430710C18Rik</i> | ENSMUSG00000085427 | -5.8571592   | 0.000415315 |
| <i>Acads</i>         | ENSMUSG00000029545 | -0.773438081 | 0.000416672 |
| <i>Dusp3</i>         | ENSMUSG00000003518 | 0.755976017  | 0.000416962 |
| <i>Atp1a2</i>        | ENSMUSG00000007097 | -1.104746788 | 0.000418605 |
| <i>Bak1</i>          | ENSMUSG00000057789 | 0.792979957  | 0.000418605 |
| <i>Ostn</i>          | ENSMUSG00000052276 | 6.188176022  | 0.000418748 |
| <i>Raf1</i>          | ENSMUSG00000000441 | -0.899105756 | 0.000419355 |
| <i>Snta1</i>         | ENSMUSG00000027488 | 0.842397067  | 0.000422016 |

|                 |                    |              |             |
|-----------------|--------------------|--------------|-------------|
| <i>Hsd17b10</i> | ENSMUSG00000025260 | -0.636670174 | 0.000422016 |
| <i>Mipep</i>    | ENSMUSG00000021993 | -0.67570873  | 0.000426332 |
| <i>Pcx</i>      | ENSMUSG00000024892 | -0.869376811 | 0.000426332 |
| <i>Fitm1</i>    | ENSMUSG00000022215 | -1.104305872 | 0.000426332 |
| <i>Gap43</i>    | ENSMUSG00000047261 | 2.319482887  | 0.000427504 |
| <i>Macf1</i>    | ENSMUSG00000028649 | -0.725908603 | 0.000429035 |
| <i>Myzap</i>    | ENSMUSG00000041361 | -0.622676484 | 0.000432837 |
| <i>Peg13</i>    | ENSMUSG00000106847 | -0.859440608 | 0.000433531 |
| <i>Mdfic</i>    | ENSMUSG00000041390 | 0.824403004  | 0.000433531 |
| <i>Sort1</i>    | ENSMUSG00000068747 | -1.079925075 | 0.000435347 |
| <i>Slc46a3</i>  | ENSMUSG00000029650 | -1.072292167 | 0.000435557 |
| <i>Ckb</i>      | ENSMUSG00000001270 | 0.791920214  | 0.000440762 |
| <i>Acaa2</i>    | ENSMUSG00000036880 | -0.824465558 | 0.000447429 |
| <i>Osgepl1</i>  | ENSMUSG00000026096 | -0.896659618 | 0.000451259 |
| <i>Huwe1</i>    | ENSMUSG00000025261 | -0.888761559 | 0.000452448 |
| <i>Gm34934</i>  | ENSMUSG00000115100 | -1.202524097 | 0.000460464 |
| <i>Ccbe1</i>    | ENSMUSG00000046318 | -1.123748305 | 0.000465985 |
| <i>Art3</i>     | ENSMUSG00000034842 | -0.7872147   | 0.00046714  |
| <i>Pthr1</i>    | ENSMUSG00000053746 | 1.406416489  | 0.000476592 |
| <i>Cmtm8</i>    | ENSMUSG00000041012 | -1.100397376 | 0.000482335 |
| <i>Aes</i>      | ENSMUSG00000054452 | -0.61463961  | 0.000482335 |
| <i>Etf1</i>     | ENSMUSG00000024360 | 0.667818358  | 0.000482595 |
| <i>Gabbr2</i>   | ENSMUSG00000023267 | -2.951621502 | 0.000483208 |
| <i>Dgat2</i>    | ENSMUSG00000030747 | -0.818834106 | 0.000484138 |
| <i>Nxn</i>      | ENSMUSG00000020844 | 0.858101503  | 0.000485147 |
| <i>Serbp1</i>   | ENSMUSG00000036371 | 0.654999561  | 0.00048576  |
| <i>Trabd2b</i>  | ENSMUSG00000070867 | -0.880499513 | 0.000487583 |
| <i>Ddt</i>      | ENSMUSG00000001666 | -1.008514023 | 0.000488372 |
| <i>Mydgf</i>    | ENSMUSG00000019579 | 0.780348467  | 0.000488466 |
| <i>Naa50</i>    | ENSMUSG00000022698 | 0.657240124  | 0.000491131 |
| <i>Btf3</i>     | ENSMUSG00000021660 | 0.614693979  | 0.000491234 |
| <i>Lifr</i>     | ENSMUSG00000054263 | -0.741763581 | 0.000494147 |
| <i>Rars</i>     | ENSMUSG00000018848 | 0.798713787  | 0.000495539 |
| <i>Pfkm</i>     | ENSMUSG00000033065 | -0.808105264 | 0.000499982 |
| <i>Mapk14</i>   | ENSMUSG00000053436 | -0.741130409 | 0.000501136 |
| <i>Phc2</i>     | ENSMUSG00000028796 | 0.701376982  | 0.000501136 |
| <i>Mgarp</i>    | ENSMUSG00000037161 | 2.659923844  | 0.000502031 |
| <i>Gab1</i>     | ENSMUSG00000031714 | -0.815944281 | 0.000509517 |
| <i>Dapk3</i>    | ENSMUSG00000034974 | 0.696495248  | 0.000509517 |
| <i>Cnmd</i>     | ENSMUSG00000022025 | -1.834222436 | 0.000509517 |

|                      |                    |              |             |
|----------------------|--------------------|--------------|-------------|
| <i>Gm15500</i>       | ENSMUSG00000086583 | 0.774503557  | 0.000509743 |
| <i>Abhd17b</i>       | ENSMUSG00000047368 | 0.836506266  | 0.000517605 |
| <i>Gm12960</i>       | ENSMUSG00000100514 | 1.107472809  | 0.000517767 |
| <i>Nme4</i>          | ENSMUSG00000024177 | -1.190744379 | 0.000518084 |
| <i>Hook1</i>         | ENSMUSG00000028572 | -1.123102752 | 0.000518911 |
| <i>Nras</i>          | ENSMUSG00000027852 | 0.788997234  | 0.000519727 |
| <i>Adra1a</i>        | ENSMUSG00000045875 | -1.590394032 | 0.000519727 |
| <i>Atp6v0d1</i>      | ENSMUSG00000013160 | 0.643207734  | 0.000519727 |
| <i>Cstb</i>          | ENSMUSG00000005054 | 0.956366427  | 0.000527598 |
| <i>Gm28437</i>       | ENSMUSG00000101111 | -1.058482884 | 0.000531501 |
| <i>Hfe2</i>          | ENSMUSG00000038403 | -0.848489327 | 0.000531909 |
| <i>Bche</i>          | ENSMUSG00000027792 | -1.092460206 | 0.000533651 |
| <i>2210408F21Rik</i> | ENSMUSG00000087380 | -1.085923673 | 0.000533651 |
| <i>Saysd1</i>        | ENSMUSG00000045107 | 0.878283907  | 0.000535208 |
| <i>Cd74</i>          | ENSMUSG00000024610 | 0.758394223  | 0.000542435 |
| <i>Ptgr1</i>         | ENSMUSG00000028378 | 1.058955926  | 0.000545236 |
| <i>Igfbp4</i>        | ENSMUSG00000017493 | 0.665805477  | 0.000547057 |
| <i>Crlf1</i>         | ENSMUSG00000007888 | 4.287227391  | 0.000550081 |
| <i>Sec31b</i>        | ENSMUSG00000051984 | -1.732824823 | 0.000551339 |
| <i>Galk1</i>         | ENSMUSG00000020766 | 0.797163637  | 0.000551995 |
| <i>St3gal5</i>       | ENSMUSG00000056091 | -0.875718232 | 0.000551995 |
| <i>Tead2</i>         | ENSMUSG00000030796 | 0.986076371  | 0.000554189 |
| <i>Stra6</i>         | ENSMUSG00000032327 | -2.365328192 | 0.000554189 |
| <i>Crebrf</i>        | ENSMUSG00000048249 | -0.79360851  | 0.000554778 |
| <i>Ugdh</i>          | ENSMUSG00000029201 | 0.893733773  | 0.000567666 |
| <i>Tuba1c</i>        | ENSMUSG00000043091 | 0.808802919  | 0.000569446 |
| <i>Ubqln4</i>        | ENSMUSG00000008604 | -0.684042087 | 0.000571979 |
| <i>Rab5c</i>         | ENSMUSG00000019173 | 0.656147352  | 0.000572297 |
| <i>Aurkb</i>         | ENSMUSG00000020897 | 2.442037608  | 0.000572603 |
| <i>Tnnt2</i>         | ENSMUSG00000026414 | -0.554251711 | 0.000572603 |
| <i>Tgfbr1</i>        | ENSMUSG00000007613 | 0.9967037    | 0.000574634 |
| <i>Rps10-ps2</i>     | ENSMUSG00000099764 | 0.672899736  | 0.00057611  |
| <i>Gnb4</i>          | ENSMUSG00000027669 | 0.89187788   | 0.00057657  |
| <i>Plk4</i>          | ENSMUSG00000025758 | 1.295173932  | 0.000581556 |
| <i>Atp5g2</i>        | ENSMUSG00000062683 | -0.663567022 | 0.00058293  |
| <i>Eml2</i>          | ENSMUSG00000040811 | -0.862513644 | 0.000584664 |
| <i>Adam12</i>        | ENSMUSG00000054555 | 3.210275572  | 0.000592973 |
| <i>Cdca8</i>         | ENSMUSG00000028873 | 2.02943011   | 0.000594957 |
| <i>Slc20a1</i>       | ENSMUSG00000027397 | 1.047144995  | 0.000595324 |
| <i>Hnrnpa1</i>       | ENSMUSG00000046434 | 0.650957093  | 0.000596047 |

|                      |                    |              |             |
|----------------------|--------------------|--------------|-------------|
| <i>Amotl2</i>        | ENSMUSG00000032531 | -0.76446308  | 0.000597296 |
| <i>Rasl10b</i>       | ENSMUSG00000020684 | -0.85035819  | 0.000599551 |
| <i>Gm14327</i>       | ENSMUSG00000074521 | -0.981971509 | 0.000599815 |
| <i>Osbpl8</i>        | ENSMUSG00000020189 | -0.71054343  | 0.000602915 |
| <i>Thrb</i>          | ENSMUSG00000021779 | -1.118562563 | 0.000603078 |
| <i>Mrto4</i>         | ENSMUSG00000028741 | 0.787800509  | 0.000604879 |
| <i>B230110C06Rik</i> | ENSMUSG00000097547 | -1.783285037 | 0.000605242 |
| <i>Gm5637</i>        | ENSMUSG00000046993 | 1.264639339  | 0.000605302 |
| <i>Wdte1</i>         | ENSMUSG00000037622 | -0.768496393 | 0.000606327 |
| <i>Dsp</i>           | ENSMUSG00000054889 | -0.921668445 | 0.000608888 |
| <i>Gm9385</i>        | ENSMUSG00000080848 | 1.003945883  | 0.000611734 |
| <i>Adcy9</i>         | ENSMUSG00000005580 | -1.823398199 | 0.000615003 |
| <i>Gm4739</i>        | ENSMUSG00000112808 | 2.0077201    | 0.000617053 |
| <i>Hhipl1</i>        | ENSMUSG00000021260 | 1.280281106  | 0.000617053 |
| <i>Ywhaq</i>         | ENSMUSG00000076432 | 0.720288413  | 0.000617053 |
| <i>Sspn</i>          | ENSMUSG00000030255 | -0.717960814 | 0.000617053 |
| <i>Decr1</i>         | ENSMUSG00000028223 | -0.655534191 | 0.000626734 |
| <i>Map3k5</i>        | ENSMUSG00000071369 | -0.955279279 | 0.000626734 |
| <i>Ssr2</i>          | ENSMUSG00000041355 | 0.702823559  | 0.000633837 |
| <i>Rps8</i>          | ENSMUSG00000047675 | 0.681583328  | 0.000633837 |
| <i>Slc25a26</i>      | ENSMUSG00000045100 | -1.053227268 | 0.000638076 |
| <i>Col6a1</i>        | ENSMUSG00000001119 | 0.684657499  | 0.000638076 |
| <i>Prmt1</i>         | ENSMUSG00000109324 | 0.628357106  | 0.000640448 |
| <i>Amigo2</i>        | ENSMUSG00000048218 | -0.975352562 | 0.000642948 |
| <i>Nsun4</i>         | ENSMUSG00000028706 | -0.789931314 | 0.000643747 |
| <i>Fads3</i>         | ENSMUSG00000024664 | 0.965751907  | 0.000644133 |
| <i>Ripor2</i>        | ENSMUSG00000036006 | -1.116947217 | 0.000644916 |
| <i>Entpd4b</i>       | ENSMUSG00000022066 | -4.518676003 | 0.000651654 |
| <i>Opal</i>          | ENSMUSG00000038084 | -0.702782249 | 0.000651654 |
| <i>Bcl2l11</i>       | ENSMUSG00000027381 | -1.09786291  | 0.000652474 |
| <i>Gm3646</i>        | ENSMUSG00000091937 | -1.276925653 | 0.000661146 |
| <i>Dip2b</i>         | ENSMUSG00000023026 | -0.888907973 | 0.000661146 |
| <i>Kctd12</i>        | ENSMUSG00000098557 | 0.912545293  | 0.000662341 |
| <i>Tinagl1</i>       | ENSMUSG00000028776 | 0.842275014  | 0.000663836 |
| <i>Cited2</i>        | ENSMUSG00000039910 | -0.7022771   | 0.000663871 |
| <i>Rcn1</i>          | ENSMUSG00000005973 | 0.69984554   | 0.000666352 |
| <i>Ccdc86</i>        | ENSMUSG00000024732 | 0.881598761  | 0.000666659 |
| <i>Sfn9</i>          | ENSMUSG00000069793 | 1.337780947  | 0.000667442 |
| <i>Hsd11b1</i>       | ENSMUSG00000016194 | -1.077729786 | 0.000669001 |
| <i>Gm32255</i>       | ENSMUSG00000112120 | 6.24548188   | 0.000669128 |

|                      |                     |              |             |
|----------------------|---------------------|--------------|-------------|
| <i>Slc45a3</i>       | ENSMUSG00000026435  | 1.035992003  | 0.000678814 |
| <i>Srpk3</i>         | ENSMUSG00000002007  | -0.837138437 | 0.000678814 |
| <i>Tmem151a</i>      | ENSMUSG000000061451 | -1.324000751 | 0.000682244 |
| <i>Bzw1</i>          | ENSMUSG000000051223 | 0.631141501  | 0.000685674 |
| <i>Acer2</i>         | ENSMUSG000000038007 | -0.760824926 | 0.000685681 |
| <i>Prodh</i>         | ENSMUSG00000003526  | -0.935661706 | 0.000686768 |
| <i>Nop14</i>         | ENSMUSG000000036693 | 0.875273117  | 0.000689044 |
| <i>Ipo4</i>          | ENSMUSG00000002319  | 0.802337523  | 0.000689289 |
| <i>Ncl</i>           | ENSMUSG000000026234 | 0.689104513  | 0.000689289 |
| <i>Tmem37</i>        | ENSMUSG000000050777 | 0.951734898  | 0.000689289 |
| <i>Tmf1</i>          | ENSMUSG000000030059 | 0.856873578  | 0.000692952 |
| <i>Chpf</i>          | ENSMUSG000000032997 | 0.782531234  | 0.000699294 |
| <i>4933431K23Rik</i> | ENSMUSG000000086451 | -1.382440266 | 0.000700632 |
| <i>Akip1</i>         | ENSMUSG000000031023 | 0.86800718   | 0.000705593 |
| <i>Zfp36</i>         | ENSMUSG000000044786 | 0.923126588  | 0.000709504 |
| <i>Lrrc59</i>        | ENSMUSG000000020869 | 0.895454605  | 0.000709896 |
| <i>Pes1</i>          | ENSMUSG000000020430 | 0.71932661   | 0.000712484 |
| <i>Rbm7</i>          | ENSMUSG000000042396 | 0.691504614  | 0.000714693 |
| <i>Rpl4</i>          | ENSMUSG000000032399 | 0.691815175  | 0.000722951 |
| <i>Rad51ap1</i>      | ENSMUSG000000030346 | 1.806750333  | 0.000725171 |
| <i>Fbxl5</i>         | ENSMUSG000000039753 | -0.64070929  | 0.00072573  |
| <i>Tspan4</i>        | ENSMUSG000000025511 | 0.656694903  | 0.000729642 |
| <i>Tpt1-ps3</i>      | ENSMUSG000000084319 | 0.645433901  | 0.000736126 |
| <i>Ptpn2</i>         | ENSMUSG000000024539 | 0.764000253  | 0.000737553 |
| <i>Mllt11</i>        | ENSMUSG000000053192 | 0.866314769  | 0.000737553 |
| <i>Wdr43</i>         | ENSMUSG000000041057 | 0.771960976  | 0.000739971 |
| <i>Pik3c2b</i>       | ENSMUSG000000026447 | -0.906710768 | 0.000741655 |
| <i>Cd28</i>          | ENSMUSG000000026012 | -2.047524239 | 0.000742016 |
| <i>Gzmk</i>          | ENSMUSG000000042385 | 6.197349732  | 0.000744554 |
| <i>Cdip1</i>         | ENSMUSG000000004071 | -0.717953569 | 0.00074467  |
| <i>Mvb12a</i>        | ENSMUSG000000031813 | 0.714173574  | 0.000746169 |
| <i>Ddo</i>           | ENSMUSG000000063428 | -0.824268739 | 0.000747054 |
| <i>Ywhah</i>         | ENSMUSG000000018965 | 0.653884827  | 0.000750028 |
| <i>Dcaf12l1</i>      | ENSMUSG000000045284 | -1.535196883 | 0.000755307 |
| <i>CN725425</i>      | ENSMUSG000000078932 | -3.314084355 | 0.000760701 |
| <i>Syne2</i>         | ENSMUSG000000063450 | -0.913820486 | 0.000761118 |
| <i>2310061I04Rik</i> | ENSMUSG000000050705 | -0.833540195 | 0.000761629 |
| <i>Dennd4b</i>       | ENSMUSG000000042404 | -0.889897397 | 0.000766287 |
| <i>Arhgef19</i>      | ENSMUSG000000028919 | -0.817480742 | 0.000772443 |
| <i>Ccl11</i>         | ENSMUSG000000020676 | -1.899440068 | 0.000777802 |



|                      |                    |              |             |
|----------------------|--------------------|--------------|-------------|
| <i>Rhob</i>          | ENSMUSG00000054364 | 0.646873373  | 0.000781387 |
| <i>Rpl17-ps10</i>    | ENSMUSG00000081895 | 0.787909324  | 0.000791775 |
| <i>Carns1</i>        | ENSMUSG00000075289 | -1.146964882 | 0.000791775 |
| <i>Cebpb</i>         | ENSMUSG00000056501 | 0.962714726  | 0.000791775 |
| <i>Ackr2</i>         | ENSMUSG00000044534 | 1.310402143  | 0.000792677 |
| <i>Gm44220</i>       | ENSMUSG00000107655 | -2.041903606 | 0.000792677 |
| <i>Igdcc4</i>        | ENSMUSG00000032816 | -1.179853997 | 0.000792677 |
| <i>Dpyd</i>          | ENSMUSG00000033308 | -1.133089618 | 0.000798035 |
| <i>Rpl26</i>         | ENSMUSG00000060938 | 0.678803248  | 0.000801061 |
| <i>Trp53bp1</i>      | ENSMUSG00000043909 | -0.994669252 | 0.000814536 |
| <i>Cdc25c</i>        | ENSMUSG00000044201 | 4.274952589  | 0.000815251 |
| <i>Rbl2</i>          | ENSMUSG00000031666 | -0.843519264 | 0.000817339 |
| <i>Epm2a</i>         | ENSMUSG00000055493 | -0.795889566 | 0.000819271 |
| <i>Kntc1</i>         | ENSMUSG00000029414 | 3.210968984  | 0.000826757 |
| <i>Efnb3</i>         | ENSMUSG00000003934 | -2.729343078 | 0.000836266 |
| <i>Gas2</i>          | ENSMUSG00000030498 | 1.135148087  | 0.000837839 |
| <i>Pdlim7</i>        | ENSMUSG00000021493 | 0.752715046  | 0.000838753 |
| <i>Cox6a2</i>        | ENSMUSG00000030785 | -0.75369274  | 0.000839324 |
| <i>Gm9843</i>        | ENSMUSG00000050299 | 0.847307762  | 0.000846977 |
| <i>Serpini1</i>      | ENSMUSG00000027834 | 1.387789281  | 0.000846977 |
| <i>Serpina3i</i>     | ENSMUSG00000079014 | 2.658266307  | 0.000847157 |
| <i>Gm12751</i>       | ENSMUSG00000062554 | 0.867792739  | 0.000848317 |
| <i>Gstm6</i>         | ENSMUSG00000068762 | -2.199371288 | 0.000849211 |
| <i>Omd</i>           | ENSMUSG00000048368 | 1.255417814  | 0.000850235 |
| <i>Calu</i>          | ENSMUSG00000029767 | 0.59837872   | 0.000850235 |
| <i>1700066B17Rik</i> | ENSMUSG00000101634 | -6.18576287  | 0.000853418 |
| <i>Gigyf1</i>        | ENSMUSG00000029714 | -1.040557676 | 0.000856633 |
| <i>Il10rb</i>        | ENSMUSG00000022969 | -0.682544978 | 0.000864283 |
| <i>Dpysl2</i>        | ENSMUSG00000022048 | 0.950085579  | 0.000865728 |
| <i>Tmem237</i>       | ENSMUSG00000038079 | 1.12886864   | 0.000867201 |
| <i>Adamts9</i>       | ENSMUSG00000030022 | 1.289158891  | 0.000870869 |
| <i>Cndp2</i>         | ENSMUSG00000024644 | 0.695174388  | 0.000890344 |
| <i>Bcor</i>          | ENSMUSG00000040363 | -0.798193765 | 0.000893807 |
| <i>Cx3cl1</i>        | ENSMUSG00000031778 | 1.238693125  | 0.000895289 |
| <i>Cdt1</i>          | ENSMUSG00000006585 | 1.555965797  | 0.000904322 |
| <i>Slc26a6</i>       | ENSMUSG00000023259 | -1.157151682 | 0.000907547 |
| <i>Ghr</i>           | ENSMUSG00000055737 | -0.642134932 | 0.000907902 |
| <i>Irgm2</i>         | ENSMUSG00000069874 | -0.919134265 | 0.000910118 |
| <i>Pym1</i>          | ENSMUSG00000064030 | 0.871385358  | 0.000914505 |
| <i>Abcc8</i>         | ENSMUSG00000040136 | -0.831736586 | 0.000915672 |

|                      |                    |              |             |
|----------------------|--------------------|--------------|-------------|
| <i>Ctsa</i>          | ENSMUSG00000017760 | 0.719032954  | 0.000915672 |
| <i>Fkbp14</i>        | ENSMUSG00000038074 | 0.854974151  | 0.000915672 |
| <i>Scarf2</i>        | ENSMUSG00000012017 | 1.016674215  | 0.000915672 |
| <i>Ncapg</i>         | ENSMUSG00000015880 | 2.349484229  | 0.00091647  |
| <i>Gpm6a</i>         | ENSMUSG00000031517 | -0.697805669 | 0.00091647  |
| <i>Fkbp4</i>         | ENSMUSG00000030357 | -0.93571143  | 0.000917202 |
| <i>0610025J13Rik</i> | ENSMUSG00000046683 | -2.449838125 | 0.00091744  |
| <i>Uchl1</i>         | ENSMUSG00000029223 | 1.096434049  | 0.000917912 |
| <i>Scn4b</i>         | ENSMUSG00000046480 | -2.846668085 | 0.000920106 |
| <i>Nudcd2</i>        | ENSMUSG00000020328 | 0.745934586  | 0.000920603 |
| <i>Mis18bp1</i>      | ENSMUSG00000047534 | 2.525461744  | 0.000925697 |
| <i>Bop1</i>          | ENSMUSG00000022557 | 0.723107927  | 0.000929255 |
| <i>Pxmp4</i>         | ENSMUSG00000000876 | -0.812223208 | 0.000936181 |
| <i>Gm48483</i>       | ENSMUSG00000111318 | -2.873006923 | 0.000940052 |
| <i>Rpl7a</i>         | ENSMUSG00000062647 | 0.699419828  | 0.000940396 |
| <i>Cd63-ps</i>       | ENSMUSG00000085939 | 0.949996381  | 0.00094379  |
| <i>Spdl1</i>         | ENSMUSG00000069910 | 2.966011046  | 0.00094379  |
| <i>Hba-a1</i>        | ENSMUSG00000069919 | 1.053543442  | 0.000944371 |
| <i>Gm28438</i>       | ENSMUSG00000101939 | -3.496378458 | 0.000946628 |
| <i>F2rl1</i>         | ENSMUSG00000021678 | 2.11390853   | 0.000946628 |
| <i>Tmem63b</i>       | ENSMUSG00000036026 | -0.903631976 | 0.000950841 |
| <i>Hdac9</i>         | ENSMUSG00000004698 | -1.060397137 | 0.000952622 |
| <i>Tnip1</i>         | ENSMUSG00000020400 | 0.923222763  | 0.000959597 |
| <i>Thumpd3</i>       | ENSMUSG00000030264 | 0.764370644  | 0.000960547 |
| <i>Rab13</i>         | ENSMUSG00000027935 | 1.080009546  | 0.000974303 |
| <i>Arl6ip1</i>       | ENSMUSG00000030654 | 0.692582835  | 0.000977649 |
| <i>Ntan1</i>         | ENSMUSG00000022681 | 0.675644197  | 0.000977664 |
| <i>Tmem25</i>        | ENSMUSG00000002032 | -1.160779661 | 0.000979384 |
| <i>Gm11899</i>       | ENSMUSG00000087399 | -2.027075533 | 0.00098408  |
| <i>Oxld1</i>         | ENSMUSG00000039670 | -0.815669839 | 0.000988572 |
| <i>Fbxw9</i>         | ENSMUSG00000008167 | 1.331607951  | 0.00099152  |
| <i>Smg6</i>          | ENSMUSG00000038290 | -0.898398837 | 0.000991787 |
| <i>Ppp1r3a</i>       | ENSMUSG00000042717 | -0.790368781 | 0.00100233  |
| <i>Nucb2</i>         | ENSMUSG00000030659 | 0.866442047  | 0.001016271 |
| <i>Comtd1</i>        | ENSMUSG00000021773 | 1.751589768  | 0.001017096 |
| <i>Npc2</i>          | ENSMUSG00000021242 | 0.768807087  | 0.001018708 |
| <i>BC023105</i>      | ENSMUSG00000063388 | -2.133477658 | 0.001027514 |
| <i>Phlpp1</i>        | ENSMUSG00000044340 | -0.980724431 | 0.00104124  |
| <i>Pde3a</i>         | ENSMUSG00000041741 | -0.794291636 | 0.001041286 |
| <i>Pde4dip</i>       | ENSMUSG00000038170 | -0.817716042 | 0.001043736 |

|                      |                    |              |             |
|----------------------|--------------------|--------------|-------------|
| <i>Thoc6</i>         | ENSMUSG00000041319 | 0.946241006  | 0.001048174 |
| <i>Gm9493</i>        | ENSMUSG00000044424 | 0.994306645  | 0.001056697 |
| <i>Oxr1</i>          | ENSMUSG00000022307 | -0.637235895 | 0.001058663 |
| <i>Ppil1</i>         | ENSMUSG00000024007 | -0.901676619 | 0.001069443 |
| <i>Neol</i>          | ENSMUSG00000032340 | -0.857796785 | 0.001073037 |
| <i>Slco5a1</i>       | ENSMUSG00000025938 | -1.479539222 | 0.001075603 |
| <i>Mgl2</i>          | ENSMUSG00000040950 | -1.203780273 | 0.00107625  |
| <i>Tlr7</i>          | ENSMUSG00000044583 | 1.029824526  | 0.001078569 |
| <i>Nudt12</i>        | ENSMUSG00000024228 | -1.074539742 | 0.001081735 |
| <i>Pik3r1</i>        | ENSMUSG00000041417 | -0.776336007 | 0.001084974 |
| <i>Clec18a</i>       | ENSMUSG00000033633 | -3.781448994 | 0.001087689 |
| <i>Ppp2r3a</i>       | ENSMUSG00000043154 | -0.785966955 | 0.001087689 |
| <i>Klhl23</i>        | ENSMUSG00000042155 | -0.969431836 | 0.00109029  |
| <i>Gm17251</i>       | ENSMUSG00000090952 | -1.887525106 | 0.001093923 |
| <i>2900076A07Rik</i> | ENSMUSG00000097277 | -1.221695828 | 0.001102112 |
| <i>Rpl8</i>          | ENSMUSG00000003970 | 0.567214572  | 0.001103792 |
| <i>Ikbip</i>         | ENSMUSG00000019975 | 0.743144072  | 0.001104728 |
| <i>Fam185a</i>       | ENSMUSG00000047221 | -0.912697428 | 0.001105476 |
| <i>Trip13</i>        | ENSMUSG00000021569 | 1.949471405  | 0.001105631 |
| <i>Pptc7</i>         | ENSMUSG00000038582 | -0.889156957 | 0.001105917 |
| <i>Sox12</i>         | ENSMUSG00000051817 | -0.901826147 | 0.001107394 |
| <i>Zfyve26</i>       | ENSMUSG00000066440 | -1.267781892 | 0.001107394 |
| <i>Gm13341</i>       | ENSMUSG00000083863 | -1.368820284 | 0.001107394 |
| <i>Enc1</i>          | ENSMUSG00000041773 | 1.05531106   | 0.001108073 |
| <i>Cnot6</i>         | ENSMUSG00000020362 | 0.708771192  | 0.001110728 |
| <i>Coll8a1</i>       | ENSMUSG00000001435 | 1.001179643  | 0.001111441 |
| <i>Cacnb3</i>        | ENSMUSG00000003352 | 1.323406446  | 0.001111441 |
| <i>Ripor1</i>        | ENSMUSG00000038604 | -0.682606882 | 0.001111441 |
| <i>Ppp1r12b</i>      | ENSMUSG00000073557 | -0.893323129 | 0.001120535 |
| <i>Firre</i>         | ENSMUSG00000085396 | -1.247263647 | 0.001128658 |
| <i>Camk2b</i>        | ENSMUSG00000057897 | -1.074842563 | 0.001138546 |
| <i>Gm5069</i>        | ENSMUSG00000055676 | -2.019397523 | 0.0011483   |
| <i>Dvl3</i>          | ENSMUSG00000003233 | -0.806182403 | 0.001158463 |
| <i>Sri</i>           | ENSMUSG00000003161 | 0.653209692  | 0.001159764 |
| <i>Atg101</i>        | ENSMUSG00000037204 | 0.871594836  | 0.001162084 |
| <i>Tpcn1</i>         | ENSMUSG00000032741 | -0.697369218 | 0.001167394 |
| <i>Creg1</i>         | ENSMUSG00000040713 | -0.629557251 | 0.001167394 |
| <i>Tmem201</i>       | ENSMUSG00000044700 | -0.738451626 | 0.001168322 |
| <i>Kcnq1</i>         | ENSMUSG00000009545 | -0.934815657 | 0.001180797 |
| <i>Oxct1</i>         | ENSMUSG00000022186 | -0.761204381 | 0.001187423 |

|                      |                    |              |             |
|----------------------|--------------------|--------------|-------------|
| <i>Osbp16</i>        | ENSMUSG00000042359 | -1.190333221 | 0.001189264 |
| <i>4833412C05Rik</i> | ENSMUSG00000097697 | 3.149782282  | 0.001200201 |
| <i>A4galt</i>        | ENSMUSG00000047878 | 0.870065617  | 0.001200201 |
| <i>Traip</i>         | ENSMUSG00000032586 | 2.069819255  | 0.001202952 |
| <i>Atp8a1</i>        | ENSMUSG00000037685 | -0.85898948  | 0.001205405 |
| <i>Nkd2</i>          | ENSMUSG00000021567 | 1.581666942  | 0.001213253 |
| <i>Siah2</i>         | ENSMUSG00000036432 | 0.901389441  | 0.00121691  |
| <i>Psmc11</i>        | ENSMUSG00000017428 | 0.667212163  | 0.001221548 |
| <i>Vkorc1</i>        | ENSMUSG00000096145 | 1.400708593  | 0.001222673 |
| <i>Nek6</i>          | ENSMUSG00000026749 | 1.121597695  | 0.001223391 |
| <i>Jam2</i>          | ENSMUSG00000053062 | -0.638110974 | 0.001223391 |
| <i>Ddx21</i>         | ENSMUSG00000020075 | 0.734724922  | 0.001224446 |
| <i>Smg5</i>          | ENSMUSG00000001415 | -0.649999022 | 0.001227439 |
| <i>Vldlr</i>         | ENSMUSG00000024924 | -0.870126327 | 0.001228658 |
| <i>Mapk1ip1</i>      | ENSMUSG00000041775 | -0.947853745 | 0.001238286 |
| <i>Hecw2</i>         | ENSMUSG00000042807 | 1.073487906  | 0.001239528 |
| <i>Ucp2</i>          | ENSMUSG00000033685 | 0.637508237  | 0.001242462 |
| <i>Gm33016</i>       | ENSMUSG00000113278 | -5.56993038  | 0.001242462 |
| <i>Mcf2l</i>         | ENSMUSG00000031442 | 0.910389852  | 0.00124709  |
| <i>Dapp1</i>         | ENSMUSG00000028159 | -0.998877536 | 0.001254827 |
| <i>Eda2r</i>         | ENSMUSG00000034457 | 1.086493658  | 0.001257694 |
| <i>Klrb1b</i>        | ENSMUSG00000079298 | 3.848183139  | 0.001260408 |
| <i>Myh6</i>          | ENSMUSG00000040752 | -0.991428815 | 0.001260408 |
| <i>Slamf7</i>        | ENSMUSG00000038179 | 2.061142916  | 0.00126259  |
| <i>Lpxn</i>          | ENSMUSG00000024696 | 1.29341031   | 0.00126785  |
| <i>Rab32</i>         | ENSMUSG00000019832 | 1.134954603  | 0.001267976 |
| <i>Gm9761</i>        | ENSMUSG00000034437 | 1.201179665  | 0.001268445 |
| <i>Nuak1</i>         | ENSMUSG00000020032 | 0.705586296  | 0.001273756 |
| <i>Dhrs4</i>         | ENSMUSG00000022210 | -0.710035325 | 0.001282516 |
| <i>Rai2</i>          | ENSMUSG00000043518 | -0.72169745  | 0.001284474 |
| <i>Fgf13</i>         | ENSMUSG00000031137 | -0.872284874 | 0.001306632 |
| <i>Pdpm</i>          | ENSMUSG00000028583 | 0.8958609    | 0.001319459 |
| <i>Rtn4ip1</i>       | ENSMUSG00000019864 | -0.932475252 | 0.001329999 |
| <i>Siae</i>          | ENSMUSG00000001942 | -0.946185844 | 0.001333879 |
| <i>Nudt18</i>        | ENSMUSG00000045211 | 0.753825634  | 0.001334036 |
| <i>Ifi204</i>        | ENSMUSG00000073489 | 0.753299552  | 0.001336706 |
| <i>Pald1</i>         | ENSMUSG00000020092 | 0.788980758  | 0.001339844 |
| <i>Gm14681</i>       | ENSMUSG00000081603 | 1.125973591  | 0.001343563 |
| <i>Cd3g</i>          | ENSMUSG00000002033 | 2.430685011  | 0.001347423 |
| <i>Atp5s</i>         | ENSMUSG00000054894 | -0.776781135 | 0.001348366 |

|                      |                    |              |             |
|----------------------|--------------------|--------------|-------------|
| <i>Foxo6</i>         | ENSMUSG00000052135 | -1.718622905 | 0.001349709 |
| <i>Cenpe</i>         | ENSMUSG00000045328 | 2.278966186  | 0.001351414 |
| <i>Gm3379</i>        | ENSMUSG00000113625 | 1.677066167  | 0.001352159 |
| <i>Epha7</i>         | ENSMUSG00000028289 | -1.220177843 | 0.001358274 |
| <i>Eid1</i>          | ENSMUSG00000091337 | 0.700225615  | 0.001359256 |
| <i>Cct8</i>          | ENSMUSG00000025613 | 0.589547156  | 0.001367727 |
| <i>Atp6v1a</i>       | ENSMUSG00000052459 | 0.640752663  | 0.001367727 |
| <i>Synpo</i>         | ENSMUSG00000043079 | 0.719446982  | 0.001378454 |
| <i>Gstt1</i>         | ENSMUSG00000001663 | -0.977554379 | 0.001384638 |
| <i>Mdh2</i>          | ENSMUSG00000019179 | -0.633776273 | 0.001384638 |
| <i>Znr1as</i>        | ENSMUSG00000036214 | -0.832644772 | 0.001387155 |
| <i>Utp3</i>          | ENSMUSG00000070697 | 0.651352862  | 0.001394224 |
| <i>Abce1</i>         | ENSMUSG00000058355 | 0.693966902  | 0.001396718 |
| <i>Wnk1</i>          | ENSMUSG00000045962 | -0.755941286 | 0.001401193 |
| <i>Ctps</i>          | ENSMUSG00000028633 | 0.639340774  | 0.00141368  |
| <i>Tax1bp3</i>       | ENSMUSG00000040158 | 0.718751774  | 0.001430447 |
| <i>Ndufab1</i>       | ENSMUSG00000030869 | -0.68681487  | 0.001430447 |
| <i>Cdk15</i>         | ENSMUSG00000031292 | -1.685740279 | 0.001430447 |
| <i>Nsmaf</i>         | ENSMUSG00000028245 | -0.635825855 | 0.001437597 |
| <i>Hcls1</i>         | ENSMUSG00000022831 | 0.801395708  | 0.001437597 |
| <i>Akap7</i>         | ENSMUSG00000039166 | -0.763734043 | 0.001444405 |
| <i>Cenpw</i>         | ENSMUSG00000075266 | 1.816404216  | 0.00144837  |
| <i>Gm17383</i>       | ENSMUSG00000058625 | 2.172061557  | 0.001449941 |
| <i>Tmem183a</i>      | ENSMUSG00000042305 | 0.69981926   | 0.00145113  |
| <i>Gm11847</i>       | ENSMUSG00000060989 | 1.125416906  | 0.001456687 |
| <i>Uap111</i>        | ENSMUSG00000026956 | 0.886868491  | 0.001460122 |
| <i>Ankrd2</i>        | ENSMUSG00000025172 | 2.734152511  | 0.00146108  |
| <i>3300005D01Rik</i> | ENSMUSG00000096965 | 5.921812483  | 0.001465075 |
| <i>Nppa</i>          | ENSMUSG00000041616 | 2.685827571  | 0.001465763 |
| <i>Sh3bgrl3</i>      | ENSMUSG00000028843 | 0.874064595  | 0.001475111 |
| <i>Tfb2m</i>         | ENSMUSG00000026492 | -0.652855557 | 0.001475751 |
| <i>Nudt11</i>        | ENSMUSG00000073295 | -1.486163512 | 0.001478892 |
| <i>Ube2b</i>         | ENSMUSG00000020390 | -0.663363267 | 0.001479157 |
| <i>AC165271.1</i>    | ENSMUSG00000116641 | 2.103961047  | 0.00148352  |
| <i>Havcr2</i>        | ENSMUSG00000020399 | 1.97438735   | 0.001491174 |
| <i>Igf2bp2</i>       | ENSMUSG00000033581 | 1.255926133  | 0.001492354 |
| <i>Myoz1</i>         | ENSMUSG00000068697 | 2.795929269  | 0.001492354 |
| <i>Tsta3</i>         | ENSMUSG00000022570 | 0.72026626   | 0.0014965   |
| <i>Ndufv3</i>        | ENSMUSG00000024038 | -0.782511846 | 0.0014965   |
| <i>Klhl8</i>         | ENSMUSG00000029312 | -0.954041413 | 0.001506329 |

|                      |                    |              |             |
|----------------------|--------------------|--------------|-------------|
| <i>Gba</i>           | ENSMUSG00000028048 | 0.794290443  | 0.001516283 |
| <i>Sun3</i>          | ENSMUSG00000040985 | -2.864814886 | 0.001519311 |
| <i>Foxm1</i>         | ENSMUSG00000001517 | 2.150986709  | 0.001529235 |
| <i>Ifngr1</i>        | ENSMUSG00000020009 | 0.734488752  | 0.001530861 |
| <i>Tcta</i>          | ENSMUSG00000039461 | -0.820671687 | 0.001535604 |
| <i>Atp6v0e2</i>      | ENSMUSG00000039347 | -0.9733121   | 0.001539027 |
| <i>B4galt2</i>       | ENSMUSG00000028541 | 0.994917979  | 0.001539133 |
| <i>Adamts16</i>      | ENSMUSG00000049538 | 6.055875072  | 0.001539774 |
| <i>Slc35e4</i>       | ENSMUSG00000048807 | 0.901806985  | 0.001540315 |
| <i>Tex30</i>         | ENSMUSG00000026049 | 1.167808354  | 0.00154039  |
| <i>Acat1</i>         | ENSMUSG00000032047 | -0.677326114 | 0.0015443   |
| <i>Zfp365</i>        | ENSMUSG00000037855 | 1.584955017  | 0.001551872 |
| <i>Trmt6</i>         | ENSMUSG00000037376 | 0.935336865  | 0.001552133 |
| <i>Gprasp1</i>       | ENSMUSG00000043384 | -0.858623319 | 0.001554754 |
| <i>Pdpr</i>          | ENSMUSG00000033624 | -1.274185936 | 0.001561897 |
| <i>Pdpx</i>          | ENSMUSG00000116165 | 1.849264484  | 0.001561897 |
| <i>Gm31520</i>       | ENSMUSG00000107653 | -1.891341564 | 0.001561897 |
| <i>Sipa112</i>       | ENSMUSG00000001995 | -0.948627657 | 0.001562991 |
| <i>Nusap1</i>        | ENSMUSG00000027306 | 1.614347779  | 0.001582334 |
| <i>Kn11</i>          | ENSMUSG00000027326 | 3.124722863  | 0.001585599 |
| <i>Pak1</i>          | ENSMUSG00000030774 | 1.204320313  | 0.001590206 |
| <i>Uba2</i>          | ENSMUSG00000052997 | 0.636796923  | 0.001590206 |
| <i>Ppm11</i>         | ENSMUSG00000027784 | -1.077649173 | 0.001599707 |
| <i>Gm11967</i>       | ENSMUSG00000084819 | 1.535157668  | 0.001618657 |
| <i>Tlcd1</i>         | ENSMUSG00000019437 | -1.169641054 | 0.001619959 |
| <i>Arfgef1</i>       | ENSMUSG00000067851 | -0.695291564 | 0.001625654 |
| <i>Mgp</i>           | ENSMUSG00000030218 | 1.034728632  | 0.001628324 |
| <i>Acp5</i>          | ENSMUSG00000001348 | 1.810121608  | 0.00162948  |
| <i>Plekhn1</i>       | ENSMUSG00000078485 | -1.018945077 | 0.001642432 |
| <i>9330158H04Rik</i> | ENSMUSG00000073154 | -0.759436512 | 0.001656498 |
| <i>Mastl</i>         | ENSMUSG00000026779 | 2.032004525  | 0.001663524 |
| <i>Atp5j</i>         | ENSMUSG00000022890 | -0.719287295 | 0.001666413 |
| <i>Fmr1</i>          | ENSMUSG00000000838 | 0.855439836  | 0.001667939 |
| <i>Mcm10</i>         | ENSMUSG00000026669 | 3.420356964  | 0.001671845 |
| <i>Parp1</i>         | ENSMUSG00000026496 | -0.68004862  | 0.001671845 |
| <i>Scrn3</i>         | ENSMUSG00000008226 | -0.722463338 | 0.00167482  |
| <i>Ubp2</i>          | ENSMUSG00000028433 | -0.783677311 | 0.00167482  |
| <i>Prcp</i>          | ENSMUSG00000061119 | 0.74532441   | 0.001680598 |
| <i>Pafah1b2</i>      | ENSMUSG00000003131 | 0.604584402  | 0.001689551 |
| <i>Cacnb2</i>        | ENSMUSG00000057914 | -0.83996649  | 0.001694212 |

|                      |                    |              |             |
|----------------------|--------------------|--------------|-------------|
| <i>Gaa</i>           | ENSMUSG00000025579 | -0.6405244   | 0.001697347 |
| <i>Adssl1</i>        | ENSMUSG00000011148 | 0.573238703  | 0.001700592 |
| <i>Spata33</i>       | ENSMUSG00000048478 | -0.989362907 | 0.001701607 |
| <i>Gpr171</i>        | ENSMUSG00000050075 | 3.307363818  | 0.001701607 |
| <i>Svip</i>          | ENSMUSG00000074093 | -0.860635281 | 0.001701607 |
| <i>Abi3bp</i>        | ENSMUSG00000035258 | 0.965253188  | 0.001708349 |
| <i>Adamts14</i>      | ENSMUSG00000015850 | -0.79839088  | 0.001726183 |
| <i>Tsc22d3</i>       | ENSMUSG00000031431 | 0.900012206  | 0.001726183 |
| <i>9030612E09Rik</i> | ENSMUSG00000045008 | -1.731017191 | 0.001732862 |
| <i>Sardh</i>         | ENSMUSG00000009614 | 0.989183207  | 0.001733325 |
| <i>Pafah1b3</i>      | ENSMUSG00000005447 | 1.279080237  | 0.0017348   |
| <i>Tmem50b</i>       | ENSMUSG00000022964 | -0.659934191 | 0.001747797 |
| <i>Atp6v0e</i>       | ENSMUSG00000015575 | 0.636771906  | 0.001751759 |
| <i>Hrct1</i>         | ENSMUSG00000071001 | 1.027299365  | 0.001756657 |
| <i>Sapcd2</i>        | ENSMUSG00000026955 | 3.214331414  | 0.001760439 |
| <i>Polg</i>          | ENSMUSG00000039176 | -0.757307612 | 0.001766254 |
| <i>Nod1</i>          | ENSMUSG00000038058 | -0.823018246 | 0.001771919 |
| <i>Vars2</i>         | ENSMUSG00000038838 | -0.923331262 | 0.001773842 |
| <i>Pdhal</i>         | ENSMUSG00000031299 | -0.667204344 | 0.001776268 |
| <i>Sp3os</i>         | ENSMUSG00000063714 | -1.104813807 | 0.00180353  |
| <i>Papss1</i>        | ENSMUSG00000028032 | 0.776782363  | 0.001804969 |
| <i>Gnpat</i>         | ENSMUSG00000031985 | -0.691658954 | 0.001809063 |
| <i>Mettl1b</i>       | ENSMUSG00000040113 | -2.886940064 | 0.00181091  |
| <i>Sybu</i>          | ENSMUSG00000022340 | -1.600039084 | 0.00181091  |
| <i>Arhgef17</i>      | ENSMUSG00000032875 | -0.851675489 | 0.001813841 |
| <i>Cntrl</i>         | ENSMUSG00000057110 | -1.08146091  | 0.001815145 |
| <i>Olfml3</i>        | ENSMUSG00000027848 | 0.657459845  | 0.001815145 |
| <i>Tmem8b</i>        | ENSMUSG00000078716 | -0.912493406 | 0.001818525 |
| <i>Tlr13</i>         | ENSMUSG00000033777 | 1.14773615   | 0.001827605 |
| <i>Irx5</i>          | ENSMUSG00000031737 | -0.950672407 | 0.001842892 |
| <i>Gm8991</i>        | ENSMUSG00000059179 | 1.233374827  | 0.001847634 |
| <i>Kif2c</i>         | ENSMUSG00000028678 | 2.393451981  | 0.001852469 |
| <i>Gm14150</i>       | ENSMUSG00000082809 | 1.812394273  | 0.001852469 |
| <i>Chaf1b</i>        | ENSMUSG00000022945 | 1.771321327  | 0.001852472 |
| <i>Slc25a5</i>       | ENSMUSG00000016319 | 0.56497081   | 0.001853005 |
| <i>Zwilch</i>        | ENSMUSG00000032400 | 2.065849002  | 0.001856036 |
| <i>Cyp2s1</i>        | ENSMUSG00000040703 | -1.289927757 | 0.001861189 |
| <i>Ly86</i>          | ENSMUSG00000021423 | 1.055793438  | 0.001863752 |
| <i>Trmt5</i>         | ENSMUSG00000034442 | -0.825044489 | 0.001863752 |
| <i>Zfp629</i>        | ENSMUSG00000045639 | -0.911068747 | 0.001869049 |

|                  |                    |              |             |
|------------------|--------------------|--------------|-------------|
| <i>Zyx</i>       | ENSMUSG00000029860 | 0.718979003  | 0.001870915 |
| <i>Tradd</i>     | ENSMUSG00000031887 | 0.997567222  | 0.001883133 |
| <i>Eci1</i>      | ENSMUSG00000024132 | -0.722105699 | 0.001883377 |
| <i>Rrad</i>      | ENSMUSG00000031880 | -0.637706297 | 0.001889633 |
| <i>Smc2</i>      | ENSMUSG00000028312 | 1.282853187  | 0.001894302 |
| <i>Slc25a3</i>   | ENSMUSG00000061904 | -0.602015936 | 0.001915712 |
| <i>Gnl1</i>      | ENSMUSG00000024429 | 0.62225594   | 0.001923785 |
| <i>Emp3</i>      | ENSMUSG00000040212 | 0.830059461  | 0.00192562  |
| <i>Gpt2</i>      | ENSMUSG00000031700 | -0.723568967 | 0.001929695 |
| <i>Thap6</i>     | ENSMUSG00000102644 | -1.327896738 | 0.001945911 |
| <i>Pgam1-ps2</i> | ENSMUSG00000082016 | 2.183906958  | 0.001951456 |
| <i>Sema6b</i>    | ENSMUSG00000001227 | 0.861811489  | 0.00196925  |
| <i>Zkscan8</i>   | ENSMUSG00000063894 | -1.116799601 | 0.001983357 |
| <i>Rps12</i>     | ENSMUSG00000061983 | 1.026744527  | 0.001985338 |
| <i>Sirt3</i>     | ENSMUSG00000025486 | -0.647224748 | 0.001985338 |
| <i>Xdh</i>       | ENSMUSG00000024066 | -0.651778291 | 0.001985839 |
| <i>Shb</i>       | ENSMUSG00000044813 | 0.729168312  | 0.001990018 |
| <i>Rragd</i>     | ENSMUSG00000028278 | -0.747731276 | 0.001993467 |
| <i>Acs11</i>     | ENSMUSG00000018796 | -0.836126132 | 0.001998062 |
| <i>Rps7</i>      | ENSMUSG00000061477 | 0.652799475  | 0.002005614 |
| <i>Rpl34</i>     | ENSMUSG00000062006 | 0.727772661  | 0.002005614 |
| <i>Gpam</i>      | ENSMUSG00000024978 | -0.929170103 | 0.002017704 |
| <i>Ap1s2</i>     | ENSMUSG00000031367 | 0.634048276  | 0.002020357 |
| <i>Eprn</i>      | ENSMUSG00000113346 | -1.794791492 | 0.002025207 |
| <i>Spata6</i>    | ENSMUSG00000034401 | 0.879653147  | 0.002026227 |
| <i>Cox7a1</i>    | ENSMUSG00000074218 | -0.939287595 | 0.002029939 |
| <i>Gm9844</i>    | ENSMUSG00000091955 | 1.538156339  | 0.002049078 |
| <i>Cd34</i>      | ENSMUSG00000016494 | 0.587703498  | 0.002049303 |
| <i>Gm15501</i>   | ENSMUSG00000087412 | 0.726881626  | 0.002051413 |
| <i>Prim1</i>     | ENSMUSG00000025395 | 1.348668381  | 0.002064841 |
| <i>Scmh1</i>     | ENSMUSG00000000085 | -0.697036385 | 0.002079048 |
| <i>Ap1s1</i>     | ENSMUSG00000004849 | 0.615824164  | 0.002079369 |
| <i>Dynl12</i>    | ENSMUSG00000020483 | -0.686987124 | 0.002079369 |
| <i>Ccdc9b</i>    | ENSMUSG00000045838 | -0.96770377  | 0.002086304 |
| <i>Gm17546</i>   | ENSMUSG00000078648 | -1.990180372 | 0.002086877 |
| <i>Erh</i>       | ENSMUSG00000021131 | 0.708913817  | 0.002097252 |
| <i>Trmt2b</i>    | ENSMUSG00000067369 | -0.653642941 | 0.002115732 |
| <i>Gm47283</i>   | ENSMUSG00000096768 | -6.076730265 | 0.002116652 |
| <i>Zer1</i>      | ENSMUSG00000039686 | -0.836470188 | 0.002116652 |
| <i>Lhfpl1</i>    | ENSMUSG00000041700 | 5.861889102  | 0.002116652 |



|                 |                    |              |             |
|-----------------|--------------------|--------------|-------------|
| <i>Lrp2</i>     | ENSMUSG00000027070 | -2.303695027 | 0.002119482 |
| <i>Cltb</i>     | ENSMUSG00000047547 | 0.598308564  | 0.002122778 |
| <i>Slc25a20</i> | ENSMUSG00000032602 | -0.674705771 | 0.002123753 |
| <i>Fgl2</i>     | ENSMUSG00000039899 | 0.577212297  | 0.002124224 |
| <i>Dut</i>      | ENSMUSG00000027203 | -0.718758779 | 0.002137674 |
| <i>Tgif1</i>    | ENSMUSG00000047407 | 1.195069755  | 0.002137837 |
| <i>Rapgef4</i>  | ENSMUSG00000049044 | -1.008768675 | 0.00215378  |
| <i>Nipal3</i>   | ENSMUSG00000028803 | -0.831006592 | 0.002183161 |
| <i>Tmem196</i>  | ENSMUSG00000048004 | -2.372735657 | 0.002183161 |
| <i>Kif1a</i>    | ENSMUSG00000014602 | 2.541711178  | 0.002183161 |
| <i>Sbk3</i>     | ENSMUSG00000085272 | -1.625271441 | 0.002185307 |
| <i>Gm2000</i>   | ENSMUSG00000078193 | 0.79257874   | 0.002200016 |
| <i>Abca6</i>    | ENSMUSG00000044749 | -0.967211846 | 0.002200016 |
| <i>Lgi1</i>     | ENSMUSG00000067242 | -2.516412026 | 0.002200016 |
| <i>Ephx2</i>    | ENSMUSG00000022040 | -0.653913501 | 0.002210673 |
| <i>Taf6</i>     | ENSMUSG00000036980 | -0.895535212 | 0.002218709 |
| <i>Nampt</i>    | ENSMUSG00000020572 | -0.680564408 | 0.002221752 |
| <i>Rps20</i>    | ENSMUSG00000028234 | 0.659399487  | 0.002222301 |
| <i>Sp4</i>      | ENSMUSG00000025323 | -1.089970863 | 0.002222301 |
| <i>Cyp26b1</i>  | ENSMUSG00000063415 | -1.669909769 | 0.002222301 |
| <i>Mfge8</i>    | ENSMUSG00000030605 | 0.576512973  | 0.002233703 |
| <i>Gmfb</i>     | ENSMUSG00000062014 | 0.634404322  | 0.002242998 |
| <i>Lrba</i>     | ENSMUSG00000028080 | -0.880303571 | 0.002249425 |
| <i>Cbfa2t3</i>  | ENSMUSG00000006362 | -0.913145609 | 0.002250058 |
| <i>Saal1</i>    | ENSMUSG00000006763 | 0.902262184  | 0.002262025 |
| <i>Farp2</i>    | ENSMUSG00000034066 | -1.152976549 | 0.002266619 |
| <i>Cd36</i>     | ENSMUSG00000002944 | -0.671464692 | 0.002287718 |
| <i>Myl2</i>     | ENSMUSG00000013936 | -0.525073877 | 0.002287718 |
| <i>Hspa11</i>   | ENSMUSG00000007033 | 1.700556509  | 0.002290605 |
| <i>Ptgs2</i>    | ENSMUSG00000032487 | 1.116537278  | 0.002298677 |
| <i>Mccc1os</i>  | ENSMUSG00000086392 | -2.140296998 | 0.00230257  |
| <i>Uba5</i>     | ENSMUSG00000032557 | 0.692458709  | 0.002305853 |
| <i>Nlrc3</i>    | ENSMUSG00000049871 | 1.925572097  | 0.00232624  |
| <i>Ntn1</i>     | ENSMUSG00000020902 | -0.735611668 | 0.00233256  |
| <i>Pgd</i>      | ENSMUSG00000028961 | 0.672818199  | 0.002332651 |
| <i>Cand2</i>    | ENSMUSG00000030319 | -0.786603841 | 0.002336308 |
| <i>Slc12a4</i>  | ENSMUSG00000017765 | 0.813313825  | 0.002337852 |
| <i>Dand5</i>    | ENSMUSG00000053226 | -0.842267129 | 0.002344365 |
| <i>Figl1</i>    | ENSMUSG00000035455 | 1.844538974  | 0.00235806  |
| <i>Sh3gl1</i>   | ENSMUSG00000003200 | 0.769437879  | 0.002358435 |

|                 |                    |              |             |
|-----------------|--------------------|--------------|-------------|
| <i>Myo1c</i>    | ENSMUSG00000017774 | 0.69878051   | 0.002367987 |
| <i>Tmem200b</i> | ENSMUSG00000070720 | 1.229679436  | 0.002367987 |
| <i>Cygb</i>     | ENSMUSG00000020810 | 0.641698319  | 0.002374286 |
| <i>Tmem70</i>   | ENSMUSG00000025940 | -0.677459018 | 0.002388054 |
| <i>Mkks</i>     | ENSMUSG00000027274 | -0.942979742 | 0.002389891 |
| <i>C8g</i>      | ENSMUSG00000015083 | -1.80860401  | 0.002392186 |
| <i>Mrps10</i>   | ENSMUSG00000034729 | 0.596376422  | 0.002398463 |
| <i>Satb1</i>    | ENSMUSG00000023927 | -0.898144977 | 0.002398747 |
| <i>Npepl1</i>   | ENSMUSG00000039263 | -0.564678427 | 0.0024024   |
| <i>Nuak2</i>    | ENSMUSG00000009772 | 1.257464784  | 0.002403572 |
| <i>Pde1b</i>    | ENSMUSG00000022489 | 1.890352048  | 0.002405587 |
| <i>Cideb</i>    | ENSMUSG00000022219 | -2.893598251 | 0.002408282 |
| <i>Lgals9</i>   | ENSMUSG00000001123 | 0.739898546  | 0.002408282 |
| <i>Mbd6</i>     | ENSMUSG00000025409 | -0.990137717 | 0.002408282 |
| <i>Id1</i>      | ENSMUSG00000042745 | 0.802327504  | 0.002412418 |
| <i>Uhrf1</i>    | ENSMUSG00000001228 | 1.374034061  | 0.002414734 |
| <i>Jpt2</i>     | ENSMUSG00000024165 | 0.902411988  | 0.002418844 |
| <i>Foxred1</i>  | ENSMUSG00000039048 | -0.648683981 | 0.002421987 |
| <i>Rfc5</i>     | ENSMUSG00000029363 | 0.90224709   | 0.002424242 |
| <i>Nbr1</i>     | ENSMUSG00000017119 | -0.594668409 | 0.002433278 |
| <i>Rnf19a</i>   | ENSMUSG00000022280 | 0.77601696   | 0.002442996 |
| <i>Slc25a28</i> | ENSMUSG00000040414 | -0.705826928 | 0.002445754 |
| <i>Vps29</i>    | ENSMUSG00000029462 | 0.661036779  | 0.002449701 |
| <i>Chmp3</i>    | ENSMUSG00000053119 | 0.584646999  | 0.002456269 |
| <i>Cercam</i>   | ENSMUSG00000039787 | 1.150387066  | 0.002462725 |
| <i>Tnrc6b</i>   | ENSMUSG00000047888 | -1.017389341 | 0.002462725 |
| <i>Ndufb4c</i>  | ENSMUSG00000083380 | -1.061760721 | 0.002476895 |
| <i>7-Sep</i>    | ENSMUSG00000001833 | 0.518673879  | 0.002480469 |
| <i>Zfyve21</i>  | ENSMUSG00000021286 | -0.644087808 | 0.002488562 |
| <i>Bhlhe41</i>  | ENSMUSG00000030256 | 0.657559755  | 0.002492766 |
| <i>Dennd4c</i>  | ENSMUSG00000038024 | -0.740837038 | 0.002493285 |
| <i>Gja4</i>     | ENSMUSG00000050234 | 0.961294147  | 0.002494558 |
| <i>Pnpla2</i>   | ENSMUSG00000025509 | -0.543952085 | 0.002501241 |
| <i>Meis2</i>    | ENSMUSG00000027210 | -0.831665411 | 0.002505688 |
| <i>Ctu2</i>     | ENSMUSG00000049482 | 0.868083514  | 0.002505688 |
| <i>Mgrn1</i>    | ENSMUSG00000022517 | -0.716366804 | 0.002519504 |
| <i>Kif28</i>    | ENSMUSG00000087236 | -2.661932769 | 0.002536564 |
| <i>Gtf2f2</i>   | ENSMUSG00000067995 | 0.699662951  | 0.002538433 |
| <i>Nap111</i>   | ENSMUSG00000058799 | 0.580426366  | 0.002560147 |
| <i>Angptl3</i>  | ENSMUSG00000028553 | -1.817242854 | 0.002561912 |

|                 |                    |              |             |
|-----------------|--------------------|--------------|-------------|
| <i>Hint2</i>    | ENSMUSG00000028470 | -0.614609458 | 0.002570915 |
| <i>Macrodl</i>  | ENSMUSG00000036278 | -0.618559554 | 0.002571579 |
| <i>Pxdc1</i>    | ENSMUSG00000021411 | 0.877414167  | 0.002578338 |
| <i>Cd300a</i>   | ENSMUSG00000034652 | 1.38018485   | 0.002586112 |
| <i>Dsel</i>     | ENSMUSG00000038702 | 0.983090523  | 0.002586112 |
| <i>Acs16</i>    | ENSMUSG00000020333 | -1.030658687 | 0.002597315 |
| <i>Gpsm2</i>    | ENSMUSG00000027883 | 1.339995394  | 0.002607488 |
| <i>Gimap4</i>   | ENSMUSG00000054435 | 0.862515533  | 0.002612785 |
| <i>N4bp2l2</i>  | ENSMUSG00000029655 | 0.671136586  | 0.002614243 |
| <i>Cd44</i>     | ENSMUSG00000005087 | 0.942239387  | 0.002614243 |
| <i>B4galt4</i>  | ENSMUSG00000022793 | 0.878448874  | 0.002614407 |
| <i>Bhlhb9</i>   | ENSMUSG00000072964 | -0.789856577 | 0.002617111 |
| <i>Mreg</i>     | ENSMUSG00000039395 | -0.879418851 | 0.002626441 |
| <i>Mkrn2os</i>  | ENSMUSG00000068011 | -2.51711784  | 0.002626441 |
| <i>Ccl2</i>     | ENSMUSG00000035385 | 1.027428989  | 0.002626441 |
| <i>St3gal3</i>  | ENSMUSG00000028538 | -0.723494547 | 0.002626754 |
| <i>AU040320</i> | ENSMUSG00000028830 | -0.704948246 | 0.002647908 |
| <i>Atp5b</i>    | ENSMUSG00000025393 | -0.525832091 | 0.002647908 |
| <i>Kyat1</i>    | ENSMUSG00000039648 | -0.78581802  | 0.00266313  |
| <i>Dcaf8</i>    | ENSMUSG00000026554 | -0.636859459 | 0.002665026 |
| <i>Tcf4</i>     | ENSMUSG00000053477 | 0.647135673  | 0.002665758 |
| <i>Slc25a25</i> | ENSMUSG00000026819 | 1.048423005  | 0.002670104 |
| <i>Gpr22</i>    | ENSMUSG00000044067 | -1.992601061 | 0.002670104 |
| <i>Rangap1</i>  | ENSMUSG00000022391 | 0.700664754  | 0.002670104 |
| <i>Gm3235</i>   | ENSMUSG00000090778 | -2.528914274 | 0.002670593 |
| <i>AV026068</i> | ENSMUSG00000100510 | -0.880990653 | 0.002685907 |
| <i>Relb</i>     | ENSMUSG00000002983 | 0.780278795  | 0.002697788 |
| <i>Plod2</i>    | ENSMUSG00000032374 | 0.799365892  | 0.002704598 |
| <i>Fem1b</i>    | ENSMUSG00000032244 | 0.902717319  | 0.002717621 |
| <i>Gm9800</i>   | ENSMUSG00000045799 | 1.10698583   | 0.002738865 |
| <i>Myh9</i>     | ENSMUSG00000022443 | 0.64300181   | 0.002745936 |
| <i>Ndufs2</i>   | ENSMUSG00000013593 | -0.558339312 | 0.002748805 |
| <i>Spns2</i>    | ENSMUSG00000040447 | 0.827011682  | 0.002750106 |
| <i>Clra</i>     | ENSMUSG00000055172 | -0.73286358  | 0.00275581  |
| <i>Ndufa10</i>  | ENSMUSG00000026260 | -0.547086388 | 0.002785636 |
| <i>Snn</i>      | ENSMUSG00000037972 | -0.789255016 | 0.002785636 |
| <i>Irf8</i>     | ENSMUSG00000041515 | 0.971954712  | 0.002785636 |
| <i>Rital</i>    | ENSMUSG00000029600 | -0.924822459 | 0.002785772 |
| <i>Pmp22</i>    | ENSMUSG00000018217 | 0.61420547   | 0.002807008 |
| <i>Tns2</i>     | ENSMUSG00000037003 | -0.555283952 | 0.002823849 |

|                      |                    |              |             |
|----------------------|--------------------|--------------|-------------|
| <i>Prps2</i>         | ENSMUSG00000025742 | -0.804910181 | 0.002845146 |
| <i>Rpn1</i>          | ENSMUSG00000030062 | 0.643621309  | 0.002846216 |
| <i>B3galt2</i>       | ENSMUSG00000033849 | -1.549839842 | 0.002846216 |
| <i>Sptb</i>          | ENSMUSG00000021061 | -1.043557601 | 0.002846216 |
| <i>Snx20</i>         | ENSMUSG00000031662 | 1.128108867  | 0.002850234 |
| <i>Klf13</i>         | ENSMUSG00000052040 | 0.74002551   | 0.00285071  |
| <i>Map2k1</i>        | ENSMUSG00000004936 | 0.594160495  | 0.002856468 |
| <i>Cd3d</i>          | ENSMUSG00000032094 | 2.970581548  | 0.002856468 |
| <i>Aurka</i>         | ENSMUSG00000027496 | 1.861641348  | 0.002856468 |
| <i>Spcs3</i>         | ENSMUSG00000054408 | 0.636510183  | 0.002862807 |
| <i>Kcnn1</i>         | ENSMUSG00000002908 | -0.915713682 | 0.002862807 |
| <i>Ak3</i>           | ENSMUSG00000024782 | -0.607231348 | 0.002874197 |
| <i>Trpm4</i>         | ENSMUSG00000038260 | -0.852970292 | 0.002881921 |
| <i>Irf7</i>          | ENSMUSG00000025498 | 0.76468808   | 0.002885573 |
| <i>Hspb1</i>         | ENSMUSG00000004951 | 0.765765914  | 0.002885573 |
| <i>Pgap2</i>         | ENSMUSG00000030990 | -0.664998873 | 0.002926396 |
| <i>Tarsl2</i>        | ENSMUSG00000030515 | -0.810902558 | 0.002927517 |
| <i>Ppil6</i>         | ENSMUSG00000078451 | -2.827536882 | 0.002928909 |
| <i>Zfp316</i>        | ENSMUSG00000046658 | -1.147489144 | 0.002934434 |
| <i>Ppif</i>          | ENSMUSG00000021868 | -0.71609031  | 0.002951806 |
| <i>Gm6560</i>        | ENSMUSG00000104913 | 0.955682602  | 0.00295204  |
| <i>Ubl7</i>          | ENSMUSG00000055720 | -0.616403438 | 0.002954105 |
| <i>Dmwd</i>          | ENSMUSG00000030410 | -0.615859582 | 0.002954105 |
| <i>2310022B05Rik</i> | ENSMUSG00000031983 | 0.727743133  | 0.002954105 |
| <i>Zadh2</i>         | ENSMUSG00000049090 | -0.605164328 | 0.002954105 |
| <i>Zbtb18</i>        | ENSMUSG00000063659 | -0.800064865 | 0.002963407 |
| <i>Ccdc85c</i>       | ENSMUSG00000084883 | -0.90597151  | 0.002967888 |
| <i>Serpina3f</i>     | ENSMUSG00000066363 | 2.506237283  | 0.002973014 |
| <i>Pla2g4a</i>       | ENSMUSG00000056220 | 0.747848929  | 0.002973014 |
| <i>Akr1a1</i>        | ENSMUSG00000028692 | 0.586240373  | 0.002973014 |
| <i>Jaml</i>          | ENSMUSG00000048534 | 2.775926587  | 0.002983353 |
| <i>Drosha</i>        | ENSMUSG00000022191 | -0.854115576 | 0.003017927 |
| <i>Chd3</i>          | ENSMUSG00000018474 | -0.902283471 | 0.003019825 |
| <i>Stum</i>          | ENSMUSG00000053963 | -4.093057376 | 0.003026888 |
| <i>Atp8b2</i>        | ENSMUSG00000060671 | 0.795267492  | 0.003042604 |
| <i>Asb4</i>          | ENSMUSG00000042607 | -1.437159488 | 0.003061553 |
| <i>Ankhd1</i>        | ENSMUSG00000024483 | -0.799756169 | 0.003061553 |
| <i>2310057M21Rik</i> | ENSMUSG00000040177 | 0.80053733   | 0.003071231 |
| <i>Zswim9</i>        | ENSMUSG00000070814 | -1.019703929 | 0.003076087 |
| <i>Hadha</i>         | ENSMUSG00000025745 | -0.674427217 | 0.003076097 |

|                      |                    |              |             |
|----------------------|--------------------|--------------|-------------|
| <i>Gm13657</i>       | ENSMUSG00000086813 | -4.699951353 | 0.003076097 |
| <i>Ptger4</i>        | ENSMUSG00000039942 | 1.040402077  | 0.00308784  |
| <i>Tc2n</i>          | ENSMUSG00000021187 | 2.120064215  | 0.003092813 |
| <i>Trp53inpl</i>     | ENSMUSG00000028211 | 0.800318199  | 0.00310038  |
| <i>Pygb</i>          | ENSMUSG00000033059 | -0.604198526 | 0.00310038  |
| <i>Wipfl</i>         | ENSMUSG00000075284 | 0.665643175  | 0.003112066 |
| <i>Kif20a</i>        | ENSMUSG00000003779 | 1.77008959   | 0.003113464 |
| <i>Fam213a</i>       | ENSMUSG00000021792 | -0.6596064   | 0.003118956 |
| <i>Taf1d</i>         | ENSMUSG00000031939 | 0.880237321  | 0.003119632 |
| <i>Cox6b2</i>        | ENSMUSG00000051811 | -1.925903835 | 0.003120276 |
| <i>Foxn2</i>         | ENSMUSG00000034998 | 0.848629699  | 0.003120276 |
| <i>Nrbp2</i>         | ENSMUSG00000075590 | -0.898941657 | 0.003122644 |
| <i>Gck</i>           | ENSMUSG00000041798 | 1.047031838  | 0.003122644 |
| <i>Eif4h</i>         | ENSMUSG00000040731 | 0.539041285  | 0.00313531  |
| <i>Irx2</i>          | ENSMUSG00000001504 | -1.507028682 | 0.00313531  |
| <i>Slf1</i>          | ENSMUSG00000021597 | -0.759199155 | 0.003146814 |
| <i>Smc6</i>          | ENSMUSG00000020608 | 0.593397489  | 0.003150015 |
| <i>Eef2k</i>         | ENSMUSG00000035064 | -0.792999891 | 0.003150015 |
| <i>Fbl</i>           | ENSMUSG00000046865 | 0.678442432  | 0.003151759 |
| <i>Cbr3</i>          | ENSMUSG00000022947 | 0.934842325  | 0.003153321 |
| <i>Gpr39</i>         | ENSMUSG00000026343 | 2.498199568  | 0.003153321 |
| <i>Grm1</i>          | ENSMUSG00000019828 | -1.063839059 | 0.003155197 |
| <i>Hdac5</i>         | ENSMUSG00000008855 | -0.668596774 | 0.003160994 |
| <i>Ccr1</i>          | ENSMUSG00000025804 | 0.966966684  | 0.003160994 |
| <i>Cyb5rl</i>        | ENSMUSG00000028621 | -0.965694391 | 0.003166226 |
| <i>Nmd3</i>          | ENSMUSG00000027787 | 0.652533919  | 0.003173732 |
| <i>9530026P05Rik</i> | ENSMUSG00000097462 | -1.368439382 | 0.003173732 |
| <i>Hspa4</i>         | ENSMUSG00000020361 | 0.543192207  | 0.003173732 |
| <i>Ndufs6b</i>       | ENSMUSG00000083820 | -1.610544359 | 0.003202331 |
| <i>Calm2</i>         | ENSMUSG00000036438 | 0.655288228  | 0.003207134 |
| <i>Ror1</i>          | ENSMUSG00000035305 | 1.131757796  | 0.0032191   |
| <i>Slc7a2</i>        | ENSMUSG00000031596 | -1.252161865 | 0.003220434 |
| <i>Ncor1</i>         | ENSMUSG00000018501 | -0.713497532 | 0.003220971 |
| <i>Tmem205</i>       | ENSMUSG00000040883 | -0.552049953 | 0.003241935 |
| <i>Ngfr</i>          | ENSMUSG00000000120 | 3.720519955  | 0.00325022  |
| <i>Syde2</i>         | ENSMUSG00000036863 | -0.843080146 | 0.00325022  |
| <i>Gpi1</i>          | ENSMUSG00000036427 | 0.770648755  | 0.003259101 |
| <i>Cacna2d1</i>      | ENSMUSG00000040118 | -0.666566445 | 0.00326894  |
| <i>Mlycd</i>         | ENSMUSG00000074064 | -0.643552846 | 0.003270742 |
| <i>Gdi2</i>          | ENSMUSG00000021218 | 0.675763977  | 0.003270742 |

|                      |                    |              |             |
|----------------------|--------------------|--------------|-------------|
| <i>Srpx</i>          | ENSMUSG00000090084 | 0.753897572  | 0.003283687 |
| <i>Ybx2</i>          | ENSMUSG00000018554 | -1.059356119 | 0.003283687 |
| <i>Rab7b</i>         | ENSMUSG00000052688 | 0.829085344  | 0.003309785 |
| <i>Cdkn2aipnl</i>    | ENSMUSG00000020392 | 0.69297469   | 0.003312459 |
| <i>Rala</i>          | ENSMUSG00000008859 | 0.595025508  | 0.003322442 |
| <i>Tmed5</i>         | ENSMUSG00000063406 | 0.704414842  | 0.003384498 |
| <i>C1s1</i>          | ENSMUSG00000038521 | -0.641052424 | 0.00339156  |
| <i>Ppp1r26</i>       | ENSMUSG00000035829 | -2.216008644 | 0.00339156  |
| <i>Zfp395</i>        | ENSMUSG00000034522 | -0.962718982 | 0.003401664 |
| <i>Elk3</i>          | ENSMUSG00000008398 | 0.70104324   | 0.003411333 |
| <i>Nipsnap3b</i>     | ENSMUSG00000015247 | 0.894078343  | 0.003411333 |
| <i>Ktn1</i>          | ENSMUSG00000021843 | -0.670762089 | 0.003411333 |
| <i>Alg5</i>          | ENSMUSG00000036632 | 0.718121418  | 0.003414717 |
| <i>Notch1</i>        | ENSMUSG00000026923 | -0.869547385 | 0.003415204 |
| <i>Kif23</i>         | ENSMUSG00000032254 | 1.716724215  | 0.003415204 |
| <i>Polr1a</i>        | ENSMUSG00000049553 | -0.770515347 | 0.003418353 |
| <i>Slc37a1</i>       | ENSMUSG00000024036 | -1.321606755 | 0.003426712 |
| <i>Bin3</i>          | ENSMUSG00000022089 | 0.891417257  | 0.003431868 |
| <i>Ogfod3</i>        | ENSMUSG00000025169 | -0.849881545 | 0.003436405 |
| <i>Cd300lf</i>       | ENSMUSG00000047798 | 5.238593085  | 0.0034452   |
| <i>Limd2</i>         | ENSMUSG00000040699 | 0.795047175  | 0.00344854  |
| <i>Mfsd4b3</i>       | ENSMUSG00000071335 | -1.164694055 | 0.003457317 |
| <i>Cdca4</i>         | ENSMUSG00000047832 | 0.889615643  | 0.003463864 |
| <i>Gm28651</i>       | ENSMUSG00000101086 | -1.472064326 | 0.003465574 |
| <i>Gjb5</i>          | ENSMUSG00000042357 | 2.551709388  | 0.003465574 |
| <i>6430571L13Rik</i> | ENSMUSG00000037977 | -1.445538197 | 0.00347465  |
| <i>Hsdl2</i>         | ENSMUSG00000028383 | -0.728112615 | 0.00347465  |
| <i>6-Mar</i>         | ENSMUSG00000039100 | -0.650260328 | 0.003486939 |
| <i>Lnpep</i>         | ENSMUSG00000023845 | -0.637981276 | 0.00349133  |
| <i>Gm15427</i>       | ENSMUSG00000081051 | 0.620913952  | 0.00349133  |
| <i>Rce1</i>          | ENSMUSG00000024889 | 0.846963911  | 0.003511022 |
| <i>Sema7a</i>        | ENSMUSG00000038264 | 0.920810597  | 0.003511075 |
| <i>Lrrc4b</i>        | ENSMUSG00000047085 | -1.216200591 | 0.003511075 |
| <i>Nr0b2</i>         | ENSMUSG00000037583 | -0.974945464 | 0.003511075 |
| <i>Gm13111</i>       | ENSMUSG00000085069 | -1.856714245 | 0.003531107 |
| <i>AC167229.1</i>    | ENSMUSG00000112831 | -2.081079547 | 0.003531501 |
| <i>Fcgr2b</i>        | ENSMUSG00000026656 | 0.745441136  | 0.003537927 |
| <i>Clic5</i>         | ENSMUSG00000023959 | 0.740864518  | 0.003544277 |
| <i>Klhl6</i>         | ENSMUSG00000043008 | 0.822718946  | 0.003544277 |
| <i>Tmem220</i>       | ENSMUSG00000050270 | -1.403248016 | 0.003546034 |

|                      |                    |              |             |
|----------------------|--------------------|--------------|-------------|
| <i>Fam214a</i>       | ENSMUSG00000034858 | -0.878819193 | 0.003546856 |
| <i>Tmem167</i>       | ENSMUSG00000012422 | 0.771866111  | 0.00357189  |
| <i>Zfp945</i>        | ENSMUSG00000059142 | -0.735412068 | 0.003577074 |
| <i>Cbr1</i>          | ENSMUSG00000051483 | -0.89774786  | 0.003590009 |
| <i>Nr1d2</i>         | ENSMUSG00000021775 | -0.573750124 | 0.003594079 |
| <i>Zpr1</i>          | ENSMUSG00000032078 | 0.667528355  | 0.003595347 |
| <i>5-Sep</i>         | ENSMUSG00000072214 | 1.526831656  | 0.003597708 |
| <i>Hr</i>            | ENSMUSG00000022096 | 0.778346828  | 0.003598475 |
| <i>Cbx6</i>          | ENSMUSG00000089715 | 0.642377859  | 0.003598811 |
| <i>Gm31013</i>       | ENSMUSG00000111867 | -0.867539086 | 0.003601992 |
| <i>Emilin2</i>       | ENSMUSG00000024053 | -0.838873204 | 0.003621284 |
| <i>Auts2</i>         | ENSMUSG00000029673 | -1.005016367 | 0.003634031 |
| <i>Cebpa</i>         | ENSMUSG00000034957 | 0.826652877  | 0.003634031 |
| <i>Cars2</i>         | ENSMUSG00000056228 | -0.765333517 | 0.003639244 |
| <i>4430402I18Rik</i> | ENSMUSG00000064202 | -0.755394458 | 0.003657679 |
| <i>Rnf4</i>          | ENSMUSG00000029110 | 0.60350587   | 0.003657679 |
| <i>Rnf150</i>        | ENSMUSG00000047747 | -0.78762828  | 0.003667245 |
| <i>Echdc2</i>        | ENSMUSG00000028601 | -0.795687974 | 0.003686224 |
| <i>Gm3534</i>        | ENSMUSG00000098192 | 3.278611619  | 0.003704774 |
| <i>Ubr3</i>          | ENSMUSG00000044308 | -0.634234937 | 0.003709677 |
| <i>Itgb5</i>         | ENSMUSG00000022817 | 0.766845562  | 0.003730181 |
| <i>Gatb</i>          | ENSMUSG00000028085 | -0.639822266 | 0.00374     |
| <i>Fndc1</i>         | ENSMUSG00000071984 | 0.882765996  | 0.00374     |
| <i>Ncoa7</i>         | ENSMUSG00000039697 | 0.913762547  | 0.00376037  |
| <i>Gpr157</i>        | ENSMUSG00000047875 | -0.835013273 | 0.003767616 |
| <i>0610009L18Rik</i> | ENSMUSG00000043644 | -0.951569832 | 0.003771605 |
| <i>Ttc32</i>         | ENSMUSG00000066637 | -0.923477456 | 0.00378643  |
| <i>Pfn1</i>          | ENSMUSG00000018293 | 0.559675849  | 0.003810488 |
| <i>Car9</i>          | ENSMUSG00000028463 | 2.402779962  | 0.003815206 |
| <i>Ltbr</i>          | ENSMUSG00000030339 | 0.634162161  | 0.003820593 |
| <i>Ppp1r3c</i>       | ENSMUSG00000067279 | 0.806111308  | 0.003828167 |
| <i>Rian</i>          | ENSMUSG00000097451 | 0.859832426  | 0.003830755 |
| <i>Bod11</i>         | ENSMUSG00000061755 | -0.797311853 | 0.003838457 |
| <i>Gm11992</i>       | ENSMUSG00000040978 | -3.022827174 | 0.003841043 |
| <i>Ifi47</i>         | ENSMUSG00000078920 | 0.905860668  | 0.003845771 |
| <i>Rpsa-ps2</i>      | ENSMUSG00000045055 | 0.796720417  | 0.003849678 |
| <i>Sptlc2</i>        | ENSMUSG00000021036 | 0.661308341  | 0.003852946 |
| <i>Cxadr</i>         | ENSMUSG00000022865 | -0.785676425 | 0.003894598 |
| <i>Ercc1</i>         | ENSMUSG00000003549 | 0.642654027  | 0.003907027 |
| <i>Far1</i>          | ENSMUSG00000030759 | 0.620752417  | 0.003908936 |

|                      |                    |              |             |
|----------------------|--------------------|--------------|-------------|
| <i>Gm5854</i>        | ENSMUSG00000115584 | 0.630072345  | 0.003910278 |
| <i>Gm42047</i>       | ENSMUSG00000110631 | 1.930821456  | 0.003923544 |
| <i>Ptgfrn</i>        | ENSMUSG00000027864 | 0.65860032   | 0.003932084 |
| <i>Fam84b</i>        | ENSMUSG00000072568 | -1.125051365 | 0.003936782 |
| <i>1700003E16Rik</i> | ENSMUSG00000030030 | -2.234347202 | 0.003953473 |
| <i>Maea</i>          | ENSMUSG00000079562 | 0.546903102  | 0.003953473 |
| <i>Dip2c</i>         | ENSMUSG00000048264 | -0.774753827 | 0.003953473 |
| <i>Gmppb</i>         | ENSMUSG00000070284 | 0.866347638  | 0.003955773 |
| <i>Mal</i>           | ENSMUSG00000027375 | -0.642041567 | 0.003960421 |
| <i>Dppa3</i>         | ENSMUSG00000046323 | 5.274626978  | 0.00397786  |
| <i>Ezh2</i>          | ENSMUSG00000029687 | 0.932326989  | 0.003981122 |
| <i>Cd209a</i>        | ENSMUSG00000031494 | 2.058888874  | 0.004004735 |
| <i>Akl</i>           | ENSMUSG00000026817 | -0.582917708 | 0.004017315 |
| <i>Itgb1</i>         | ENSMUSG00000025809 | 0.488362424  | 0.004025814 |
| <i>Cd300c2</i>       | ENSMUSG00000044811 | 1.319702101  | 0.004027853 |
| <i>Trap1</i>         | ENSMUSG00000005981 | -0.593385139 | 0.004036192 |
| <i>Tnip3</i>         | ENSMUSG00000044162 | -1.535581677 | 0.004059445 |
| <i>Pde1a</i>         | ENSMUSG00000059173 | 0.801606434  | 0.004063145 |
| <i>Sod2</i>          | ENSMUSG00000006818 | -0.665886336 | 0.004063954 |
| <i>Khk</i>           | ENSMUSG00000029162 | -0.698405657 | 0.004070071 |
| <i>Cap1</i>          | ENSMUSG00000028656 | 0.67723658   | 0.004070442 |
| <i>Snapiin</i>       | ENSMUSG00000001018 | -0.542448439 | 0.004084487 |
| <i>Rrm2</i>          | ENSMUSG00000020649 | 1.468394248  | 0.00409024  |
| <i>Zbtb20</i>        | ENSMUSG00000022708 | -0.75396152  | 0.004095784 |
| <i>Mlkl</i>          | ENSMUSG00000012519 | 1.06522768   | 0.004097495 |
| <i>1-Mar</i>         | ENSMUSG00000036469 | 1.153767599  | 0.004106013 |
| <i>Cttnbp2nl</i>     | ENSMUSG00000062127 | 0.834168199  | 0.004106013 |
| <i>Gorasp1</i>       | ENSMUSG00000032513 | -0.720167882 | 0.004123399 |
| <i>Ahdcl</i>         | ENSMUSG00000037692 | -0.858811276 | 0.004126778 |
| <i>A930024E05Rik</i> | ENSMUSG00000056735 | -5.698305304 | 0.004141511 |
| <i>Dcbl2</i>         | ENSMUSG00000035107 | 0.846280388  | 0.004150682 |
| <i>Slc5a6</i>        | ENSMUSG00000006641 | -1.107628919 | 0.004217673 |
| <i>Rxra</i>          | ENSMUSG00000015846 | -0.650320552 | 0.004223829 |
| <i>Rap1a</i>         | ENSMUSG00000068798 | 0.520844146  | 0.004224772 |
| <i>Prpf8</i>         | ENSMUSG00000020850 | -0.637126797 | 0.004237121 |
| <i>Hnrnpa3</i>       | ENSMUSG00000059005 | 0.62356381   | 0.004244831 |
| <i>Cct3</i>          | ENSMUSG00000001416 | 0.579549275  | 0.004249443 |
| <i>Mmachc</i>        | ENSMUSG00000028690 | -0.689461362 | 0.004273267 |
| <i>Rhobtb2</i>       | ENSMUSG00000022075 | -0.873931533 | 0.004288472 |
| <i>Cnot1</i>         | ENSMUSG00000036550 | -0.739226081 | 0.004297913 |



|                 |                    |              |             |
|-----------------|--------------------|--------------|-------------|
| <i>Isoc1</i>    | ENSMUSG00000024601 | -0.731745574 | 0.00432728  |
| <i>Kmt2d</i>    | ENSMUSG00000048154 | -0.910250029 | 0.004350276 |
| <i>Calm3</i>    | ENSMUSG00000019370 | 0.545273691  | 0.004368399 |
| <i>Cenpv</i>    | ENSMUSG00000018509 | -0.834867958 | 0.004383368 |
| <i>Ssu72</i>    | ENSMUSG00000029038 | 0.571796039  | 0.004385991 |
| <i>Pnp</i>      | ENSMUSG00000115338 | 0.8672078    | 0.004394112 |
| <i>Zfp799</i>   | ENSMUSG00000095253 | -1.062540156 | 0.004417087 |
| <i>Cttnbip1</i> | ENSMUSG00000028988 | 0.730158233  | 0.004417286 |
| <i>Sord</i>     | ENSMUSG00000027227 | -0.756934778 | 0.004422655 |
| <i>Hras</i>     | ENSMUSG00000025499 | 0.536983157  | 0.004473873 |
| <i>Nelfe</i>    | ENSMUSG00000024369 | 0.670096672  | 0.004488581 |
| <i>Ndrp2</i>    | ENSMUSG00000004558 | -0.533208625 | 0.00450352  |
| <i>AA467197</i> | ENSMUSG00000033213 | 2.709333127  | 0.004518369 |
| <i>Eif3c</i>    | ENSMUSG00000030738 | 0.741262942  | 0.00452462  |
| <i>Psrc1</i>    | ENSMUSG00000068744 | 1.770772634  | 0.004552533 |
| <i>Aacs</i>     | ENSMUSG00000029482 | 1.110687711  | 0.004565371 |
| <i>Lfng</i>     | ENSMUSG00000029570 | 0.753391212  | 0.004565592 |
| <i>Limch1</i>   | ENSMUSG00000037736 | -0.631537003 | 0.004590165 |
| <i>Tmem255b</i> | ENSMUSG00000038457 | 1.60750951   | 0.004600202 |
| <i>Ankrd13a</i> | ENSMUSG00000041870 | 0.625998517  | 0.004626872 |
| <i>Rpl15</i>    | ENSMUSG00000012405 | 0.544855195  | 0.004629369 |
| <i>Gm10131</i>  | ENSMUSG00000063412 | 0.80649505   | 0.004629369 |
| <i>Ryk</i>      | ENSMUSG00000032547 | 0.56992596   | 0.004641149 |
| <i>Ppp1r3b</i>  | ENSMUSG00000046794 | -0.935935453 | 0.004646372 |
| <i>Scn10a</i>   | ENSMUSG00000034533 | -2.257338184 | 0.004646372 |
| <i>Zrsr1</i>    | ENSMUSG00000044068 | -0.781938403 | 0.004650256 |
| <i>Xpnpep1</i>  | ENSMUSG00000025027 | 0.560214148  | 0.004651023 |
| <i>Kifc2</i>    | ENSMUSG00000004187 | -1.557657202 | 0.004651559 |
| <i>Colgalt1</i> | ENSMUSG00000034807 | 0.585283728  | 0.004666913 |
| <i>Skidal</i>   | ENSMUSG00000054074 | -1.407962674 | 0.00466899  |
| <i>Rgs2</i>     | ENSMUSG00000026360 | -0.666607138 | 0.004681646 |
| <i>Padi4</i>    | ENSMUSG00000025330 | 1.797353374  | 0.004686204 |
| <i>Dsc2</i>     | ENSMUSG00000024331 | -0.768582285 | 0.004702353 |
| <i>Apobec1</i>  | ENSMUSG00000040613 | 0.883474547  | 0.004711014 |
| <i>Eif5a2</i>   | ENSMUSG00000050192 | 1.10857567   | 0.004711014 |
| <i>Apobec2</i>  | ENSMUSG00000040694 | -0.563906794 | 0.004726189 |
| <i>Aif1</i>     | ENSMUSG00000024397 | 0.944408676  | 0.004734904 |
| <i>Cdc14b</i>   | ENSMUSG00000033102 | -1.06571136  | 0.004734956 |
| <i>Abhd15</i>   | ENSMUSG00000000686 | 2.592718868  | 0.004742822 |
| <i>Eprs</i>     | ENSMUSG00000026615 | 0.77552771   | 0.004758736 |

|                      |                    |              |             |
|----------------------|--------------------|--------------|-------------|
| <i>Ptpn22</i>        | ENSMUSG00000027843 | 1.823334814  | 0.004772866 |
| <i>Olfir1033</i>     | ENSMUSG00000045392 | 0.803016119  | 0.00480492  |
| <i>P4ha3</i>         | ENSMUSG00000051048 | 2.583338727  | 0.00481093  |
| <i>Homer3</i>        | ENSMUSG00000003573 | 0.971735643  | 0.004817044 |
| <i>Mak16</i>         | ENSMUSG00000031578 | 0.82504581   | 0.004821677 |
| <i>Tmem29</i>        | ENSMUSG00000041353 | 1.131785692  | 0.004828964 |
| <i>Ssrp1</i>         | ENSMUSG00000027067 | 0.558798858  | 0.004828964 |
| <i>Disp1</i>         | ENSMUSG00000030768 | -1.017601401 | 0.004831123 |
| <i>Abi1</i>          | ENSMUSG00000058835 | 0.622314328  | 0.004853936 |
| <i>Cln1</i>          | ENSMUSG00000029862 | -2.786956115 | 0.004860037 |
| <i>Tipin</i>         | ENSMUSG00000032397 | 0.755951105  | 0.004875321 |
| <i>Gm10288</i>       | ENSMUSG00000070343 | 0.910852401  | 0.004881469 |
| <i>Znhit2</i>        | ENSMUSG00000075227 | 0.661630789  | 0.004894527 |
| <i>Csnk1g3</i>       | ENSMUSG00000073563 | 0.695832115  | 0.004916684 |
| <i>Hmcn1</i>         | ENSMUSG00000066842 | -0.837633916 | 0.004916684 |
| <i>Dph5</i>          | ENSMUSG00000033554 | 0.861314305  | 0.004931142 |
| <i>Ablim2</i>        | ENSMUSG00000029095 | -0.905519313 | 0.004952149 |
| <i>Pitpnm3</i>       | ENSMUSG00000040543 | -1.994775613 | 0.004963089 |
| <i>Tra2b</i>         | ENSMUSG00000022858 | 0.530220878  | 0.004965518 |
| <i>Wdr6</i>          | ENSMUSG00000066357 | -0.876320324 | 0.004965518 |
| <i>Anxa4</i>         | ENSMUSG00000029994 | 0.665256133  | 0.004965518 |
| <i>Kcnd2</i>         | ENSMUSG00000060882 | -1.286265894 | 0.004976138 |
| <i>2610035D17Rik</i> | ENSMUSG00000087259 | -1.001252504 | 0.004991573 |
| <i>Pcmt1</i>         | ENSMUSG00000051285 | -0.58043536  | 0.004992425 |
| <i>Ftl1-ps1</i>      | ENSMUSG00000062382 | 0.883672352  | 0.005008934 |
| <i>Tmem200a</i>      | ENSMUSG00000049420 | 4.617378486  | 0.005018731 |
| <i>Il7r</i>          | ENSMUSG00000003882 | 2.415570084  | 0.005038911 |
| <i>Rhou</i>          | ENSMUSG00000039960 | 0.784410957  | 0.005040307 |
| <i>Dlgap5</i>        | ENSMUSG00000037544 | 2.004841275  | 0.005051678 |
| <i>Fryl</i>          | ENSMUSG00000070733 | -0.835964992 | 0.005057773 |
| <i>Bcl9</i>          | ENSMUSG00000038256 | -1.131339155 | 0.005057773 |
| <i>C9orf72</i>       | ENSMUSG00000028300 | -0.682278331 | 0.005057773 |
| <i>Slc22a4</i>       | ENSMUSG00000020334 | 1.320768109  | 0.005066059 |
| <i>Esyt3</i>         | ENSMUSG00000037681 | -4.006171285 | 0.005068225 |
| <i>Kmt2b</i>         | ENSMUSG00000006307 | -0.941202836 | 0.005078747 |
| <i>Mybl2</i>         | ENSMUSG00000017861 | 2.592778384  | 0.005101587 |
| <i>Klfl5</i>         | ENSMUSG00000030087 | -0.823413157 | 0.005109729 |
| <i>Il15ra</i>        | ENSMUSG00000023206 | -0.900103667 | 0.005123705 |
| <i>Renbp</i>         | ENSMUSG00000031387 | 0.918364761  | 0.005123705 |
| <i>Lysmd4</i>        | ENSMUSG00000043831 | -0.772372832 | 0.005179254 |

|                 |                    |              |             |
|-----------------|--------------------|--------------|-------------|
| <i>Syt3</i>     | ENSMUSG00000030731 | -1.520093842 | 0.005201459 |
| <i>Tmem245</i>  | ENSMUSG00000055296 | -0.66036351  | 0.005221585 |
| <i>Ubxn10</i>   | ENSMUSG00000043621 | -1.176465842 | 0.00526583  |
| <i>Mtus2</i>    | ENSMUSG00000029651 | -0.605054134 | 0.00529478  |
| <i>Shank3</i>   | ENSMUSG00000022623 | -0.734170234 | 0.005326592 |
| <i>Smarcc2</i>  | ENSMUSG00000025369 | -0.573877841 | 0.005335009 |
| <i>Mblac2</i>   | ENSMUSG00000051098 | -1.195645493 | 0.005335009 |
| <i>Llph</i>     | ENSMUSG00000020224 | 0.737677671  | 0.005365723 |
| <i>Tro</i>      | ENSMUSG00000025272 | 2.005697975  | 0.005370355 |
| <i>Myef2</i>    | ENSMUSG00000027201 | 1.082738665  | 0.005370355 |
| <i>BE692007</i> | ENSMUSG00000099757 | 1.258795554  | 0.005370355 |
| <i>Helz</i>     | ENSMUSG00000020721 | -0.977658033 | 0.005400998 |
| <i>Pvalb</i>    | ENSMUSG00000005716 | -1.88549207  | 0.005408057 |
| <i>Hmgn1</i>    | ENSMUSG00000040681 | 0.592264829  | 0.005410004 |
| <i>Gm45145</i>  | ENSMUSG00000109076 | -5.663341332 | 0.005424578 |
| <i>Idh3b</i>    | ENSMUSG00000027406 | -0.540038214 | 0.005445884 |
| <i>Hck</i>      | ENSMUSG00000003283 | 1.023973591  | 0.005451755 |
| <i>Zmym3</i>    | ENSMUSG00000031310 | -0.881878461 | 0.005461618 |
| <i>Hells</i>    | ENSMUSG00000025001 | 1.82211572   | 0.005473298 |
| <i>Psmbl1</i>   | ENSMUSG00000014769 | 0.486497526  | 0.005473298 |
| <i>Hnrnpab</i>  | ENSMUSG00000020358 | 0.543143585  | 0.005484754 |
| <i>Mif4gd</i>   | ENSMUSG00000020743 | -0.639853353 | 0.00548887  |
| <i>Cdca7</i>    | ENSMUSG00000055612 | 1.699616262  | 0.005496889 |
| <i>Katna1</i>   | ENSMUSG00000019794 | 0.717670256  | 0.005516006 |
| <i>Tmem136</i>  | ENSMUSG00000048503 | -0.884634476 | 0.005516006 |
| <i>Zfand1</i>   | ENSMUSG00000039795 | -0.663088645 | 0.005520633 |
| <i>Plat</i>     | ENSMUSG00000031538 | 0.688011386  | 0.005520633 |
| <i>Slc35b1</i>  | ENSMUSG00000020873 | 0.602521026  | 0.005520633 |
| <i>Papd4</i>    | ENSMUSG00000042167 | 0.686878174  | 0.005520633 |
| <i>Slc38a3</i>  | ENSMUSG00000010064 | -1.025086223 | 0.005520633 |
| <i>Psmc4</i>    | ENSMUSG00000030603 | 0.514310147  | 0.005553084 |
| <i>Ndufs6</i>   | ENSMUSG00000021606 | -0.719557916 | 0.005553084 |
| <i>Rpl13</i>    | ENSMUSG00000000740 | 0.538123403  | 0.005553189 |
| <i>Gimap6</i>   | ENSMUSG00000047867 | 0.630457958  | 0.005553189 |
| <i>Aard</i>     | ENSMUSG00000068522 | 2.199867342  | 0.005586469 |
| <i>Bsg</i>      | ENSMUSG00000023175 | 0.572189914  | 0.005594518 |
| <i>Exosc5</i>   | ENSMUSG00000061286 | 0.649714111  | 0.005616232 |
| <i>Slc12a6</i>  | ENSMUSG00000027130 | -0.80138767  | 0.005636047 |
| <i>Cacna1h</i>  | ENSMUSG00000024112 | -2.65763994  | 0.005636047 |
| <i>Sec22b</i>   | ENSMUSG00000027879 | 0.581196394  | 0.005636047 |

|                  |                    |              |             |
|------------------|--------------------|--------------|-------------|
| <i>Arpc3</i>     | ENSMUSG00000029465 | 0.575670572  | 0.005648406 |
| <i>Phactr2</i>   | ENSMUSG00000062866 | -0.656603811 | 0.005660056 |
| <i>Meis1</i>     | ENSMUSG00000020160 | -0.851497375 | 0.005660056 |
| <i>Cgrefl</i>    | ENSMUSG00000029161 | 1.634468388  | 0.005691304 |
| <i>Oxal1</i>     | ENSMUSG00000000959 | -0.537743038 | 0.00570561  |
| <i>Rplp1</i>     | ENSMUSG00000007892 | 0.684312126  | 0.005742955 |
| <i>Gm26809</i>   | ENSMUSG00000097815 | -0.81417895  | 0.005750241 |
| <i>Slc1a4</i>    | ENSMUSG00000020142 | 1.296822536  | 0.005750241 |
| <i>Ano1</i>      | ENSMUSG00000031075 | -1.190579505 | 0.005754938 |
| <i>Flt3</i>      | ENSMUSG00000042817 | 3.060035376  | 0.005756678 |
| <i>Ptch1</i>     | ENSMUSG00000021466 | -1.09422523  | 0.005759496 |
| <i>Tmem65</i>    | ENSMUSG00000062373 | -0.698085951 | 0.005774318 |
| <i>Fkbp7</i>     | ENSMUSG00000002732 | 0.695996503  | 0.005774318 |
| <i>Qsox2</i>     | ENSMUSG00000036327 | -0.974425441 | 0.005801269 |
| <i>C7</i>        | ENSMUSG00000079105 | -1.018918054 | 0.005813932 |
| <i>Grip2</i>     | ENSMUSG00000030098 | -1.366580254 | 0.005815973 |
| <i>Ywhab</i>     | ENSMUSG00000018326 | 0.505584145  | 0.005816425 |
| <i>Acsm5</i>     | ENSMUSG00000030972 | -1.981329852 | 0.005825517 |
| <i>Gm32369</i>   | ENSMUSG00000112950 | -3.398773238 | 0.005828046 |
| <i>Plpp1</i>     | ENSMUSG00000021759 | 0.606056616  | 0.005836198 |
| <i>Slc35e1</i>   | ENSMUSG00000019731 | -0.669077498 | 0.005878457 |
| <i>Necap2</i>    | ENSMUSG00000028923 | 0.740245583  | 0.005891842 |
| <i>Adprhl1</i>   | ENSMUSG00000031448 | -0.511074898 | 0.005893698 |
| <i>Probl</i>     | ENSMUSG00000073600 | -0.764624026 | 0.005893698 |
| <i>Psm3</i>      | ENSMUSG00000060073 | 0.515901614  | 0.005894275 |
| <i>Synj2</i>     | ENSMUSG00000023805 | -0.771850899 | 0.005894736 |
| <i>Ramp1</i>     | ENSMUSG00000034353 | -0.767957777 | 0.005894736 |
| <i>Gsta4</i>     | ENSMUSG00000032348 | -0.67718351  | 0.005894736 |
| <i>Gipc1</i>     | ENSMUSG00000019433 | 0.570925974  | 0.005894736 |
| <i>Gpc1</i>      | ENSMUSG00000034220 | -0.727045324 | 0.005894736 |
| <i>Rexo2</i>     | ENSMUSG00000032026 | 0.636351903  | 0.005899155 |
| <i>Fxyd6</i>     | ENSMUSG00000066705 | 0.797263878  | 0.005899155 |
| <i>Hist1h2be</i> | ENSMUSG00000047246 | -1.152908143 | 0.005901199 |
| <i>Paip2b</i>    | ENSMUSG00000045896 | -0.605873816 | 0.005912936 |
| <i>Golga7</i>    | ENSMUSG00000015341 | 0.543121386  | 0.005921855 |
| <i>Zfp467</i>    | ENSMUSG00000068551 | -0.982078525 | 0.005934775 |
| <i>Pgrmc1</i>    | ENSMUSG00000006373 | 0.582048958  | 0.005973289 |
| <i>Fam104a</i>   | ENSMUSG00000041629 | 0.644135035  | 0.005982103 |
| <i>Gm5526</i>    | ENSMUSG00000084817 | 1.623343023  | 0.005992546 |
| <i>Zfp106</i>    | ENSMUSG00000027288 | -0.647685706 | 0.006007081 |

|                      |                    |              |             |
|----------------------|--------------------|--------------|-------------|
| <i>2310015D24Rik</i> | ENSMUSG00000099411 | -2.220607919 | 0.006052784 |
| <i>Aars</i>          | ENSMUSG00000031960 | 0.609630295  | 0.006072351 |
| <i>Foxo6os</i>       | ENSMUSG00000084929 | -1.434490057 | 0.006074138 |
| <i>Ckm</i>           | ENSMUSG00000030399 | -0.823862872 | 0.006075888 |
| <i>Arhgap27</i>      | ENSMUSG00000034255 | 0.903453391  | 0.006075888 |
| <i>Nudt7</i>         | ENSMUSG00000031767 | -0.655387482 | 0.006099966 |
| <i>Cd53</i>          | ENSMUSG00000040747 | 0.782108628  | 0.006099966 |
| <i>Sema6c</i>        | ENSMUSG00000038777 | -1.673585225 | 0.006099966 |
| <i>Wdr4</i>          | ENSMUSG00000024037 | 0.927380228  | 0.00610504  |
| <i>St3gal4</i>       | ENSMUSG00000032038 | -0.56698539  | 0.006129731 |
| <i>Arfip2</i>        | ENSMUSG00000030881 | 0.701092401  | 0.006129731 |
| <i>Flna</i>          | ENSMUSG00000031328 | 0.548525569  | 0.006136498 |
| <i>Jph1</i>          | ENSMUSG00000042686 | -0.746782505 | 0.00614671  |
| <i>Gm26862</i>       | ENSMUSG00000097644 | -2.19914292  | 0.006154011 |
| <i>Gpt</i>           | ENSMUSG00000022546 | -0.894723091 | 0.006200662 |
| <i>Cavin1</i>        | ENSMUSG00000004044 | 0.488503193  | 0.006208205 |
| <i>Cct2</i>          | ENSMUSG00000034024 | 0.544136198  | 0.006209588 |
| <i>Mfsd7a</i>        | ENSMUSG00000029490 | -1.621448282 | 0.006264342 |
| <i>Gmfg</i>          | ENSMUSG00000060791 | 0.872239905  | 0.006270154 |
| <i>Adamts5</i>       | ENSMUSG00000022894 | 0.627706703  | 0.006309619 |
| <i>Rnf5</i>          | ENSMUSG00000015478 | -0.983463983 | 0.006322553 |
| <i>Rps6-ps4</i>      | ENSMUSG00000081406 | 0.619004478  | 0.00637856  |
| <i>Mtmr2</i>         | ENSMUSG00000031918 | 0.615721594  | 0.006381594 |
| <i>Atpaf1</i>        | ENSMUSG00000028710 | -0.749669943 | 0.006417932 |
| <i>Dio3os</i>        | ENSMUSG00000113581 | 2.512153443  | 0.006418474 |
| <i>Fam107b</i>       | ENSMUSG00000026655 | 0.995642468  | 0.006431355 |
| <i>Pi15</i>          | ENSMUSG00000067780 | 1.175034211  | 0.006435735 |
| <i>Pmpca</i>         | ENSMUSG00000026926 | -0.556190448 | 0.006435735 |
| <i>Gm5559</i>        | ENSMUSG00000096617 | 0.812007893  | 0.006443829 |
| <i>Hsd17b12</i>      | ENSMUSG00000027195 | 0.597786073  | 0.006443829 |
| <i>Gzma</i>          | ENSMUSG00000023132 | 1.840431949  | 0.006460834 |
| <i>Clta</i>          | ENSMUSG00000028478 | 0.525121667  | 0.006473058 |
| <i>Npr2</i>          | ENSMUSG00000028469 | -0.682872421 | 0.006473058 |
| <i>Fmnl2</i>         | ENSMUSG00000036053 | 0.788521997  | 0.006493274 |
| <i>Rxrg</i>          | ENSMUSG00000015843 | -0.756278303 | 0.006507637 |
| <i>Pgm3</i>          | ENSMUSG00000056131 | 0.957860277  | 0.006531903 |
| <i>Rab27b</i>        | ENSMUSG00000024511 | 1.31863311   | 0.006573663 |
| <i>Rph3al</i>        | ENSMUSG00000020847 | -1.056492531 | 0.006573828 |
| <i>Phf10</i>         | ENSMUSG00000023883 | 0.606489854  | 0.006598137 |
| <i>Kif20b</i>        | ENSMUSG00000024795 | 1.811233097  | 0.006598137 |

|                 |                    |              |             |
|-----------------|--------------------|--------------|-------------|
| <i>Ndufs1</i>   | ENSMUSG00000025968 | -0.668109775 | 0.006625564 |
| <i>Gm6204</i>   | ENSMUSG00000105879 | 1.704554358  | 0.006625608 |
| <i>Gm26808</i>  | ENSMUSG00000097489 | -3.065264357 | 0.006648908 |
| <i>Mgam</i>     | ENSMUSG00000068587 | 2.986691937  | 0.006648908 |
| <i>mt-Te</i>    | ENSMUSG00000064369 | -2.398230333 | 0.006696684 |
| <i>Hist1h1c</i> | ENSMUSG00000036181 | 0.49967768   | 0.006696684 |
| <i>Gm31600</i>  | ENSMUSG00000114800 | -5.573975945 | 0.006749664 |
| <i>Cox15</i>    | ENSMUSG00000040018 | -0.619662555 | 0.006751939 |
| <i>Pole3</i>    | ENSMUSG00000028394 | 0.56708642   | 0.0067648   |
| <i>Mtg2</i>     | ENSMUSG00000039069 | -0.680671835 | 0.00676902  |
| <i>Junb</i>     | ENSMUSG00000052837 | 1.032488317  | 0.006769861 |
| <i>Rpl36a</i>   | ENSMUSG00000079435 | 0.782695457  | 0.006774353 |
| <i>Atg10</i>    | ENSMUSG00000021619 | -0.65583478  | 0.006789282 |
| <i>Rps4x</i>    | ENSMUSG00000031320 | 0.543040332  | 0.006813331 |
| <i>Timm29</i>   | ENSMUSG00000048429 | -0.587042656 | 0.006817853 |
| <i>Chaf1a</i>   | ENSMUSG00000002835 | 1.122465838  | 0.006817853 |
| <i>Gal3st2c</i> | ENSMUSG00000073608 | -2.012844455 | 0.006824558 |
| <i>Sox9</i>     | ENSMUSG00000000567 | 1.200639093  | 0.006832275 |
| <i>Trappc10</i> | ENSMUSG00000000374 | -0.639773365 | 0.006832275 |
| <i>Intu</i>     | ENSMUSG00000060798 | -0.79989471  | 0.006838962 |
| <i>Daam1</i>    | ENSMUSG00000034574 | -0.656154608 | 0.006841881 |
| <i>Kdm1b</i>    | ENSMUSG00000038080 | -0.781709727 | 0.006877415 |
| <i>Etf1f1</i>   | ENSMUSG00000040370 | -0.617464686 | 0.006877415 |
| <i>Clqb</i>     | ENSMUSG00000036905 | 0.70167719   | 0.006893697 |
| <i>Cavin4</i>   | ENSMUSG00000028348 | 0.671008769  | 0.006905496 |
| <i>Fam50a</i>   | ENSMUSG00000001962 | 0.597833347  | 0.006914282 |
| <i>Pkig</i>     | ENSMUSG00000035268 | -0.5016203   | 0.006914282 |
| <i>Ptger3</i>   | ENSMUSG00000040016 | 3.2687732    | 0.006914282 |
| <i>Numbl</i>    | ENSMUSG00000063160 | 0.770447884  | 0.006921605 |
| <i>Till11</i>   | ENSMUSG00000026885 | 1.206696851  | 0.0069265   |
| <i>Unc45b</i>   | ENSMUSG00000018845 | -0.828673619 | 0.0069265   |
| <i>Tpm3-rs7</i> | ENSMUSG00000058126 | 0.892881088  | 0.006931887 |
| <i>Cyp4f18</i>  | ENSMUSG00000003484 | 1.656554182  | 0.006942844 |
| <i>Gm15640</i>  | ENSMUSG00000085781 | 5.056504377  | 0.006945209 |
| <i>Unc13b</i>   | ENSMUSG00000028456 | -0.731253786 | 0.006945209 |
| <i>Klhl29</i>   | ENSMUSG00000020627 | 1.89145935   | 0.006965086 |
| <i>Vat1</i>     | ENSMUSG00000034993 | 0.770867853  | 0.006966144 |
| <i>Slc39a11</i> | ENSMUSG00000041654 | 1.031449845  | 0.006966144 |
| <i>Asl</i>      | ENSMUSG00000025533 | 0.786817821  | 0.006971823 |
| <i>Amigo1</i>   | ENSMUSG00000050947 | -0.803830785 | 0.006974583 |

|                      |                    |              |             |
|----------------------|--------------------|--------------|-------------|
| <i>Mgmt</i>          | ENSMUSG00000054612 | -0.774909067 | 0.006974583 |
| <i>Rad51</i>         | ENSMUSG00000027323 | 1.622359639  | 0.006974583 |
| <i>Zfp568</i>        | ENSMUSG00000074221 | 0.853037443  | 0.006974583 |
| <i>Mef2a</i>         | ENSMUSG00000030557 | -0.570347709 | 0.006974583 |
| <i>Gm13054</i>       | ENSMUSG00000086806 | 4.509951514  | 0.006977148 |
| <i>Immp11</i>        | ENSMUSG00000042670 | -0.541057983 | 0.00698552  |
| <i>Myo1b</i>         | ENSMUSG00000018417 | 0.829917613  | 0.006990612 |
| <i>Gm2962</i>        | ENSMUSG00000089838 | -1.077158597 | 0.006990978 |
| <i>Haus3</i>         | ENSMUSG00000079555 | 0.93384849   | 0.006998369 |
| <i>Klf2</i>          | ENSMUSG00000055148 | 0.788373091  | 0.007045139 |
| <i>Gulp1</i>         | ENSMUSG00000056870 | 0.758271836  | 0.007097252 |
| <i>Pnpla7</i>        | ENSMUSG00000036833 | -0.816152567 | 0.007098028 |
| <i>Gpr27</i>         | ENSMUSG00000072875 | -1.001570624 | 0.007098028 |
| <i>Pink1</i>         | ENSMUSG00000028756 | -0.52490653  | 0.007098028 |
| <i>Oip5</i>          | ENSMUSG00000072980 | 2.242919416  | 0.007117397 |
| <i>Jmjd8</i>         | ENSMUSG00000025736 | -0.989863495 | 0.00711886  |
| <i>2200002D01Rik</i> | ENSMUSG00000030587 | 1.46384017   | 0.007124612 |
| <i>1810044D09Rik</i> | ENSMUSG00000100680 | -1.323626878 | 0.007153799 |
| <i>Ogdhl</i>         | ENSMUSG00000021913 | -1.675840034 | 0.007173038 |
| <i>Bcl9l</i>         | ENSMUSG00000063382 | -0.823329589 | 0.007173038 |
| <i>Pde9a</i>         | ENSMUSG00000041119 | 1.008510929  | 0.007178322 |
| <i>Ptgr2</i>         | ENSMUSG00000072946 | -0.555220549 | 0.007194196 |
| <i>Cry2</i>          | ENSMUSG00000068742 | -0.60367143  | 0.007194247 |
| <i>Rab8a</i>         | ENSMUSG00000003037 | 0.547500173  | 0.007194247 |
| <i>Lrrc58</i>        | ENSMUSG00000034158 | 0.563875203  | 0.007220707 |
| <i>Nop58</i>         | ENSMUSG00000026020 | 0.690822779  | 0.007220707 |
| <i>Sirpb1c</i>       | ENSMUSG00000074677 | 2.547008864  | 0.007246235 |
| <i>Mtss1</i>         | ENSMUSG00000022353 | -0.693449087 | 0.007256291 |
| <i>Fam120c</i>       | ENSMUSG00000025262 | -1.242070625 | 0.007269487 |
| <i>Stx2</i>          | ENSMUSG00000029428 | 0.667616684  | 0.007300212 |
| <i>Ip6k3</i>         | ENSMUSG00000024210 | 1.064995841  | 0.00731545  |
| <i>Tprn</i>          | ENSMUSG00000048707 | 1.096188028  | 0.007322322 |
| <i>Adcy7</i>         | ENSMUSG00000031659 | 0.942306654  | 0.007328676 |
| <i>Tpp1</i>          | ENSMUSG00000030894 | -0.620645365 | 0.007332666 |
| <i>Rcsd1</i>         | ENSMUSG00000040723 | -0.543070911 | 0.007365783 |
| <i>Coro1b</i>        | ENSMUSG00000024835 | 0.560847432  | 0.007365865 |
| <i>Eid2b</i>         | ENSMUSG00000070705 | -0.749314601 | 0.007405117 |
| <i>Nobl</i>          | ENSMUSG00000003848 | 0.628156499  | 0.007424949 |
| <i>Osbp</i>          | ENSMUSG00000024687 | -0.567817203 | 0.007437955 |
| <i>Psap</i>          | ENSMUSG00000004207 | -0.562754645 | 0.007485898 |

|                 |                    |              |             |
|-----------------|--------------------|--------------|-------------|
| <i>Adm2</i>     | ENSMUSG00000054136 | 3.674332713  | 0.007490254 |
| <i>Eno3</i>     | ENSMUSG00000060600 | -0.753069191 | 0.007493951 |
| <i>Sbno2</i>    | ENSMUSG00000035673 | 0.793679815  | 0.00752484  |
| <i>Nectin3</i>  | ENSMUSG00000022656 | 0.826855932  | 0.007565321 |
| <i>Kctd5</i>    | ENSMUSG00000016946 | 0.712700938  | 0.007591967 |
| <i>Med12l</i>   | ENSMUSG00000056476 | -1.643750911 | 0.007594156 |
| <i>Dnd1</i>     | ENSMUSG00000044595 | -1.969332561 | 0.007618195 |
| <i>Magix</i>    | ENSMUSG00000031147 | -1.096894057 | 0.007618195 |
| <i>Rgs10</i>    | ENSMUSG00000030844 | 0.770112536  | 0.007651015 |
| <i>Tbc1d10a</i> | ENSMUSG00000034412 | 0.803472985  | 0.007670481 |
| <i>Pcyt2</i>    | ENSMUSG00000025137 | -0.613250005 | 0.007676181 |
| <i>Tyro3</i>    | ENSMUSG00000027298 | 1.155630066  | 0.007682229 |
| <i>Rorc</i>     | ENSMUSG00000028150 | -0.621776909 | 0.00770757  |
| <i>Sec62</i>    | ENSMUSG00000027706 | 0.6099118    | 0.00770757  |
| <i>Prr33</i>    | ENSMUSG00000043795 | -1.431096077 | 0.00770757  |
| <i>Napsa</i>    | ENSMUSG00000002204 | 2.300920043  | 0.007715737 |
| <i>Galnt15</i>  | ENSMUSG00000021903 | -0.597904    | 0.007715737 |
| <i>Chst4</i>    | ENSMUSG00000035930 | -1.258466466 | 0.007716037 |
| <i>Stard10</i>  | ENSMUSG00000030688 | -0.664529384 | 0.007716037 |
| <i>Misl8a</i>   | ENSMUSG00000022978 | 1.037666079  | 0.007750496 |
| <i>Fem1a</i>    | ENSMUSG00000043683 | -0.667555157 | 0.007782264 |
| <i>Fbln1</i>    | ENSMUSG00000006369 | -0.726965032 | 0.007807377 |
| <i>Comt</i>     | ENSMUSG00000000326 | 0.592258057  | 0.007829954 |
| <i>Gss</i>      | ENSMUSG00000027610 | 0.719031192  | 0.00783362  |
| <i>Mid1ip1</i>  | ENSMUSG00000008035 | -1.631688835 | 0.00784239  |
| <i>Itsn1</i>    | ENSMUSG00000022957 | -0.561348339 | 0.007845479 |
| <i>Hlcs</i>     | ENSMUSG00000040820 | -0.979200647 | 0.007858749 |
| <i>Fbxo16</i>   | ENSMUSG00000034532 | -3.128797365 | 0.007880314 |
| <i>Nmnat3</i>   | ENSMUSG00000032456 | -0.680937592 | 0.007880314 |
| <i>Uso1</i>     | ENSMUSG00000029407 | 0.620070772  | 0.007881238 |
| <i>Smc4</i>     | ENSMUSG00000034349 | 0.60868852   | 0.00790911  |
| <i>Hfe</i>      | ENSMUSG00000006611 | -0.548736197 | 0.007921432 |
| <i>Coq8b</i>    | ENSMUSG00000003762 | 0.900183849  | 0.007925972 |
| <i>Pole4</i>    | ENSMUSG00000030042 | 0.586361933  | 0.007925972 |
| <i>Rpl39</i>    | ENSMUSG00000079641 | 0.847394879  | 0.007935236 |
| <i>Kdm6b</i>    | ENSMUSG00000018476 | -0.847106096 | 0.007943398 |
| <i>Casp12</i>   | ENSMUSG00000025887 | 0.695840337  | 0.007964554 |
| <i>Plscr5</i>   | ENSMUSG00000095654 | -2.060379411 | 0.007974473 |
| <i>Sae1</i>     | ENSMUSG00000052833 | 0.557794673  | 0.007980153 |
| <i>Lrp3</i>     | ENSMUSG00000001802 | -0.888254971 | 0.007991693 |



|                      |                    |              |             |
|----------------------|--------------------|--------------|-------------|
| <i>Gm5737</i>        | ENSMUSG00000109392 | -4.397609163 | 0.008020452 |
| <i>Mlf1</i>          | ENSMUSG00000048416 | -0.751969723 | 0.008026473 |
| <i>Dnttip2</i>       | ENSMUSG00000039756 | 0.535484146  | 0.008038574 |
| <i>Gm13375</i>       | ENSMUSG00000075514 | -0.676109935 | 0.008046954 |
| <i>Lgals4</i>        | ENSMUSG00000053964 | -1.510505434 | 0.008109252 |
| <i>Fam210a</i>       | ENSMUSG00000038121 | -0.599978989 | 0.008126414 |
| <i>Rhd</i>           | ENSMUSG00000028825 | -1.058202744 | 0.00813311  |
| <i>Egf</i>           | ENSMUSG00000028017 | -1.767300999 | 0.008151352 |
| <i>Lxn</i>           | ENSMUSG00000047557 | 0.945288217  | 0.008173865 |
| <i>Casc1</i>         | ENSMUSG00000043541 | -1.225598151 | 0.00821081  |
| <i>Stil</i>          | ENSMUSG00000028718 | 3.132507319  | 0.008212463 |
| <i>Gm49492</i>       | ENSMUSG00000116180 | -1.787102868 | 0.008220275 |
| <i>Susd3</i>         | ENSMUSG00000021384 | 1.191916118  | 0.008220622 |
| <i>Copb1</i>         | ENSMUSG00000030754 | 0.537994042  | 0.008232922 |
| <i>Cyb5r2</i>        | ENSMUSG00000048065 | -1.425382972 | 0.008252817 |
| <i>Tmem182</i>       | ENSMUSG00000079588 | -0.590264636 | 0.008257782 |
| <i>Cdc42se1</i>      | ENSMUSG00000046722 | 0.612728375  | 0.008278635 |
| <i>Haus7</i>         | ENSMUSG00000031371 | 0.928029544  | 0.008278635 |
| <i>2610507I01Rik</i> | ENSMUSG00000085882 | -1.180864093 | 0.008284091 |
| <i>Hsd11b2</i>       | ENSMUSG00000031891 | 4.99318151   | 0.008293118 |
| <i>Fads6</i>         | ENSMUSG00000044788 | -1.420266117 | 0.008303683 |
| <i>Ncf4</i>          | ENSMUSG00000071715 | 1.191140578  | 0.008303683 |
| <i>Rpl11</i>         | ENSMUSG00000059291 | 0.620254404  | 0.008304136 |
| <i>Rad18</i>         | ENSMUSG00000030254 | 1.434610416  | 0.008304136 |
| <i>Tti1</i>          | ENSMUSG00000027650 | -0.80317612  | 0.008316248 |
| <i>Tbc1d15</i>       | ENSMUSG00000020130 | 0.618383416  | 0.008325909 |
| <i>Cdc42ep4</i>      | ENSMUSG00000041598 | 0.623742542  | 0.008344402 |
| <i>Dysf</i>          | ENSMUSG00000033788 | 0.570908635  | 0.008358044 |
| <i>Plexd2</i>        | ENSMUSG00000087141 | 3.980480796  | 0.008358044 |
| <i>Plp2</i>          | ENSMUSG00000031146 | 0.623606102  | 0.008370043 |
| <i>Gpatch1</i>       | ENSMUSG00000063808 | -0.809843174 | 0.008396537 |
| <i>Tnnt1</i>         | ENSMUSG00000064179 | -0.836070698 | 0.008476686 |
| <i>Tcap</i>          | ENSMUSG00000007877 | -0.84968708  | 0.008476686 |
| <i>Ska3</i>          | ENSMUSG00000021965 | 2.496386066  | 0.008508765 |
| <i>Pi16</i>          | ENSMUSG00000024011 | 0.635317467  | 0.008508765 |
| <i>Trip11</i>        | ENSMUSG00000021188 | -0.732418914 | 0.008508765 |
| <i>Zfp853</i>        | ENSMUSG00000093910 | 4.499180701  | 0.008508765 |
| <i>Hacd1</i>         | ENSMUSG00000063275 | 0.709243143  | 0.008517863 |
| <i>Polrmt</i>        | ENSMUSG00000020329 | -0.793966543 | 0.008538087 |
| <i>Fau</i>           | ENSMUSG00000038274 | 0.680705583  | 0.008542557 |

|                   |                    |              |             |
|-------------------|--------------------|--------------|-------------|
| <i>Ccdc186</i>    | ENSMUSG00000035173 | -0.715698622 | 0.008557453 |
| <i>Gch1</i>       | ENSMUSG00000037580 | 0.764716676  | 0.008557478 |
| <i>Rasd1</i>      | ENSMUSG00000049892 | 1.082805818  | 0.008602241 |
| <i>Ankrd50</i>    | ENSMUSG00000044864 | -0.726281866 | 0.008602241 |
| <i>Cfap36</i>     | ENSMUSG00000020462 | 0.650640427  | 0.008602241 |
| <i>Scpep1</i>     | ENSMUSG00000000278 | 0.631044442  | 0.008615239 |
| <i>Adgrl4</i>     | ENSMUSG00000039167 | 0.666800373  | 0.0086207   |
| <i>Rgs6</i>       | ENSMUSG00000021219 | -0.70589965  | 0.008623499 |
| <i>Ezr</i>        | ENSMUSG00000052397 | -0.619445651 | 0.008623499 |
| <i>Rps3a1</i>     | ENSMUSG00000028081 | 0.49793456   | 0.008635833 |
| <i>Mmaa</i>       | ENSMUSG00000037022 | -0.79524714  | 0.008672171 |
| <i>Epb41l2</i>    | ENSMUSG00000019978 | 0.55061916   | 0.008675349 |
| <i>Cdh4</i>       | ENSMUSG00000000305 | -2.074223957 | 0.008675349 |
| <i>Iqgap3</i>     | ENSMUSG00000028068 | 1.661132626  | 0.008688016 |
| <i>Reep3</i>      | ENSMUSG00000019873 | 0.556082207  | 0.008704622 |
| <i>Gpsm1</i>      | ENSMUSG00000026930 | -0.578296858 | 0.008704622 |
| <i>Prlr</i>       | ENSMUSG00000005268 | -1.931264226 | 0.008708811 |
| <i>Hmgcs2</i>     | ENSMUSG00000027875 | -0.903001809 | 0.008718107 |
| <i>Ppp1r37</i>    | ENSMUSG00000051403 | -0.543574055 | 0.008720453 |
| <i>Fkbp10</i>     | ENSMUSG00000001555 | 0.713755685  | 0.008750056 |
| <i>Rpl7a-ps5</i>  | ENSMUSG00000071052 | 0.765425687  | 0.008750599 |
| <i>Rpl35a-ps3</i> | ENSMUSG00000067575 | 1.372546671  | 0.00876124  |
| <i>Bcar1</i>      | ENSMUSG00000031955 | 0.724624253  | 0.008804775 |
| <i>Col6a6</i>     | ENSMUSG00000043719 | -1.129539993 | 0.008804775 |
| <i>Ash1l</i>      | ENSMUSG00000028053 | -0.639521284 | 0.008812579 |
| <i>Map1lc3b</i>   | ENSMUSG00000031812 | -0.477891511 | 0.008867501 |
| <i>Nme1</i>       | ENSMUSG00000037601 | 0.779072245  | 0.008867501 |
| <i>Upf2</i>       | ENSMUSG00000043241 | -0.685065662 | 0.008867501 |
| <i>Fgf14</i>      | ENSMUSG00000025551 | -1.293658407 | 0.00887678  |
| <i>Spsb4</i>      | ENSMUSG00000046997 | 1.001012892  | 0.008885544 |
| <i>Fastkd1</i>    | ENSMUSG00000027086 | -0.944568563 | 0.008902399 |
| <i>Sgcg</i>       | ENSMUSG00000035296 | -0.609292307 | 0.008906134 |
| <i>Hdgfl3</i>     | ENSMUSG00000025104 | 0.718825398  | 0.008952071 |
| <i>Eya2</i>       | ENSMUSG00000017897 | 1.130741574  | 0.008959559 |
| <i>Patj</i>       | ENSMUSG00000061859 | -0.798833003 | 0.008959559 |
| <i>Dtx3</i>       | ENSMUSG00000040415 | -0.695674165 | 0.008999033 |
| <i>Abcb10</i>     | ENSMUSG00000031974 | -0.6607203   | 0.009005326 |
| <i>Tsr3</i>       | ENSMUSG00000015126 | 0.761616804  | 0.009031746 |
| <i>Phkb</i>       | ENSMUSG00000036879 | -0.666272849 | 0.009072781 |
| <i>Gm12319</i>    | ENSMUSG00000087523 | -1.507576194 | 0.009073115 |

|                      |                    |              |             |
|----------------------|--------------------|--------------|-------------|
| <i>Snai1</i>         | ENSMUSG00000042821 | 1.084657589  | 0.009080675 |
| <i>Dapk2</i>         | ENSMUSG00000032380 | 0.968323123  | 0.009081549 |
| <i>Aprt</i>          | ENSMUSG00000006589 | 0.72026038   | 0.009081549 |
| <i>Creb3l2</i>       | ENSMUSG00000038648 | 0.684064209  | 0.00908389  |
| <i>Fam149b</i>       | ENSMUSG00000039599 | -0.575184073 | 0.009084984 |
| <i>Helt</i>          | ENSMUSG00000047171 | -2.163242154 | 0.009087124 |
| <i>Fam171a2</i>      | ENSMUSG00000034685 | 0.846246818  | 0.009102899 |
| <i>Anapc13</i>       | ENSMUSG00000035048 | -0.794861871 | 0.009134495 |
| <i>Pde1c</i>         | ENSMUSG00000004347 | -0.74469305  | 0.009134495 |
| <i>Rps6</i>          | ENSMUSG00000028495 | 0.545376481  | 0.009134495 |
| <i>Cyba</i>          | ENSMUSG00000006519 | 0.641681927  | 0.009135128 |
| <i>Arntl</i>         | ENSMUSG00000055116 | 1.378036396  | 0.009150136 |
| <i>Traf1</i>         | ENSMUSG00000026875 | 1.347455571  | 0.009160035 |
| <i>Gsdma</i>         | ENSMUSG00000017204 | 4.299761926  | 0.009169978 |
| <i>Stmn2</i>         | ENSMUSG00000027500 | 0.949316413  | 0.009221174 |
| <i>2610507B11Rik</i> | ENSMUSG00000010277 | -0.56803898  | 0.009238047 |
| <i>Lpgat1</i>        | ENSMUSG00000026623 | -0.577322441 | 0.009279194 |
| <i>Crybg3</i>        | ENSMUSG00000022723 | -0.838134053 | 0.009279194 |
| <i>Creld2</i>        | ENSMUSG00000023272 | 0.765664121  | 0.009286871 |
| <i>Gdf3</i>          | ENSMUSG00000030117 | 3.418499935  | 0.009329424 |
| <i>Cfdp1</i>         | ENSMUSG00000031954 | 0.534049786  | 0.009329424 |
| <i>Herc1</i>         | ENSMUSG00000038664 | -0.76643262  | 0.009345772 |
| <i>Arrb2</i>         | ENSMUSG00000060216 | 0.694587195  | 0.009357668 |
| <i>Hcn2</i>          | ENSMUSG00000020331 | -0.660345421 | 0.009368003 |
| <i>Elmod3</i>        | ENSMUSG00000056698 | -0.860717543 | 0.009377064 |
| <i>Tmem97</i>        | ENSMUSG00000037278 | 0.859635869  | 0.009377064 |
| <i>Rpl36a-ps2</i>    | ENSMUSG00000105388 | 0.831553752  | 0.009377064 |
| <i>Rpl6l</i>         | ENSMUSG00000091086 | 0.647396791  | 0.009377064 |
| <i>Gapdh</i>         | ENSMUSG00000057666 | 3.071091605  | 0.009393116 |
| <i>Ctnn</i>          | ENSMUSG00000031078 | 0.607938459  | 0.009397508 |
| <i>Notch4</i>        | ENSMUSG00000015468 | 0.711168677  | 0.009410009 |
| <i>Zfp72</i>         | ENSMUSG00000069184 | -1.255348835 | 0.009428662 |
| <i>Ssr4</i>          | ENSMUSG00000002014 | 0.603378951  | 0.00945193  |
| <i>Mnat1</i>         | ENSMUSG00000021103 | 0.623039554  | 0.009466068 |
| <i>Vars</i>          | ENSMUSG00000007029 | 0.654715186  | 0.009467672 |
| <i>Ptpn12</i>        | ENSMUSG00000028771 | 0.587670791  | 0.00947005  |
| <i>Apbb2</i>         | ENSMUSG00000029207 | -0.60023892  | 0.009480219 |
| <i>Gm5561</i>        | ENSMUSG00000096474 | 1.314334073  | 0.009480219 |
| <i>Socs2</i>         | ENSMUSG00000020027 | 0.551631762  | 0.009493536 |
| <i>Rnf114</i>        | ENSMUSG00000006418 | -0.53877324  | 0.009525274 |

|                      |                    |              |             |
|----------------------|--------------------|--------------|-------------|
| <i>Ptpn4</i>         | ENSMUSG00000026384 | -0.804830115 | 0.009528061 |
| <i>Mast2</i>         | ENSMUSG00000003810 | -0.5643655   | 0.009534818 |
| <i>Gm29237</i>       | ENSMUSG00000101872 | -2.588333051 | 0.009534818 |
| <i>Tufm</i>          | ENSMUSG00000073838 | -0.558892253 | 0.009536719 |
| <i>2700099C18Rik</i> | ENSMUSG00000098090 | 2.368774376  | 0.00954619  |
| <i>Reep5</i>         | ENSMUSG00000005873 | -0.569263077 | 0.009549779 |
| <i>Med11</i>         | ENSMUSG00000018923 | 0.75424349   | 0.009566049 |
| <i>Ccdc85b</i>       | ENSMUSG00000095098 | 0.645734035  | 0.009584662 |
| <i>Amacr</i>         | ENSMUSG00000022244 | -0.775565774 | 0.009597114 |
| <i>Ppfibp2</i>       | ENSMUSG00000036528 | -0.80613166  | 0.009634554 |
| <i>Ptk2</i>          | ENSMUSG00000022607 | 0.584125983  | 0.009671233 |
| <i>Zfp60</i>         | ENSMUSG00000037640 | -0.922995974 | 0.009676799 |
| <i>Layn</i>          | ENSMUSG00000060594 | 0.861724958  | 0.009684041 |
| <i>Crip2</i>         | ENSMUSG00000006356 | -0.509319055 | 0.009714029 |
| <i>Smarca1</i>       | ENSMUSG00000031099 | 1.349475669  | 0.009727626 |
| <i>Kmt2a</i>         | ENSMUSG00000002028 | -0.789918291 | 0.009753938 |
| <i>Snx8</i>          | ENSMUSG00000029560 | 0.618682829  | 0.009766518 |
| <i>Dkk3</i>          | ENSMUSG00000030772 | 0.954257063  | 0.009774196 |
| <i>Lpar4</i>         | ENSMUSG00000049929 | 1.198728282  | 0.009824801 |
| <i>Tmem120a</i>      | ENSMUSG00000039886 | 0.579044845  | 0.009836268 |
| <i>Cyb5d1</i>        | ENSMUSG00000044795 | -0.892590884 | 0.00990431  |
| <i>Gfm1</i>          | ENSMUSG00000027774 | -0.601757234 | 0.009906885 |
| <i>Crk</i>           | ENSMUSG00000017776 | 0.499000296  | 0.009912078 |
| <i>Gm20686</i>       | ENSMUSG00000093697 | -3.939289842 | 0.00991658  |
| <i>Dnajc27</i>       | ENSMUSG00000020657 | -0.786899186 | 0.009922345 |
| <i>Sgol</i>          | ENSMUSG00000023940 | 2.672451289  | 0.009940092 |
| <i>2900097C17Rik</i> | ENSMUSG00000102869 | -0.534828278 | 0.009940092 |
| <i>Clec12a</i>       | ENSMUSG00000053063 | 0.842297312  | 0.009940092 |
| <i>Prpf19</i>        | ENSMUSG00000024735 | -0.550661197 | 0.009940092 |
| <i>Stx8</i>          | ENSMUSG00000020903 | 0.52425139   | 0.009969147 |
| <i>Hs1bp3</i>        | ENSMUSG00000020605 | -0.82646845  | 0.009969147 |
| <i>Anxa11</i>        | ENSMUSG00000021866 | -0.683688217 | 0.010028071 |
| <i>Patz1</i>         | ENSMUSG00000020453 | -0.778268055 | 0.010036558 |
| <i>Gm37691</i>       | ENSMUSG00000104348 | -1.548124721 | 0.010049973 |
| <i>Fam83d</i>        | ENSMUSG00000027654 | 2.053687468  | 0.010061126 |
| <i>Gm9531</i>        | ENSMUSG00000079225 | 0.867460756  | 0.010094923 |
| <i>Frmd8</i>         | ENSMUSG00000024816 | 0.725280483  | 0.010094923 |
| <i>Ube2d1</i>        | ENSMUSG00000019927 | -0.710000879 | 0.01011148  |
| <i>Lyn</i>           | ENSMUSG00000042228 | 0.659275545  | 0.010120011 |
| <i>Itpr3</i>         | ENSMUSG00000042644 | -0.873718759 | 0.010122545 |

|                      |                    |              |             |
|----------------------|--------------------|--------------|-------------|
| <i>Slc15a3</i>       | ENSMUSG00000024737 | 1.227931365  | 0.010122545 |
| <i>Tnfrsf1a</i>      | ENSMUSG00000030341 | 0.530148711  | 0.010167807 |
| <i>Slc41a3</i>       | ENSMUSG00000030089 | -0.841083342 | 0.010252825 |
| <i>Ctxn3</i>         | ENSMUSG00000069372 | 3.183677987  | 0.01025811  |
| <i>Flnc</i>          | ENSMUSG00000068699 | 0.805276401  | 0.010376386 |
| <i>mt-Tq</i>         | ENSMUSG00000064343 | -2.665554295 | 0.010376386 |
| <i>Shmt1</i>         | ENSMUSG00000020534 | -0.961626012 | 0.010417883 |
| <i>Gm6863</i>        | ENSMUSG00000043483 | 0.542368134  | 0.010442952 |
| <i>Mas1</i>          | ENSMUSG00000068037 | -5.48081932  | 0.010540626 |
| <i>Nasp</i>          | ENSMUSG00000028693 | 0.646501548  | 0.010545758 |
| <i>Twnk</i>          | ENSMUSG00000025209 | -0.780025691 | 0.010554881 |
| <i>Gm8121</i>        | ENSMUSG00000051116 | -0.674346356 | 0.010554881 |
| <i>Nmt1</i>          | ENSMUSG00000020936 | 0.590173246  | 0.010561467 |
| <i>Actr10</i>        | ENSMUSG00000021076 | 0.506025669  | 0.010571694 |
| <i>Eif4ebp2</i>      | ENSMUSG00000020091 | -0.569173328 | 0.010585245 |
| <i>Psmc6</i>         | ENSMUSG00000021024 | 0.453718657  | 0.010600171 |
| <i>Foxj2</i>         | ENSMUSG00000003154 | -0.796344693 | 0.010630874 |
| <i>Gm17281</i>       | ENSMUSG00000097317 | -0.957411804 | 0.010645179 |
| <i>Zfp882</i>        | ENSMUSG00000089857 | -1.929183541 | 0.010659712 |
| <i>Parp14</i>        | ENSMUSG00000034422 | -0.823658221 | 0.010707218 |
| <i>Gng8</i>          | ENSMUSG00000063594 | 1.6902114    | 0.010728898 |
| <i>Gm15867</i>       | ENSMUSG00000089812 | 2.29453087   | 0.010728989 |
| <i>Jup</i>           | ENSMUSG00000001552 | -0.504654568 | 0.010770133 |
| <i>Nop9</i>          | ENSMUSG00000019297 | 0.621530744  | 0.010808174 |
| <i>Rab6b</i>         | ENSMUSG00000032549 | -0.770090323 | 0.010813862 |
| <i>Gstz1</i>         | ENSMUSG00000021033 | -0.598636697 | 0.01084322  |
| <i>Ppme1</i>         | ENSMUSG00000030718 | 0.590450913  | 0.010852693 |
| <i>Lonp1</i>         | ENSMUSG00000041168 | 0.51127531   | 0.010882648 |
| <i>Gprc5c</i>        | ENSMUSG00000051043 | -1.194071977 | 0.010902978 |
| <i>Slc4a3</i>        | ENSMUSG00000006576 | -0.701147472 | 0.010930687 |
| <i>Kat6a</i>         | ENSMUSG00000031540 | -0.740374334 | 0.010930687 |
| <i>Klf4</i>          | ENSMUSG00000003032 | 0.618144203  | 0.010938591 |
| <i>Lck</i>           | ENSMUSG00000000409 | 1.925779723  | 0.010965329 |
| <i>2010204K13Rik</i> | ENSMUSG00000063018 | 2.093498601  | 0.010988309 |
| <i>Stard3</i>        | ENSMUSG00000018167 | -0.737176621 | 0.011007676 |
| <i>Tmprss6</i>       | ENSMUSG00000016942 | 3.182307242  | 0.011016627 |
| <i>Col5a3</i>        | ENSMUSG00000004098 | 1.072786357  | 0.011032852 |
| <i>Gm30970</i>       | ENSMUSG00000115637 | -1.537532722 | 0.011043809 |
| <i>Aco2</i>          | ENSMUSG00000022477 | 0.714291863  | 0.011043809 |
| <i>Illrn</i>         | ENSMUSG00000026981 | 1.774393424  | 0.011043809 |

|                      |                    |              |             |
|----------------------|--------------------|--------------|-------------|
| <i>Rps23</i>         | ENSMUSG00000049517 | 0.607864705  | 0.011044429 |
| <i>S100a13</i>       | ENSMUSG00000042312 | 0.7287771    | 0.011051487 |
| <i>Ggh</i>           | ENSMUSG00000073987 | 0.596497851  | 0.011070018 |
| <i>Ndufa4</i>        | ENSMUSG00000029632 | -0.521492113 | 0.011077447 |
| <i>Dnaja4</i>        | ENSMUSG00000032285 | 0.626902102  | 0.0111002   |
| <i>Hemk1</i>         | ENSMUSG00000032579 | -0.739317733 | 0.011104444 |
| <i>Rragb</i>         | ENSMUSG00000041658 | -1.311674191 | 0.011132751 |
| <i>Hrc</i>           | ENSMUSG00000038239 | -1.421097408 | 0.011165052 |
| <i>Rpl31-ps8</i>     | ENSMUSG00000067870 | 0.649223853  | 0.011177048 |
| <i>Snhg5</i>         | ENSMUSG00000097195 | 0.981175357  | 0.011177048 |
| <i>2810414N06Rik</i> | ENSMUSG00000100594 | -1.303053423 | 0.011200824 |
| <i>Phf2</i>          | ENSMUSG00000038025 | -0.605343721 | 0.011212399 |
| <i>Pdlim4</i>        | ENSMUSG00000020388 | -0.743564211 | 0.011212399 |
| <i>Gm36535</i>       | ENSMUSG00000105376 | -2.002581668 | 0.01124555  |
| <i>Akr1b7</i>        | ENSMUSG00000052131 | 4.854947638  | 0.01124555  |
| <i>Cited4</i>        | ENSMUSG00000070803 | -0.915637934 | 0.011253223 |
| <i>Bdnf</i>          | ENSMUSG00000048482 | 0.813513307  | 0.011257432 |
| <i>Dpy19l1</i>       | ENSMUSG00000043067 | 0.677940352  | 0.01125871  |
| <i>Zfp612</i>        | ENSMUSG00000044676 | -1.346529533 | 0.011271777 |
| <i>Grhpr</i>         | ENSMUSG00000035637 | 0.525760067  | 0.011271777 |
| <i>Gm4535</i>        | ENSMUSG00000091083 | -1.069334578 | 0.011311    |
| <i>Kiz</i>           | ENSMUSG00000074749 | -0.619409365 | 0.011321045 |
| <i>Sirt7</i>         | ENSMUSG00000025138 | 0.738851478  | 0.011329355 |
| <i>Tedc1</i>         | ENSMUSG00000037466 | 1.93204317   | 0.011332337 |
| <i>Lrch2</i>         | ENSMUSG00000031290 | 1.113429749  | 0.011340407 |
| <i>Rgn</i>           | ENSMUSG00000023070 | -3.601907001 | 0.011377783 |
| <i>Msx1</i>          | ENSMUSG00000048450 | 0.958450254  | 0.011377783 |
| <i>Mgat5b</i>        | ENSMUSG00000043857 | 2.849170197  | 0.01140042  |
| <i>Npl</i>           | ENSMUSG00000042684 | 1.150731047  | 0.011411164 |
| <i>Dok5</i>          | ENSMUSG00000027560 | 2.059625266  | 0.011411164 |
| <i>Slc30a4</i>       | ENSMUSG00000005802 | 0.690799458  | 0.011431654 |
| <i>Mdk</i>           | ENSMUSG00000027239 | 1.081966679  | 0.011434555 |
| <i>Bnc1</i>          | ENSMUSG00000025105 | -1.7428373   | 0.011466622 |
| <i>Rps16</i>         | ENSMUSG00000037563 | 0.647374196  | 0.011466663 |
| <i>Inpp5d</i>        | ENSMUSG00000026288 | 0.695887706  | 0.011472127 |
| <i>Agtpbp1</i>       | ENSMUSG00000021557 | -0.677820457 | 0.011564325 |
| <i>Bcl10</i>         | ENSMUSG00000028191 | 0.587200494  | 0.011583854 |
| <i>Fcgr1</i>         | ENSMUSG00000015947 | 0.829592547  | 0.011603815 |
| <i>Tmem9b</i>        | ENSMUSG00000031021 | 0.531068824  | 0.011636728 |
| <i>Gm12519</i>       | ENSMUSG00000085643 | -1.782458867 | 0.011685549 |

|                    |                    |              |             |
|--------------------|--------------------|--------------|-------------|
| <i>Marf1</i>       | ENSMUSG00000060657 | -0.593291904 | 0.011715283 |
| <i>Mto1</i>        | ENSMUSG00000032342 | -0.709057292 | 0.011782776 |
| <i>Angpt4</i>      | ENSMUSG00000027460 | 2.299864425  | 0.011793741 |
| <i>Fkbp1a</i>      | ENSMUSG00000032966 | 0.534103143  | 0.011846852 |
| <i>Plet1os</i>     | ENSMUSG00000101304 | -1.07512694  | 0.011864864 |
| <i>Clca3a2</i>     | ENSMUSG00000028262 | -5.449180216 | 0.011903743 |
| <i>Pard6g</i>      | ENSMUSG00000056214 | 0.837234565  | 0.01200697  |
| <i>Drd2</i>        | ENSMUSG00000032259 | -0.99989717  | 0.01200697  |
| <i>Tusc3</i>       | ENSMUSG00000039530 | 0.524736787  | 0.01200697  |
| <i>Vegfd</i>       | ENSMUSG00000031380 | 0.890331757  | 0.012009954 |
| <i>Kcnd3</i>       | ENSMUSG00000040896 | -1.165239379 | 0.012012324 |
| <i>Nt5dc3</i>      | ENSMUSG00000054027 | -0.626447113 | 0.01209899  |
| <i>Gm2830</i>      | ENSMUSG00000086567 | 1.272561757  | 0.012101074 |
| <i>Acpl</i>        | ENSMUSG00000044573 | 0.566124165  | 0.012122202 |
| <i>Calr3</i>       | ENSMUSG00000019732 | -0.776211081 | 0.012122202 |
| <i>Neil3</i>       | ENSMUSG00000039396 | 2.627330438  | 0.012122202 |
| <i>Zkscan7</i>     | ENSMUSG00000063488 | -1.589192604 | 0.012193674 |
| <i>Fam180a</i>     | ENSMUSG00000047420 | 1.484631294  | 0.012245036 |
| <i>Ext1</i>        | ENSMUSG00000061731 | 0.681617208  | 0.012370598 |
| <i>Pafah2</i>      | ENSMUSG00000037366 | -0.80622513  | 0.012386112 |
| <i>Crabp2</i>      | ENSMUSG00000004885 | 5.465431513  | 0.012392815 |
| <i>Lonrf1</i>      | ENSMUSG00000039633 | -0.866953487 | 0.012437562 |
| <i>Coa5</i>        | ENSMUSG00000026112 | -0.509047155 | 0.012442016 |
| <i>Gm31812</i>     | ENSMUSG00000109599 | -3.525425546 | 0.012442741 |
| <i>Gm6136</i>      | ENSMUSG00000084106 | 0.655878132  | 0.012465006 |
| <i>Tmx4</i>        | ENSMUSG00000034723 | -0.541527455 | 0.012491903 |
| <i>AW549877</i>    | ENSMUSG00000041935 | -0.609059169 | 0.012505723 |
| <i>Tslrn1</i>      | ENSMUSG00000085757 | 5.32565765   | 0.012571012 |
| <i>Nus1</i>        | ENSMUSG00000023068 | 0.509586631  | 0.012573524 |
| <i>D5Erttd579e</i> | ENSMUSG00000029190 | -0.56833944  | 0.012597543 |
| <i>Cdon</i>        | ENSMUSG00000038119 | -0.950066069 | 0.012701463 |
| <i>AU020206</i>    | ENSMUSG00000097415 | -0.924163151 | 0.012701463 |
| <i>Fzd1</i>        | ENSMUSG00000044674 | 0.824452665  | 0.012701654 |
| <i>Iscu</i>        | ENSMUSG00000025825 | -0.683793633 | 0.01276278  |
| <i>Epm2aip1</i>    | ENSMUSG00000046785 | -0.699960344 | 0.012817778 |
| <i>Egln2</i>       | ENSMUSG00000058709 | 0.5384327    | 0.012843871 |
| <i>Gtf2h1</i>      | ENSMUSG00000006599 | 0.613680154  | 0.012898992 |
| <i>mt-Nd6</i>      | ENSMUSG00000064368 | -0.77197703  | 0.01295663  |
| <i>Rfc2</i>        | ENSMUSG00000023104 | 0.586194619  | 0.012963808 |
| <i>Prrc2a</i>      | ENSMUSG00000024393 | -0.529857808 | 0.012991531 |

|                      |                    |              |             |
|----------------------|--------------------|--------------|-------------|
| <i>Ssb</i>           | ENSMUSG00000068882 | 0.498270702  | 0.013040856 |
| <i>Lclat1</i>        | ENSMUSG00000054469 | -0.692110274 | 0.013040856 |
| <i>Perm1</i>         | ENSMUSG00000078486 | -0.720772775 | 0.013040856 |
| <i>Poldip2</i>       | ENSMUSG00000001100 | -0.475743305 | 0.013049986 |
| <i>Pdzd4</i>         | ENSMUSG00000002006 | 1.044226812  | 0.013049986 |
| <i>Mpdz</i>          | ENSMUSG00000028402 | -0.55152323  | 0.013052078 |
| <i>Shld1</i>         | ENSMUSG00000044991 | -0.855437367 | 0.013104694 |
| <i>Bnip3l</i>        | ENSMUSG00000022051 | 0.589919438  | 0.013143488 |
| <i>Nop56</i>         | ENSMUSG00000027405 | 0.600483537  | 0.013151695 |
| <i>Sqle</i>          | ENSMUSG00000022351 | 1.402944052  | 0.013177806 |
| <i>Rhod</i>          | ENSMUSG00000041845 | 0.79599584   | 0.013186175 |
| <i>Tns1</i>          | ENSMUSG00000055322 | -0.681358486 | 0.013186175 |
| <i>Cybrd1</i>        | ENSMUSG00000027015 | -1.449294935 | 0.013204478 |
| <i>Slc26a3</i>       | ENSMUSG00000001225 | -1.400327891 | 0.013211133 |
| <i>Mavs</i>          | ENSMUSG00000037523 | -0.525543094 | 0.013214717 |
| <i>Cd84</i>          | ENSMUSG00000038147 | 0.910190927  | 0.013246971 |
| <i>Dcun1d3</i>       | ENSMUSG00000048787 | 0.731630703  | 0.013274392 |
| <i>Abcg2</i>         | ENSMUSG00000029802 | 0.599957386  | 0.01328644  |
| <i>Pld3</i>          | ENSMUSG00000003363 | 0.570246769  | 0.013300273 |
| <i>Tmem179</i>       | ENSMUSG00000054013 | -2.110492839 | 0.013321642 |
| <i>AC121151.1</i>    | ENSMUSG00000116757 | 1.020907512  | 0.013323432 |
| <i>Impdh2</i>        | ENSMUSG00000062867 | 0.534387302  | 0.013348264 |
| <i>P4htm</i>         | ENSMUSG00000006675 | -0.744827741 | 0.013368888 |
| <i>Xirp1</i>         | ENSMUSG00000079243 | 0.763370136  | 0.013368888 |
| <i>Stat5b</i>        | ENSMUSG00000020919 | -0.56692601  | 0.013466352 |
| <i>Cd40</i>          | ENSMUSG00000017652 | 0.956758307  | 0.013466352 |
| <i>Ccnd1</i>         | ENSMUSG00000070348 | 0.654621634  | 0.013485792 |
| <i>Ehd2</i>          | ENSMUSG00000074364 | 0.50642434   | 0.013502987 |
| <i>Ufsp2</i>         | ENSMUSG00000031634 | 0.672040193  | 0.013517345 |
| <i>Ap2m1</i>         | ENSMUSG00000022841 | 0.447510191  | 0.013517571 |
| <i>Abr</i>           | ENSMUSG00000017631 | -0.664418679 | 0.01357182  |
| <i>Cd274</i>         | ENSMUSG00000016496 | -1.129978491 | 0.013581736 |
| <i>Gm3788</i>        | ENSMUSG00000094392 | 0.988382833  | 0.013613992 |
| <i>Rassf10</i>       | ENSMUSG00000098132 | -1.171134035 | 0.013630107 |
| <i>Gstol</i>         | ENSMUSG00000025068 | 0.476367267  | 0.013779849 |
| <i>Selenom</i>       | ENSMUSG00000075702 | 0.669865295  | 0.013785431 |
| <i>Gm10736</i>       | ENSMUSG00000096842 | -1.726579147 | 0.013785431 |
| <i>E230013L22Rik</i> | ENSMUSG00000096957 | 1.043416944  | 0.013785674 |
| <i>Naa40</i>         | ENSMUSG00000024764 | -0.764044753 | 0.013791287 |
| <i>Arhgap15</i>      | ENSMUSG00000049744 | 0.991496301  | 0.013791287 |



|                      |                    |              |             |
|----------------------|--------------------|--------------|-------------|
| <i>1110008L16Rik</i> | ENSMUSG00000021023 | -0.846875554 | 0.013796844 |
| <i>Ephx3</i>         | ENSMUSG00000037577 | 2.191191124  | 0.01379794  |
| <i>Gm19461</i>       | ENSMUSG00000101693 | -1.174558576 | 0.01379794  |
| <i>Gng12</i>         | ENSMUSG00000036402 | 0.562711947  | 0.013802787 |
| <i>Gm7694</i>        | ENSMUSG00000102752 | -1.004194422 | 0.013818029 |
| <i>Frs3</i>          | ENSMUSG00000023266 | -1.098476516 | 0.013818029 |
| <i>Smim26</i>        | ENSMUSG00000074754 | -0.619326246 | 0.013832465 |
| <i>Vamp2</i>         | ENSMUSG00000020894 | -0.520954137 | 0.013864117 |
| <i>9030619P08Rik</i> | ENSMUSG00000053168 | -5.338897351 | 0.013867641 |
| <i>Tm6sf1</i>        | ENSMUSG00000038623 | 0.870835676  | 0.013876511 |
| <i>Adgr12</i>        | ENSMUSG00000028184 | -0.75702797  | 0.013878586 |
| <i>Kras</i>          | ENSMUSG00000030265 | 0.516596523  | 0.013883792 |
| <i>Cep83os</i>       | ENSMUSG00000097164 | -0.969707793 | 0.013883792 |
| <i>Gm5905</i>        | ENSMUSG00000110275 | 1.318215167  | 0.013883792 |
| <i>Fbxl15</i>        | ENSMUSG00000025226 | 0.772974765  | 0.013916139 |
| <i>Gm33543</i>       | ENSMUSG00000110353 | -1.592004081 | 0.013942298 |
| <i>Tmem82</i>        | ENSMUSG00000043085 | -1.132210157 | 0.013965266 |
| <i>Dlg4</i>          | ENSMUSG00000020886 | 0.886120677  | 0.014044578 |
| <i>Gpr65</i>         | ENSMUSG00000021886 | 1.093398682  | 0.014044578 |
| <i>Nifk</i>          | ENSMUSG00000026377 | 0.591523647  | 0.014068635 |
| <i>Taf4</i>          | ENSMUSG00000039117 | -0.764865577 | 0.01407453  |
| <i>Mrps21</i>        | ENSMUSG00000054312 | -0.663096357 | 0.014085962 |
| <i>Ano4</i>          | ENSMUSG00000035189 | -1.186561995 | 0.014148984 |
| <i>Six4</i>          | ENSMUSG00000034460 | -1.537256963 | 0.01417449  |
| <i>Vps13d</i>        | ENSMUSG00000020220 | -0.748983052 | 0.01417449  |
| <i>Rpl9-ps6</i>      | ENSMUSG00000062456 | 0.696996082  | 0.014190401 |
| <i>Tmem266</i>       | ENSMUSG00000032313 | -1.195959284 | 0.014211673 |
| <i>Vps13c</i>        | ENSMUSG00000035284 | -0.917417258 | 0.014244741 |
| <i>Dcaf13</i>        | ENSMUSG00000022300 | 0.576209713  | 0.014251567 |
| <i>Atp8b1</i>        | ENSMUSG00000039529 | 0.830643407  | 0.014277635 |
| <i>Psemb6</i>        | ENSMUSG00000018286 | 0.439619192  | 0.014296599 |
| <i>Ldb3</i>          | ENSMUSG00000021798 | -0.568792464 | 0.014399689 |
| <i>Slc16a8</i>       | ENSMUSG00000032988 | -2.157957347 | 0.014399689 |
| <i>Eif3i</i>         | ENSMUSG00000028798 | 0.467703319  | 0.014399689 |
| <i>Ppp2r2d</i>       | ENSMUSG00000041769 | 0.526156092  | 0.014399689 |
| <i>Mnt</i>           | ENSMUSG00000000282 | -0.788556945 | 0.014400875 |
| <i>Des</i>           | ENSMUSG00000026208 | 0.722681772  | 0.014412296 |
| <i>Rps24</i>         | ENSMUSG00000025290 | 0.535793693  | 0.014430461 |
| <i>Rab11fip2</i>     | ENSMUSG00000040022 | -1.075169923 | 0.014431713 |
| <i>Dusp4</i>         | ENSMUSG00000031530 | 1.777629123  | 0.01445407  |

|                      |                    |              |             |
|----------------------|--------------------|--------------|-------------|
| <i>Ypel3</i>         | ENSMUSG00000042675 | -0.654458986 | 0.014459537 |
| <i>Trim16</i>        | ENSMUSG00000047821 | 0.9126025    | 0.014491864 |
| <i>Gjc2</i>          | ENSMUSG00000043448 | 1.195131223  | 0.014541383 |
| <i>Itm2c</i>         | ENSMUSG00000026223 | 0.510197044  | 0.014541383 |
| <i>Sp140</i>         | ENSMUSG00000070031 | 0.90722411   | 0.014546701 |
| <i>Eif2s1</i>        | ENSMUSG00000021116 | 0.51935272   | 0.014546701 |
| <i>Txndc9</i>        | ENSMUSG00000058407 | 0.462247533  | 0.014562885 |
| <i>Cog5</i>          | ENSMUSG00000035933 | -0.677943078 | 0.014579233 |
| <i>Ehd4</i>          | ENSMUSG00000027293 | 0.609600582  | 0.014590295 |
| <i>Zbtb12</i>        | ENSMUSG00000049823 | -1.042647597 | 0.014590295 |
| <i>Akr1b3</i>        | ENSMUSG00000001642 | -0.54016347  | 0.0146273   |
| <i>Ank3</i>          | ENSMUSG00000069601 | -0.695642659 | 0.014664474 |
| <i>Ift74</i>         | ENSMUSG00000028576 | 0.767949113  | 0.014679706 |
| <i>Olfml2b</i>       | ENSMUSG00000038463 | 0.692753171  | 0.014682968 |
| <i>Gm28723</i>       | ENSMUSG00000101028 | 2.45001027   | 0.014751723 |
| <i>Btk</i>           | ENSMUSG00000016758 | -0.866141269 | 0.014751723 |
| <i>Ric8a</i>         | ENSMUSG00000025485 | 0.533945239  | 0.014755176 |
| <i>Gm44275</i>       | ENSMUSG00000107768 | 5.373598716  | 0.014786726 |
| <i>Gm9794</i>        | ENSMUSG00000107176 | 0.589111779  | 0.014809065 |
| <i>G2e3</i>          | ENSMUSG00000035293 | 1.020967984  | 0.014816326 |
| <i>Mapkapk3</i>      | ENSMUSG00000032577 | -0.577767232 | 0.014853899 |
| <i>Erc1</i>          | ENSMUSG00000030172 | -0.88001757  | 0.014879201 |
| <i>Cds2</i>          | ENSMUSG00000058793 | -0.510118938 | 0.014882102 |
| <i>Dnajc12</i>       | ENSMUSG00000036764 | -0.725821316 | 0.014911808 |
| <i>Thal</i>          | ENSMUSG00000017713 | -0.959901908 | 0.014926464 |
| <i>Il1rl2</i>        | ENSMUSG00000070942 | 1.058754011  | 0.014926464 |
| <i>Mfap3l</i>        | ENSMUSG00000031647 | -1.015688276 | 0.014959787 |
| <i>Atp5a1</i>        | ENSMUSG00000025428 | -0.489230624 | 0.014988632 |
| <i>2310016G11Rik</i> | ENSMUSG00000070574 | -1.8172025   | 0.014992325 |
| <i>Rab11fip3</i>     | ENSMUSG00000037098 | -0.728328789 | 0.015047239 |
| <i>Klf12</i>         | ENSMUSG00000072294 | -1.202355651 | 0.015112035 |
| <i>Sh3pxd2b</i>      | ENSMUSG00000040711 | 0.912645912  | 0.015130824 |
| <i>Tmem176b</i>      | ENSMUSG00000029810 | 0.547108323  | 0.015153793 |
| <i>Agl</i>           | ENSMUSG00000033400 | -0.635656449 | 0.015180422 |
| <i>Asap3</i>         | ENSMUSG00000036995 | -0.816558577 | 0.015201049 |
| <i>Maged2</i>        | ENSMUSG00000025268 | 0.570878889  | 0.015234495 |
| <i>Snx4</i>          | ENSMUSG00000022808 | 0.492949018  | 0.015234495 |
| <i>Gfra4</i>         | ENSMUSG00000027316 | -1.114706825 | 0.015251233 |
| <i>Col28a1</i>       | ENSMUSG00000068794 | 2.105620449  | 0.015274029 |
| <i>Ybey</i>          | ENSMUSG00000033126 | -1.117096697 | 0.015282099 |

|                      |                    |              |             |
|----------------------|--------------------|--------------|-------------|
| <i>Fam217b</i>       | ENSMUSG00000070476 | -0.838143511 | 0.015302054 |
| <i>Mlip</i>          | ENSMUSG00000032355 | -0.489957216 | 0.01533827  |
| <i>Asb16</i>         | ENSMUSG00000034768 | -1.835778406 | 0.015344888 |
| <i>Rad54l2</i>       | ENSMUSG00000040661 | -0.927120438 | 0.015352989 |
| <i>Mmrn1</i>         | ENSMUSG00000054641 | 0.839321471  | 0.015361881 |
| <i>Crebl2</i>        | ENSMUSG00000032652 | -0.684041701 | 0.01548668  |
| <i>2310009A05Rik</i> | ENSMUSG00000098332 | -0.903529191 | 0.015492181 |
| <i>Ace2</i>          | ENSMUSG00000015405 | 1.580279892  | 0.015516001 |
| <i>Cox6a1</i>        | ENSMUSG00000041697 | 0.553064145  | 0.015521989 |
| <i>Mmp2</i>          | ENSMUSG00000031740 | 0.535077914  | 0.015615136 |
| <i>1810059H22Rik</i> | ENSMUSG00000108207 | -2.069123743 | 0.015615136 |
| <i>Nbeal2</i>        | ENSMUSG00000056724 | -0.985621971 | 0.015616079 |
| <i>Coll1a1</i>       | ENSMUSG00000027966 | 4.707872349  | 0.015668151 |
| <i>Gm15772</i>       | ENSMUSG00000062353 | 0.557906091  | 0.015669459 |
| <i>Gm9118</i>        | ENSMUSG00000112825 | 1.112313546  | 0.015696564 |
| <i>D430042O09Rik</i> | ENSMUSG00000032743 | -0.890037704 | 0.015707226 |
| <i>Myl12a</i>        | ENSMUSG00000024048 | 0.604737514  | 0.015715875 |
| <i>Sun1</i>          | ENSMUSG00000036817 | -0.567679354 | 0.01573474  |
| <i>mt-Co2</i>        | ENSMUSG00000064354 | -1.495290365 | 0.015785082 |
| <i>Phyhip</i>        | ENSMUSG00000003469 | -0.806339135 | 0.015787882 |
| <i>Myo18b</i>        | ENSMUSG00000072720 | -0.734302274 | 0.015796617 |
| <i>Gm31663</i>       | ENSMUSG00000108994 | -1.11040021  | 0.01587821  |
| <i>Gtf2b</i>         | ENSMUSG00000028271 | 0.596839884  | 0.015909049 |
| <i>Gm7117</i>        | ENSMUSG00000063442 | -1.469039714 | 0.015967836 |
| <i>Pgk1-rs7</i>      | ENSMUSG00000066632 | 1.399125384  | 0.015999645 |
| <i>Gm14403</i>       | ENSMUSG00000094786 | -0.649392209 | 0.01606938  |
| <i>Coll3a1</i>       | ENSMUSG00000058806 | -1.384965582 | 0.016156032 |
| <i>Ube2i</i>         | ENSMUSG00000015120 | 0.475127948  | 0.016168276 |
| <i>Thap4</i>         | ENSMUSG00000026279 | -0.588999208 | 0.016174838 |
| <i>Dcaf11</i>        | ENSMUSG00000022214 | -0.553350525 | 0.016209288 |
| <i>Cystm1</i>        | ENSMUSG00000046727 | 0.550644219  | 0.016231255 |
| <i>Zfp710</i>        | ENSMUSG00000048897 | -0.644292009 | 0.016252598 |
| <i>Tex264</i>        | ENSMUSG00000040813 | 0.523866653  | 0.01625948  |
| <i>Cox17</i>         | ENSMUSG00000046516 | -1.779456331 | 0.016262625 |
| <i>Shox2</i>         | ENSMUSG00000027833 | 1.366471611  | 0.016262625 |
| <i>Sqstm1</i>        | ENSMUSG00000015837 | 0.53383403   | 0.01631448  |
| <i>Gm30459</i>       | ENSMUSG00000108468 | -2.395979273 | 0.016378489 |
| <i>Cela1</i>         | ENSMUSG00000023031 | 1.624391827  | 0.016378489 |
| <i>Snhg18</i>        | ENSMUSG00000096956 | 0.899681071  | 0.016447101 |
| <i>Sh2d1b1</i>       | ENSMUSG00000102418 | 2.089914068  | 0.016511975 |

|                  |                    |              |             |
|------------------|--------------------|--------------|-------------|
| <i>Gm14117</i>   | ENSMUSG00000042938 | -0.633173791 | 0.016511975 |
| <i>Lin52</i>     | ENSMUSG00000085793 | -0.92054589  | 0.016645284 |
| <i>Ptbp3</i>     | ENSMUSG00000028382 | 0.598098753  | 0.016675511 |
| <i>Slc27a3</i>   | ENSMUSG00000027932 | 1.611957483  | 0.016677552 |
| <i>Sema4d</i>    | ENSMUSG00000021451 | -0.64453875  | 0.016677552 |
| <i>Id4</i>       | ENSMUSG00000021379 | 1.788386644  | 0.016725445 |
| <i>Tnfaip8l2</i> | ENSMUSG00000013707 | 0.810042195  | 0.016742331 |
| <i>Tmod4</i>     | ENSMUSG00000005628 | -1.788618075 | 0.016790174 |
| <i>Plod1</i>     | ENSMUSG00000019055 | 0.56384585   | 0.016860362 |
| <i>Gab2</i>      | ENSMUSG00000004508 | 0.925338393  | 0.016936517 |
| <i>Dbp</i>       | ENSMUSG00000059824 | -0.840342614 | 0.017002878 |
| <i>Rpl18a</i>    | ENSMUSG00000045128 | 0.49867444   | 0.017046975 |
| <i>Zfp346</i>    | ENSMUSG00000021481 | -0.67081009  | 0.017046975 |
| <i>Leprot</i>    | ENSMUSG00000035212 | 0.549803733  | 0.017046975 |
| <i>Htatip2</i>   | ENSMUSG00000039745 | -0.712829226 | 0.017047963 |
| <i>Fgfr3</i>     | ENSMUSG00000054252 | 0.844713596  | 0.017075182 |
| <i>Psm14</i>     | ENSMUSG00000026914 | 0.490441358  | 0.017077361 |
| <i>Lpl</i>       | ENSMUSG00000015568 | -0.717118233 | 0.017084878 |
| <i>Sbk1</i>      | ENSMUSG00000042978 | -0.833603708 | 0.017085752 |
| <i>Gpatch4</i>   | ENSMUSG00000028069 | 0.714356703  | 0.017116907 |
| <i>Snx6</i>      | ENSMUSG00000005656 | 0.479911092  | 0.017172171 |
| <i>Mex3c</i>     | ENSMUSG00000037253 | 0.612565618  | 0.017194359 |
| <i>E2f6</i>      | ENSMUSG00000057469 | -0.589556644 | 0.017209204 |
| <i>Maoa</i>      | ENSMUSG00000025037 | 0.712475933  | 0.017213098 |
| <i>Pi4k2b</i>    | ENSMUSG00000029186 | 1.026097173  | 0.017228537 |
| <i>B4galt3</i>   | ENSMUSG00000052423 | -0.962031151 | 0.017228537 |
| <i>Sorcs2</i>    | ENSMUSG00000029093 | -1.216179505 | 0.017231846 |
| <i>Arap1</i>     | ENSMUSG00000032812 | 0.499827545  | 0.01723886  |
| <i>Psm7</i>      | ENSMUSG00000027566 | 0.438545605  | 0.017276984 |
| <i>Nanos1</i>    | ENSMUSG00000072437 | 1.85641845   | 0.017426212 |
| <i>Casq2</i>     | ENSMUSG00000027861 | -0.559251046 | 0.017444681 |
| <i>Cd3eap</i>    | ENSMUSG00000047649 | 0.608137346  | 0.01746734  |
| <i>Hspa5</i>     | ENSMUSG00000026864 | 0.552712588  | 0.017480701 |
| <i>Etv3</i>      | ENSMUSG00000003382 | -0.592624098 | 0.017532585 |
| <i>Bmp2k</i>     | ENSMUSG00000034663 | 0.723683643  | 0.017585856 |
| <i>Zfp609</i>    | ENSMUSG00000040524 | -0.849542992 | 0.017608322 |
| <i>Gm5532</i>    | ENSMUSG00000073535 | -0.854756466 | 0.017638334 |
| <i>Ptpn1</i>     | ENSMUSG00000027540 | 0.700240997  | 0.017639496 |
| <i>Rpl32</i>     | ENSMUSG00000057841 | 0.526271667  | 0.017647874 |
| <i>Ill1ra1</i>   | ENSMUSG00000073889 | 0.476998213  | 0.017666213 |

|                      |                    |              |             |
|----------------------|--------------------|--------------|-------------|
| <i>Blk</i>           | ENSMUSG00000014453 | 1.778247188  | 0.017670745 |
| <i>Prokr1</i>        | ENSMUSG00000049409 | -4.738149633 | 0.017678439 |
| <i>Usp24</i>         | ENSMUSG00000028514 | -0.572663738 | 0.017697764 |
| <i>Ivns1abp</i>      | ENSMUSG00000023150 | -0.595394894 | 0.017697764 |
| <i>Il3ra</i>         | ENSMUSG00000068758 | 0.830367269  | 0.017856799 |
| <i>Pycr2</i>         | ENSMUSG00000026520 | 0.640630992  | 0.017856835 |
| <i>Cd109</i>         | ENSMUSG00000046186 | 1.539221134  | 0.017859413 |
| <i>Cecr2</i>         | ENSMUSG00000071226 | -1.358510281 | 0.017862311 |
| <i>Rpf2</i>          | ENSMUSG00000038510 | 0.585739347  | 0.017924914 |
| <i>1700108F19Rik</i> | ENSMUSG00000101009 | -5.268918805 | 0.017931611 |
| <i>Cxcl10</i>        | ENSMUSG00000034855 | 1.721490783  | 0.017931611 |
| <i>Samd14</i>        | ENSMUSG00000047181 | 0.801800693  | 0.017939055 |
| <i>Dcaf1</i>         | ENSMUSG00000040325 | -0.678965294 | 0.017970999 |
| <i>Ccnjl</i>         | ENSMUSG00000044707 | -2.688047146 | 0.01800627  |
| <i>Fam135a</i>       | ENSMUSG00000026153 | -0.648957339 | 0.018068699 |
| <i>Rbms1</i>         | ENSMUSG00000026970 | 0.528116774  | 0.018102429 |
| <i>Sv2a</i>          | ENSMUSG00000038486 | -1.54138189  | 0.018127016 |
| <i>B330016D10Rik</i> | ENSMUSG00000048406 | -0.900875483 | 0.018170973 |
| <i>Chchd7</i>        | ENSMUSG00000042198 | -0.601708535 | 0.018204187 |
| <i>Gpd1l</i>         | ENSMUSG00000050627 | -0.539439466 | 0.018205128 |
| <i>Sumf1</i>         | ENSMUSG00000030101 | 0.599528364  | 0.018209434 |
| <i>Clmp</i>          | ENSMUSG00000032024 | 0.94002503   | 0.018216376 |
| <i>Kcnj15</i>        | ENSMUSG00000062609 | 1.867648635  | 0.018223794 |
| <i>Rab23</i>         | ENSMUSG00000004768 | 0.774615572  | 0.018266888 |
| <i>Pdss2</i>         | ENSMUSG00000038240 | -0.702725805 | 0.018298173 |
| <i>Gm34276</i>       | ENSMUSG00000113977 | -2.088649031 | 0.018329907 |
| <i>Gnmt</i>          | ENSMUSG00000002769 | -2.013718754 | 0.018329907 |
| <i>Tnfrsf19</i>      | ENSMUSG00000060548 | -1.435303488 | 0.018330416 |
| <i>Cox19</i>         | ENSMUSG00000045438 | 0.663442009  | 0.018334684 |
| <i>G0s2</i>          | ENSMUSG00000009633 | -0.832982269 | 0.018348758 |
| <i>Cox5a</i>         | ENSMUSG00000000088 | -0.529861212 | 0.018401927 |
| <i>Psmel</i>         | ENSMUSG00000022216 | -0.580476419 | 0.018413753 |
| <i>Hist1h4h</i>      | ENSMUSG00000060981 | -0.690850545 | 0.018551829 |
| <i>1810030O07Rik</i> | ENSMUSG00000044148 | -0.578918459 | 0.018556334 |
| <i>Ogt</i>           | ENSMUSG00000034160 | -0.654257973 | 0.018556334 |
| <i>Rspol</i>         | ENSMUSG00000028871 | -1.008546221 | 0.018584601 |
| <i>Tnfrsf18</i>      | ENSMUSG00000041954 | 2.904723999  | 0.018598648 |
| <i>Casp4</i>         | ENSMUSG00000033538 | 0.775824606  | 0.018631779 |
| <i>Rpl35a</i>        | ENSMUSG00000060636 | 0.646441442  | 0.018631779 |
| <i>Ctnna3</i>        | ENSMUSG00000060843 | -0.690375005 | 0.018632636 |

|                      |                    |              |             |
|----------------------|--------------------|--------------|-------------|
| <i>Fus</i>           | ENSMUSG00000030795 | -0.479880956 | 0.018640932 |
| <i>Stim2</i>         | ENSMUSG00000039156 | 0.621565688  | 0.018640932 |
| <i>Uqcrfs1</i>       | ENSMUSG00000038462 | -0.527589055 | 0.018716002 |
| <i>Rtf2</i>          | ENSMUSG00000027502 | 0.495506337  | 0.018719319 |
| <i>Mycbpap</i>       | ENSMUSG00000039110 | -4.176760037 | 0.018754133 |
| <i>Epsti1</i>        | ENSMUSG00000022014 | 0.780341954  | 0.018792856 |
| <i>Cdca5</i>         | ENSMUSG00000024791 | 2.030801842  | 0.018825942 |
| <i>Pla2g4e</i>       | ENSMUSG00000050211 | -1.523206165 | 0.018837268 |
| <i>Mplkip</i>        | ENSMUSG00000012429 | 0.670076537  | 0.01888976  |
| <i>Plxna4</i>        | ENSMUSG00000029765 | -0.825104321 | 0.018896993 |
| <i>Dync1li1</i>      | ENSMUSG00000032435 | 0.57382202   | 0.018896993 |
| <i>Cd68</i>          | ENSMUSG00000018774 | 0.597933955  | 0.018896993 |
| <i>Epb41</i>         | ENSMUSG00000028906 | -0.643193596 | 0.018924463 |
| <i>Gm43197</i>       | ENSMUSG00000107215 | -4.149179003 | 0.018951671 |
| <i>Cenpb</i>         | ENSMUSG00000068267 | 0.500353673  | 0.018960807 |
| <i>Pdzrn3</i>        | ENSMUSG00000035357 | 0.813123096  | 0.018967071 |
| <i>Stt3a</i>         | ENSMUSG00000032116 | 0.523310045  | 0.018967071 |
| <i>Man2a2</i>        | ENSMUSG00000038886 | -0.654844196 | 0.018982493 |
| <i>Efcab11</i>       | ENSMUSG00000021176 | 3.380684212  | 0.019072754 |
| <i>Nmt2</i>          | ENSMUSG00000026643 | 0.658957832  | 0.019162992 |
| <i>Ercc2</i>         | ENSMUSG00000030400 | -1.139930506 | 0.019162992 |
| <i>Btg3</i>          | ENSMUSG00000022863 | 0.751622528  | 0.019211724 |
| <i>Tmem150a</i>      | ENSMUSG00000055912 | -0.717572683 | 0.0192604   |
| <i>Gm45012</i>       | ENSMUSG00000109052 | -1.53959101  | 0.019270987 |
| <i>Mapk4</i>         | ENSMUSG00000024558 | 1.209881267  | 0.019270987 |
| <i>Cdk5rap3</i>      | ENSMUSG00000018669 | 0.537750378  | 0.019270987 |
| <i>Mars</i>          | ENSMUSG00000040354 | 0.655125805  | 0.019271312 |
| <i>Exosc2</i>        | ENSMUSG00000039356 | 0.74312354   | 0.019274988 |
| <i>Fbfl</i>          | ENSMUSG00000020776 | -0.752702457 | 0.019345626 |
| <i>Nt5c1a</i>        | ENSMUSG00000054958 | -1.648317781 | 0.019422057 |
| <i>Cbfb</i>          | ENSMUSG00000031885 | 0.493116901  | 0.0194352   |
| <i>Ubtcl1</i>        | ENSMUSG00000025171 | 0.630005473  | 0.0194352   |
| <i>Cpxm1</i>         | ENSMUSG00000027408 | 0.615223209  | 0.019461382 |
| <i>Atg2a</i>         | ENSMUSG00000024773 | -0.67820765  | 0.019507006 |
| <i>2-Mar</i>         | ENSMUSG00000073481 | 0.502060799  | 0.019507006 |
| <i>Pbdc1</i>         | ENSMUSG00000031226 | 0.715663882  | 0.0195319   |
| <i>3110053B16Rik</i> | ENSMUSG00000085642 | 2.21940867   | 0.019562021 |
| <i>Med25</i>         | ENSMUSG00000002968 | -0.508147468 | 0.019563878 |
| <i>Gm14267</i>       | ENSMUSG00000085682 | -1.02407734  | 0.019598065 |
| <i>Serpine2</i>      | ENSMUSG00000026249 | 0.525290517  | 0.019632817 |

|                      |                    |              |             |
|----------------------|--------------------|--------------|-------------|
| <i>1810055G02Rik</i> | ENSMUSG00000035372 | 0.773179822  | 0.019646084 |
| <i>Mtfr1</i>         | ENSMUSG00000027601 | -0.510986962 | 0.019695341 |
| <i>Ces2e</i>         | ENSMUSG00000031886 | 1.33516185   | 0.019736173 |
| <i>Zrsr2</i>         | ENSMUSG00000031370 | 0.682347107  | 0.019768074 |
| <i>Galnt16</i>       | ENSMUSG00000021130 | 0.887534373  | 0.019771189 |
| <i>Abca2</i>         | ENSMUSG00000026944 | -0.691502795 | 0.019771189 |
| <i>2310001H17Rik</i> | ENSMUSG00000097354 | -1.251036894 | 0.019771189 |
| <i>Acta1</i>         | ENSMUSG00000031972 | 1.393053999  | 0.019771189 |
| <i>Hdac1</i>         | ENSMUSG00000028800 | 0.565585981  | 0.019844605 |
| <i>P4ha2</i>         | ENSMUSG00000018906 | 0.573216656  | 0.019844605 |
| <i>Ccdc66</i>        | ENSMUSG00000046753 | -0.76781021  | 0.019844605 |
| <i>Clcn3</i>         | ENSMUSG00000004319 | -0.649908614 | 0.019877396 |
| <i>B3gnt7</i>        | ENSMUSG00000079445 | -2.335351006 | 0.019877396 |
| <i>Ezh1</i>          | ENSMUSG00000006920 | -0.548218277 | 0.019900156 |
| <i>Preli2</i>        | ENSMUSG00000056671 | 0.856340475  | 0.019913169 |
| <i>Masp1</i>         | ENSMUSG00000022887 | 0.840940292  | 0.019952719 |
| <i>Zfp775</i>        | ENSMUSG00000007216 | -0.653008984 | 0.019980255 |
| <i>Fstl3</i>         | ENSMUSG00000020325 | 1.295598584  | 0.019990659 |
| <i>Nlk</i>           | ENSMUSG00000017376 | -0.699853192 | 0.020037518 |
| <i>Myrip</i>         | ENSMUSG00000041794 | -0.794999156 | 0.020037518 |
| <i>Aigl</i>          | ENSMUSG00000019806 | -0.646656699 | 0.020037518 |
| <i>Acvr1b</i>        | ENSMUSG00000000532 | -0.725479534 | 0.020040142 |
| <i>Cand1</i>         | ENSMUSG00000020114 | 0.533390446  | 0.020064572 |
| <i>Cdc42ep5</i>      | ENSMUSG00000063838 | 0.830839983  | 0.020064572 |
| <i>Cript</i>         | ENSMUSG00000024146 | 0.489251302  | 0.020065565 |
| <i>Alyref</i>        | ENSMUSG00000025134 | 0.589246718  | 0.020127567 |
| <i>Spock2</i>        | ENSMUSG00000058297 | -0.649487833 | 0.02017356  |
| <i>4932438A13Rik</i> | ENSMUSG00000037270 | -0.6423629   | 0.02017356  |
| <i>Smad1</i>         | ENSMUSG00000031681 | 0.642956144  | 0.02017356  |
| <i>Fig4</i>          | ENSMUSG00000038417 | -0.560059697 | 0.020200013 |
| <i>Tmc7</i>          | ENSMUSG00000042246 | -1.147785466 | 0.020200013 |
| <i>Kctd1</i>         | ENSMUSG00000036225 | -0.744570196 | 0.020200013 |
| <i>Fosl2</i>         | ENSMUSG00000029135 | 0.775251065  | 0.020223366 |
| <i>Atp2a1</i>        | ENSMUSG00000030730 | -5.32407264  | 0.020240855 |
| <i>Kif16b</i>        | ENSMUSG00000038844 | -0.624737308 | 0.020240855 |
| <i>Tmem165</i>       | ENSMUSG00000029234 | 0.551258104  | 0.020267743 |
| <i>Polr1c</i>        | ENSMUSG00000067148 | 0.540417503  | 0.020343549 |
| <i>AC130815.1</i>    | ENSMUSG00000116617 | 1.725551424  | 0.020409886 |
| <i>Ankrd34a</i>      | ENSMUSG00000049097 | -1.846168323 | 0.020422593 |
| <i>Pigv</i>          | ENSMUSG00000043257 | -0.768918345 | 0.020497098 |

|                      |                    |              |             |
|----------------------|--------------------|--------------|-------------|
| <i>Clip2</i>         | ENSMUSG00000063146 | 0.649001249  | 0.020511987 |
| <i>Bcl11b</i>        | ENSMUSG00000048251 | -2.114210781 | 0.020554025 |
| <i>Stx17</i>         | ENSMUSG00000061455 | -0.559191581 | 0.020626785 |
| <i>Ddx3x</i>         | ENSMUSG00000000787 | 0.478179404  | 0.020626785 |
| <i>Srrm2</i>         | ENSMUSG00000039218 | -0.595769612 | 0.020651183 |
| <i>Extl3</i>         | ENSMUSG00000021978 | -0.614301689 | 0.020662215 |
| <i>Rin3</i>          | ENSMUSG00000044456 | 0.710666869  | 0.020806324 |
| <i>Rbbp4</i>         | ENSMUSG00000057236 | 0.455074062  | 0.020806324 |
| <i>Nudcd1</i>        | ENSMUSG00000038736 | 0.703984535  | 0.02086578  |
| <i>Irf2bp2</i>       | ENSMUSG00000051495 | 0.541430149  | 0.02086578  |
| <i>Sh3gl2</i>        | ENSMUSG00000028488 | -2.549497767 | 0.02087344  |
| <i>Smu1</i>          | ENSMUSG00000028409 | 0.482065388  | 0.020933599 |
| <i>Ptpn13</i>        | ENSMUSG00000034573 | -1.060121858 | 0.020948301 |
| <i>Prr5</i>          | ENSMUSG00000036106 | 0.859234488  | 0.02095039  |
| <i>Cpeb2</i>         | ENSMUSG00000039782 | -0.684771714 | 0.020952645 |
| <i>Serpina3n</i>     | ENSMUSG00000021091 | 1.632168083  | 0.020959048 |
| <i>Tldc1</i>         | ENSMUSG00000034105 | -0.664025504 | 0.020959048 |
| <i>Eif1ad</i>        | ENSMUSG00000024841 | 0.51950368   | 0.020960367 |
| <i>Cox4i2</i>        | ENSMUSG00000009876 | 0.892870687  | 0.020960367 |
| <i>Zmiz2</i>         | ENSMUSG00000041164 | -0.59652353  | 0.020960367 |
| <i>Gm6419</i>        | ENSMUSG00000072407 | -1.091893783 | 0.020970905 |
| <i>Ndufaf8</i>       | ENSMUSG00000078572 | -0.63919817  | 0.021008626 |
| <i>Atad2</i>         | ENSMUSG00000022360 | 0.920775727  | 0.021066506 |
| <i>Pxn</i>           | ENSMUSG00000029528 | 0.609226587  | 0.021066506 |
| <i>Dapk1</i>         | ENSMUSG00000021559 | -0.707263289 | 0.021134707 |
| <i>Gm16316</i>       | ENSMUSG00000087129 | -1.951004468 | 0.021134707 |
| <i>Slc33a1</i>       | ENSMUSG00000027822 | 0.640678611  | 0.021148429 |
| <i>Atxn7</i>         | ENSMUSG00000021738 | -0.711225414 | 0.021192976 |
| <i>Mrpl24</i>        | ENSMUSG00000019710 | 0.49459036   | 0.021192976 |
| <i>4921531C22Rik</i> | ENSMUSG00000085704 | -0.927045645 | 0.021196869 |
| <i>Camk2n2</i>       | ENSMUSG00000051146 | 1.279881399  | 0.021355963 |
| <i>Blvra</i>         | ENSMUSG00000001999 | 0.533429663  | 0.021379345 |
| <i>Klhl4</i>         | ENSMUSG00000025597 | 0.63738967   | 0.021401285 |
| <i>Ptpn18</i>        | ENSMUSG00000026126 | 0.985721117  | 0.02141458  |
| <i>Vamp3</i>         | ENSMUSG00000028955 | 0.489688389  | 0.021434657 |
| <i>Cfap43</i>        | ENSMUSG00000044948 | 0.807881024  | 0.021434657 |
| <i>Fndc3b</i>        | ENSMUSG00000039286 | 0.525443574  | 0.021450776 |
| <i>Acss3</i>         | ENSMUSG00000035948 | -2.100108737 | 0.021462512 |
| <i>Mrpl28</i>        | ENSMUSG00000024181 | -0.615345038 | 0.021493031 |
| <i>Tkl</i>           | ENSMUSG00000025574 | 1.160081308  | 0.021493031 |



|                      |                    |              |             |
|----------------------|--------------------|--------------|-------------|
| <i>Thyn1</i>         | ENSMUSG00000035443 | 0.546891455  | 0.021493031 |
| <i>Foxp2</i>         | ENSMUSG00000029563 | 0.909499701  | 0.021493031 |
| <i>Rnpep1l</i>       | ENSMUSG00000026269 | -0.543785238 | 0.021493031 |
| <i>Gm12346</i>       | ENSMUSG00000083899 | 1.233592889  | 0.021496796 |
| <i>Rell1</i>         | ENSMUSG00000047881 | 0.666577834  | 0.021512994 |
| <i>Slc7a6</i>        | ENSMUSG00000031904 | 0.805424979  | 0.021528116 |
| <i>Smad3</i>         | ENSMUSG00000032402 | -0.78474822  | 0.021534807 |
| <i>Setbp1</i>        | ENSMUSG00000024548 | -0.879992011 | 0.021624723 |
| <i>Cnih1</i>         | ENSMUSG00000015759 | 0.453717633  | 0.021671149 |
| <i>Chrm3</i>         | ENSMUSG00000046159 | -1.444725671 | 0.02167298  |
| <i>Gm12070</i>       | ENSMUSG00000069939 | 0.797548759  | 0.02167298  |
| <i>Coro2a</i>        | ENSMUSG00000028337 | 1.675723816  | 0.02167298  |
| <i>Hdc</i>           | ENSMUSG00000027360 | 1.04171626   | 0.021688965 |
| <i>Plxnb3</i>        | ENSMUSG00000031385 | -1.496805087 | 0.021688965 |
| <i>0610040B10Rik</i> | ENSMUSG00000089889 | -0.873942291 | 0.021744411 |
| <i>Fzd8</i>          | ENSMUSG00000036904 | -1.144347481 | 0.021750493 |
| <i>Asb12</i>         | ENSMUSG00000031204 | -0.724217441 | 0.02175307  |
| <i>Cpm</i>           | ENSMUSG00000020183 | 1.141481686  | 0.021781045 |
| <i>Plec</i>          | ENSMUSG00000022565 | -0.517684725 | 0.021869233 |
| <i>Tsc2</i>          | ENSMUSG00000002496 | -0.650189031 | 0.021899427 |
| <i>Gm6311</i>        | ENSMUSG00000061833 | 0.733749037  | 0.021935378 |
| <i>Ager</i>          | ENSMUSG00000015452 | 5.163726393  | 0.021935378 |
| <i>Sox6os</i>        | ENSMUSG00000030664 | -1.764977539 | 0.022047536 |
| <i>Scfd1</i>         | ENSMUSG00000020952 | 0.529978203  | 0.022070621 |
| <i>Lrtm1</i>         | ENSMUSG00000045776 | -1.435613356 | 0.022101698 |
| <i>Ptprcap</i>       | ENSMUSG00000045826 | 2.309944197  | 0.02211563  |
| <i>Tmem218</i>       | ENSMUSG00000032121 | -0.662046476 | 0.02218576  |
| <i>Ptges3-ps</i>     | ENSMUSG00000040078 | 0.580424656  | 0.022200364 |
| <i>Nup214</i>        | ENSMUSG00000001855 | -0.784398406 | 0.022329472 |
| <i>Itga9</i>         | ENSMUSG00000039115 | 0.517390777  | 0.022428855 |
| <i>Psemb5</i>        | ENSMUSG00000022193 | 0.434241431  | 0.022445953 |
| <i>Pcdh15</i>        | ENSMUSG00000052613 | -2.580924925 | 0.022458254 |
| <i>Degs1</i>         | ENSMUSG00000038633 | 0.437408656  | 0.022473481 |
| <i>Eif2b5</i>        | ENSMUSG00000003235 | 0.509697543  | 0.022503441 |
| <i>Sned1</i>         | ENSMUSG00000047793 | -1.487558145 | 0.022519787 |
| <i>Slc45a4</i>       | ENSMUSG00000079020 | -0.654018977 | 0.022638122 |
| <i>Zfp14</i>         | ENSMUSG00000053985 | -1.183607697 | 0.022642319 |
| <i>Cd302</i>         | ENSMUSG00000060703 | 0.682958366  | 0.022668985 |
| <i>Inpp5k</i>        | ENSMUSG00000006127 | -0.576317702 | 0.022668985 |
| <i>Gata2</i>         | ENSMUSG00000015053 | -0.67111518  | 0.022668985 |

|                       |                    |              |             |
|-----------------------|--------------------|--------------|-------------|
| <i>Mrpl44</i>         | ENSMUSG00000026248 | -0.537833598 | 0.022668985 |
| <i>Begain</i>         | ENSMUSG00000040867 | 2.024307355  | 0.02268756  |
| <i>Asflb</i>          | ENSMUSG00000005470 | 1.141952799  | 0.022696361 |
| <i>Serac1</i>         | ENSMUSG00000015659 | -1.18878311  | 0.022731062 |
| <i>Asb13</i>          | ENSMUSG00000033781 | -0.671343393 | 0.022731062 |
| <i>Myll1</i>          | ENSMUSG00000061816 | -0.662533489 | 0.02276203  |
| <i>Bst2</i>           | ENSMUSG00000046718 | 0.793704869  | 0.02276203  |
| <i>Coq7</i>           | ENSMUSG00000030652 | -0.563146293 | 0.022771738 |
| <i>Ccng1</i>          | ENSMUSG00000020326 | -0.57331174  | 0.022771738 |
| <i>Smim3</i>          | ENSMUSG00000038059 | -0.676088467 | 0.022801584 |
| <i>Mllt6</i>          | ENSMUSG00000038437 | -0.577439831 | 0.02286545  |
| <i>Dram1</i>          | ENSMUSG00000020057 | 0.80308594   | 0.02286545  |
| <i>Phldb1</i>         | ENSMUSG00000048537 | -0.499635004 | 0.022934536 |
| <i>Eif2b3</i>         | ENSMUSG00000028683 | 0.625992784  | 0.022979654 |
| <i>Tmem173</i>        | ENSMUSG00000024349 | 0.762973406  | 0.022984602 |
| <i>Sox17</i>          | ENSMUSG00000025902 | 0.7831107    | 0.023045922 |
| <i>Mga</i>            | ENSMUSG00000033943 | -0.663495786 | 0.023090076 |
| <i>Prdx3</i>          | ENSMUSG00000024997 | -0.489262581 | 0.023110418 |
| <i>Cyb5d2</i>         | ENSMUSG00000057778 | -0.642192372 | 0.023141043 |
| <i>Tmcc2</i>          | ENSMUSG00000042066 | -0.593084659 | 0.023207062 |
| <i>Emc1</i>           | ENSMUSG00000078517 | -0.62377626  | 0.02321933  |
| <i>Trpc6</i>          | ENSMUSG00000031997 | 4.557534535  | 0.02321933  |
| <i>Gm11942</i>        | ENSMUSG00000094344 | 1.156881151  | 0.023224221 |
| <i>Them6</i>          | ENSMUSG00000056665 | -0.688308172 | 0.023274496 |
| <i>Slc35b2</i>        | ENSMUSG00000037089 | 0.459835316  | 0.023276866 |
| <i>CAAA01118383.1</i> | ENSMUSG00000063897 | 0.585614101  | 0.023281259 |
| <i>Vapa</i>           | ENSMUSG00000024091 | 0.426024638  | 0.023301311 |
| <i>Cdca7l</i>         | ENSMUSG00000021175 | 1.864249105  | 0.02330951  |
| <i>Msh2</i>           | ENSMUSG00000024151 | -0.605951098 | 0.023376431 |
| <i>Foxc1</i>          | ENSMUSG00000050295 | -0.577144786 | 0.023400665 |
| <i>Ndufa5</i>         | ENSMUSG00000023089 | -0.565797022 | 0.023469053 |
| <i>Sntb1</i>          | ENSMUSG00000060429 | 1.0739479    | 0.023531712 |
| <i>Tspan17</i>        | ENSMUSG00000025875 | 0.733314192  | 0.023545569 |
| <i>Eeflg</i>          | ENSMUSG00000071644 | 0.411526779  | 0.023549057 |
| <i>Ttc30a2</i>        | ENSMUSG00000075272 | -2.256235932 | 0.023561964 |
| <i>Arap2</i>          | ENSMUSG00000037999 | -0.870542566 | 0.023571042 |
| <i>Cyp1b1</i>         | ENSMUSG00000024087 | 0.681880356  | 0.023613719 |
| <i>Polr1d</i>         | ENSMUSG00000029642 | 0.451453968  | 0.023613719 |
| <i>Gm20442</i>        | ENSMUSG00000092600 | 5.095533249  | 0.023614853 |
| <i>Pla1a</i>          | ENSMUSG00000002847 | 0.576509422  | 0.023658737 |

|                      |                    |              |             |
|----------------------|--------------------|--------------|-------------|
| <i>Lrig1</i>         | ENSMUSG00000030029 | -0.573110065 | 0.023697093 |
| <i>Dmxl1</i>         | ENSMUSG00000037416 | -0.586778004 | 0.023697641 |
| <i>Bace1</i>         | ENSMUSG00000032086 | -0.673973904 | 0.02374415  |
| <i>Gsta3</i>         | ENSMUSG00000025934 | -0.751819364 | 0.023745553 |
| <i>Mrps18b</i>       | ENSMUSG00000024436 | 0.634377832  | 0.023848869 |
| <i>Pgls</i>          | ENSMUSG00000031807 | 0.499469969  | 0.023848869 |
| <i>Psd3</i>          | ENSMUSG00000030465 | -0.57514439  | 0.023862256 |
| <i>Uqcc1</i>         | ENSMUSG00000005882 | -0.573062    | 0.023914822 |
| <i>Mcm3ap</i>        | ENSMUSG00000001150 | -0.705854242 | 0.023914822 |
| <i>Gm13835</i>       | ENSMUSG00000086922 | 0.465436521  | 0.023934868 |
| <i>Myh7b</i>         | ENSMUSG00000074652 | -0.87275833  | 0.023934868 |
| <i>Fblim1</i>        | ENSMUSG00000006219 | -0.503214183 | 0.023934868 |
| <i>Entpd1</i>        | ENSMUSG00000048120 | 0.519174616  | 0.023998343 |
| <i>Gm4654</i>        | ENSMUSG00000098111 | 1.336819261  | 0.023998343 |
| <i>Clqa</i>          | ENSMUSG00000036887 | 0.620128236  | 0.023998343 |
| <i>2810430I11Rik</i> | ENSMUSG00000085766 | 4.822193467  | 0.024053141 |
| <i>Lrpprc</i>        | ENSMUSG00000024120 | -0.563202485 | 0.024099456 |
| <i>Klhl38</i>        | ENSMUSG00000022357 | -1.044436449 | 0.024099456 |
| <i>Sec14l5</i>       | ENSMUSG00000091712 | -2.45203557  | 0.024123672 |
| <i>Cox7b</i>         | ENSMUSG00000031231 | -0.541289252 | 0.024124542 |
| <i>Pvt1</i>          | ENSMUSG00000097039 | 1.377871138  | 0.02416364  |
| <i>Cxcl9</i>         | ENSMUSG00000029417 | 1.131701342  | 0.024170895 |
| <i>Iscal</i>         | ENSMUSG00000044792 | -0.545359814 | 0.024181662 |
| <i>Khdrbs3</i>       | ENSMUSG00000022332 | -0.611336452 | 0.02435106  |
| <i>Fam84a</i>        | ENSMUSG00000020607 | -1.625628256 | 0.02435106  |
| <i>Milr1</i>         | ENSMUSG00000040528 | 1.055203174  | 0.024370974 |
| <i>Gdpd5</i>         | ENSMUSG00000035314 | -0.695603443 | 0.024486976 |
| <i>Rps9</i>          | ENSMUSG00000006333 | 0.523441605  | 0.024487331 |
| <i>Tfpi2</i>         | ENSMUSG00000029664 | 1.196377454  | 0.024516324 |
| <i>Rab39b</i>        | ENSMUSG00000031202 | 3.02758283   | 0.024568916 |
| <i>Fap</i>           | ENSMUSG00000000392 | 0.83753444   | 0.024634716 |
| <i>Fbxw7</i>         | ENSMUSG00000028086 | -0.713966675 | 0.024635373 |
| <i>Pnck</i>          | ENSMUSG00000002012 | -1.078321424 | 0.024666958 |
| <i>Retsat</i>        | ENSMUSG00000056666 | -0.766900672 | 0.024666958 |
| <i>Nfe2l2</i>        | ENSMUSG00000015839 | 0.499005016  | 0.024666958 |
| <i>Pemt</i>          | ENSMUSG00000000301 | 1.192977518  | 0.024673577 |
| <i>Gnptab</i>        | ENSMUSG00000035311 | -0.552330388 | 0.024677394 |
| <i>Prpf40a</i>       | ENSMUSG00000061136 | 0.529895228  | 0.0247039   |
| <i>2310075C17Rik</i> | ENSMUSG00000089718 | -4.641294672 | 0.024768297 |
| <i>Cnn1</i>          | ENSMUSG00000001349 | 1.27715207   | 0.024835593 |

|                   |                    |              |             |
|-------------------|--------------------|--------------|-------------|
| <i>Pdia6</i>      | ENSMUSG00000020571 | 0.516858691  | 0.024911971 |
| <i>Map2</i>       | ENSMUSG00000015222 | 1.138086769  | 0.024923536 |
| <i>Gm10705</i>    | ENSMUSG00000074506 | -1.391698064 | 0.025001523 |
| <i>AC151284.1</i> | ENSMUSG00000117192 | -2.127469696 | 0.025001523 |
| <i>Rps6ka5</i>    | ENSMUSG00000021180 | -0.813223867 | 0.025008638 |
| <i>Acad8</i>      | ENSMUSG00000031969 | -0.538948462 | 0.025008638 |
| <i>Gm31166</i>    | ENSMUSG00000109695 | -1.252099381 | 0.025012996 |
| <i>Rnd2</i>       | ENSMUSG00000001313 | 0.691745572  | 0.025029073 |
| <i>Sac3d1</i>     | ENSMUSG00000024790 | 0.566620429  | 0.025049467 |
| <i>Rreb1</i>      | ENSMUSG00000039087 | -0.788400619 | 0.02514081  |
| <i>Ralgps2</i>    | ENSMUSG00000026594 | -0.681159897 | 0.02514081  |
| <i>Il18r1</i>     | ENSMUSG00000026070 | -1.680958766 | 0.025170099 |
| <i>H13</i>        | ENSMUSG00000019188 | 0.508755377  | 0.025217365 |
| <i>Card9</i>      | ENSMUSG00000026928 | 1.34707086   | 0.025242274 |
| <i>Fam207a</i>    | ENSMUSG00000032977 | 0.692235221  | 0.025458261 |
| <i>Sec13</i>      | ENSMUSG00000030298 | 0.442635204  | 0.025568713 |
| <i>Uba7</i>       | ENSMUSG00000032596 | -0.611623184 | 0.025605551 |
| <i>B3galnt2</i>   | ENSMUSG00000039242 | -0.671213662 | 0.025605551 |
| <i>Casd1</i>      | ENSMUSG00000015189 | -0.703065774 | 0.025620699 |
| <i>Zfp422-ps</i>  | ENSMUSG00000091515 | -1.77883091  | 0.025641293 |
| <i>Bphl</i>       | ENSMUSG00000038286 | -0.709099079 | 0.025669909 |
| <i>Ube2e2</i>     | ENSMUSG00000058317 | 0.662238319  | 0.025669909 |
| <i>Btla</i>       | ENSMUSG00000052013 | 1.980887038  | 0.025868796 |
| <i>Atp6ap1l</i>   | ENSMUSG00000078958 | -2.016831825 | 0.025875423 |
| <i>Nfkbil1</i>    | ENSMUSG00000042419 | 0.792916284  | 0.025875423 |
| <i>Ttc12</i>      | ENSMUSG00000040219 | -0.689760977 | 0.025923792 |
| <i>Gm17473</i>    | ENSMUSG00000097805 | -2.49154446  | 0.025928109 |
| <i>Pdlim5</i>     | ENSMUSG00000028273 | 0.485463098  | 0.025940827 |
| <i>Pparg</i>      | ENSMUSG00000000440 | 0.764619937  | 0.025944568 |
| <i>Rnf103</i>     | ENSMUSG00000052656 | 0.522656847  | 0.025944568 |
| <i>Tmem74b</i>    | ENSMUSG00000044364 | 1.035302849  | 0.026130327 |
| <i>Shc2</i>       | ENSMUSG00000020312 | 0.935610064  | 0.026139359 |
| <i>Abcc3</i>      | ENSMUSG00000020865 | 1.2301754    | 0.026139359 |
| <i>AC154478.1</i> | ENSMUSG00000116725 | -1.256177047 | 0.026140232 |
| <i>Fbxo17</i>     | ENSMUSG00000030598 | 1.220079072  | 0.026144227 |
| <i>Klk1b26</i>    | ENSMUSG00000053719 | -4.086380191 | 0.026144227 |
| <i>Lat2</i>       | ENSMUSG00000040751 | 1.480952968  | 0.026148099 |
| <i>Zim1</i>       | ENSMUSG00000002266 | -4.030638567 | 0.026148099 |
| <i>Pdpl</i>       | ENSMUSG00000049225 | -0.537338861 | 0.026150298 |
| <i>Ttyh2</i>      | ENSMUSG00000034714 | 1.15190505   | 0.026240733 |

|                      |                    |              |             |
|----------------------|--------------------|--------------|-------------|
| <i>Cyp2d22</i>       | ENSMUSG00000061740 | -0.642341657 | 0.026254356 |
| <i>Kif21a</i>        | ENSMUSG00000022629 | -0.781316348 | 0.026360069 |
| <i>Ints11</i>        | ENSMUSG00000029034 | 0.644946461  | 0.026360069 |
| <i>BC067074</i>      | ENSMUSG00000021763 | -2.776690669 | 0.026367813 |
| <i>Araf</i>          | ENSMUSG00000001127 | -0.435619714 | 0.026438846 |
| <i>Asxl2</i>         | ENSMUSG00000037486 | -0.695384264 | 0.026453541 |
| <i>Rpl18</i>         | ENSMUSG00000059070 | 0.501767184  | 0.026506845 |
| <i>2210011C24Rik</i> | ENSMUSG00000074217 | -1.073224065 | 0.026627226 |
| <i>Psmb8</i>         | ENSMUSG00000024338 | 0.701413907  | 0.026627226 |
| <i>mt-Co1</i>        | ENSMUSG00000064351 | -0.614609263 | 0.026687476 |
| <i>Kctd6</i>         | ENSMUSG00000021752 | 0.671118702  | 0.026754162 |
| <i>Hrasls</i>        | ENSMUSG00000022525 | -0.63615208  | 0.026792052 |
| <i>Gbp4</i>          | ENSMUSG00000079363 | -0.790058357 | 0.026913902 |
| <i>Rgs19</i>         | ENSMUSG00000002458 | 0.694874553  | 0.026924422 |
| <i>Spsb3</i>         | ENSMUSG00000024160 | 0.849319178  | 0.026942751 |
| <i>Slc35d1</i>       | ENSMUSG00000028521 | -0.878980606 | 0.027042007 |
| <i>Mad11l</i>        | ENSMUSG00000029554 | 0.767346321  | 0.027042007 |
| <i>Mrpl30</i>        | ENSMUSG00000026087 | -0.409908918 | 0.027047702 |
| <i>C530005A16Rik</i> | ENSMUSG00000085408 | -1.840079187 | 0.027053019 |
| <i>Zfp948</i>        | ENSMUSG00000067931 | 0.904432915  | 0.027077252 |
| <i>Spen</i>          | ENSMUSG00000040761 | -0.914587082 | 0.027077252 |
| <i>Nsl1</i>          | ENSMUSG00000062510 | 1.726481021  | 0.027077252 |
| <i>Gm6658</i>        | ENSMUSG00000074171 | -1.510504476 | 0.027152054 |
| <i>Gm36372</i>       | ENSMUSG00000113975 | -0.789288753 | 0.027186614 |
| <i>Sacs</i>          | ENSMUSG00000048279 | -0.859573959 | 0.027214856 |
| <i>Tcp1</i>          | ENSMUSG00000068039 | 0.502044719  | 0.0272452   |
| <i>Igsf9b</i>        | ENSMUSG00000034275 | -1.471335671 | 0.027281734 |
| <i>Ndufa4l2</i>      | ENSMUSG00000040280 | 0.700357192  | 0.027286598 |
| <i>Atp6v1b2</i>      | ENSMUSG00000006273 | 0.503949681  | 0.027286598 |
| <i>Amz1</i>          | ENSMUSG00000050022 | 1.594060099  | 0.027374079 |
| <i>Cetn3</i>         | ENSMUSG00000021537 | 0.478834401  | 0.027374079 |
| <i>Smad9</i>         | ENSMUSG00000027796 | -1.326835401 | 0.027374079 |
| <i>Gm12295</i>       | ENSMUSG00000085162 | 0.901022571  | 0.027374079 |
| <i>Mindy3</i>        | ENSMUSG00000026767 | 0.523235574  | 0.027374079 |
| <i>Ccnt2</i>         | ENSMUSG00000026349 | -0.657949607 | 0.027375778 |
| <i>Tfdp2</i>         | ENSMUSG00000032411 | -0.544745459 | 0.027437113 |
| <i>Gm10698</i>       | ENSMUSG00000079884 | 0.813250411  | 0.027437113 |
| <i>Agfg1</i>         | ENSMUSG00000026159 | 0.4838918    | 0.027441824 |
| <i>Isg20</i>         | ENSMUSG00000039236 | 0.738849946  | 0.027565401 |
| <i>Gm39822</i>       | ENSMUSG00000110618 | 2.106688582  | 0.027601524 |

|                    |                    |              |             |
|--------------------|--------------------|--------------|-------------|
| <i>N4bp3</i>       | ENSMUSG00000001053 | 0.755988634  | 0.027606286 |
| <i>Dnaja1</i>      | ENSMUSG00000028410 | 0.657522041  | 0.027657626 |
| <i>Rps18-ps3</i>   | ENSMUSG00000057657 | -2.058704393 | 0.027657626 |
| <i>Rnf144a</i>     | ENSMUSG00000020642 | 0.707384833  | 0.027689717 |
| <i>Rpe</i>         | ENSMUSG00000026005 | 0.574037411  | 0.027710235 |
| <i>Zfp963</i>      | ENSMUSG00000092260 | -1.622059851 | 0.027713706 |
| <i>Zfp446</i>      | ENSMUSG00000033961 | -1.21927499  | 0.027713706 |
| <i>Cyc1</i>        | ENSMUSG00000022551 | -0.420320232 | 0.027726869 |
| <i>Ndufa8</i>      | ENSMUSG00000026895 | -0.43340897  | 0.027746632 |
| <i>Inhba</i>       | ENSMUSG00000041324 | 0.939407878  | 0.027803243 |
| <i>Otulinl</i>     | ENSMUSG00000056069 | 0.806561626  | 0.027803243 |
| <i>Rpl22</i>       | ENSMUSG00000028936 | 0.565202335  | 0.027817562 |
| <i>Bmper</i>       | ENSMUSG00000031963 | -0.717217109 | 0.027851935 |
| <i>Camk2n1</i>     | ENSMUSG00000046447 | 0.519998829  | 0.027851935 |
| <i>Mir133a-1hg</i> | ENSMUSG00000095438 | -0.952337881 | 0.027851935 |
| <i>Nr1h3</i>       | ENSMUSG00000002108 | -0.523375669 | 0.027851935 |
| <i>Ptpmt1</i>      | ENSMUSG00000063235 | 0.485966399  | 0.027854714 |
| <i>Sema5b</i>      | ENSMUSG00000052133 | -2.000055606 | 0.027869444 |
| <i>Fam81a</i>      | ENSMUSG00000032224 | -0.737254253 | 0.027869444 |
| <i>Arl4a</i>       | ENSMUSG00000047446 | 0.478997659  | 0.028024718 |
| <i>Hes6</i>        | ENSMUSG00000067071 | -0.668547019 | 0.028064913 |
| <i>Cdc16</i>       | ENSMUSG00000038416 | 0.459471531  | 0.028073337 |
| <i>Tnrc18</i>      | ENSMUSG00000039477 | -0.736965244 | 0.028079657 |
| <i>Slc39a1</i>     | ENSMUSG00000052310 | 0.55040694   | 0.028097747 |
| <i>Llgl2</i>       | ENSMUSG00000020782 | -0.737075628 | 0.028133801 |
| <i>Rnf138</i>      | ENSMUSG00000024317 | 0.641831244  | 0.028334569 |
| <i>Hmcn2</i>       | ENSMUSG00000055632 | -1.134482699 | 0.028348629 |
| <i>Csad</i>        | ENSMUSG00000023044 | 0.656110194  | 0.028442396 |
| <i>Rps15</i>       | ENSMUSG00000063457 | 0.467043421  | 0.028521067 |
| <i>Exo1</i>        | ENSMUSG00000039748 | 2.826889387  | 0.028521067 |
| <i>F2rl3</i>       | ENSMUSG00000050147 | 2.050912684  | 0.028654935 |
| <i>Foxd2os</i>     | ENSMUSG00000085399 | 1.641810068  | 0.028708913 |
| <i>Gpx1</i>        | ENSMUSG00000063856 | 0.57242635   | 0.028718169 |
| <i>Ing5</i>        | ENSMUSG00000026283 | -0.671145037 | 0.028743614 |
| <i>Plek</i>        | ENSMUSG00000020120 | 0.769406301  | 0.028817363 |
| <i>Atp5c1</i>      | ENSMUSG00000025781 | -0.431581913 | 0.028849752 |
| <i>Top1mt</i>      | ENSMUSG00000000934 | -0.909902952 | 0.028854775 |
| <i>Insr</i>        | ENSMUSG00000005534 | -0.556032758 | 0.028854775 |
| <i>Tdg</i>         | ENSMUSG00000034674 | 0.705037791  | 0.028861163 |
| <i>Cfl2</i>        | ENSMUSG00000062929 | 0.404250168  | 0.028965398 |

|                |                    |              |             |
|----------------|--------------------|--------------|-------------|
| <i>Dscc1</i>   | ENSMUSG00000022422 | 2.265955885  | 0.029007413 |
| <i>Zmat1</i>   | ENSMUSG00000052676 | -0.815500575 | 0.029048855 |
| <i>Gm2574</i>  | ENSMUSG00000078162 | 1.712110911  | 0.029049617 |
| <i>Aqp11</i>   | ENSMUSG00000042797 | -1.541086429 | 0.029115532 |
| <i>Acvrl1</i>  | ENSMUSG00000000530 | 0.504117469  | 0.029122897 |
| <i>Enkur</i>   | ENSMUSG00000026679 | 1.833077778  | 0.029126141 |
| <i>Usp35</i>   | ENSMUSG00000035713 | 1.545110345  | 0.029173994 |
| <i>Mrvi1</i>   | ENSMUSG00000005611 | -1.064643254 | 0.029178329 |
| <i>Dse</i>     | ENSMUSG00000039497 | 0.58837597   | 0.029181383 |
| <i>Kif26b</i>  | ENSMUSG00000026494 | 1.284262612  | 0.029181383 |
| <i>Acsl5</i>   | ENSMUSG00000024981 | 0.535780439  | 0.029181383 |
| <i>Hspa13</i>  | ENSMUSG00000032932 | 0.530322036  | 0.02918227  |
| <i>Nomo1</i>   | ENSMUSG00000030835 | -0.589027802 | 0.02918662  |
| <i>Gm15559</i> | ENSMUSG00000086401 | 3.410278679  | 0.029186984 |
| <i>Cfap45</i>  | ENSMUSG00000026546 | 2.449139898  | 0.029220007 |
| <i>Gm9108</i>  | ENSMUSG00000115819 | -0.687894581 | 0.029220007 |
| <i>Ier2</i>    | ENSMUSG00000053560 | 0.675114657  | 0.029220007 |
| <i>Parva</i>   | ENSMUSG00000030770 | 0.535310226  | 0.029245137 |
| <i>Spg21</i>   | ENSMUSG00000032388 | 0.645719232  | 0.029251184 |
| <i>Itgb7</i>   | ENSMUSG00000001281 | 1.230103486  | 0.029287274 |
| <i>Jarid2</i>  | ENSMUSG00000038518 | -0.633762052 | 0.02938629  |
| <i>Omal</i>    | ENSMUSG00000035069 | -0.597772571 | 0.029482615 |
| <i>Gm5641</i>  | ENSMUSG00000069014 | 1.231526673  | 0.029514332 |
| <i>Gas5</i>    | ENSMUSG00000053332 | 0.753830605  | 0.02955137  |
| <i>Magi2</i>   | ENSMUSG00000040003 | -0.943000753 | 0.029558352 |
| <i>Ctsf</i>    | ENSMUSG00000083282 | -0.572714548 | 0.029558352 |
| <i>Stard13</i> | ENSMUSG00000016128 | -0.616144431 | 0.029785255 |
| <i>Ldb2</i>    | ENSMUSG00000039706 | 0.856268484  | 0.029785255 |
| <i>mt-Nd1</i>  | ENSMUSG00000064341 | -0.647989177 | 0.029822476 |
| <i>Gm3531</i>  | ENSMUSG00000089782 | 0.793829139  | 0.029898256 |
| <i>Mtdh</i>    | ENSMUSG00000022255 | 0.525696027  | 0.029898595 |
| <i>Stx5a</i>   | ENSMUSG00000010110 | 0.534950398  | 0.029935329 |
| <i>Ccdc117</i> | ENSMUSG00000020482 | -0.533905324 | 0.029948155 |
| <i>Mlap</i>    | ENSMUSG00000030041 | 2.834493973  | 0.029978761 |
| <i>Cxcl1</i>   | ENSMUSG00000029380 | -1.314838604 | 0.029981042 |
| <i>Gmpr</i>    | ENSMUSG00000000253 | -0.486755009 | 0.030028139 |
| <i>Psma5</i>   | ENSMUSG00000068749 | 0.451392985  | 0.030130278 |
| <i>Lrrc8b</i>  | ENSMUSG00000070639 | 0.753545573  | 0.030141074 |
| <i>Amdhd2</i>  | ENSMUSG00000036820 | 0.726288342  | 0.030141074 |
| <i>Plaur</i>   | ENSMUSG00000046223 | 1.050883868  | 0.030145727 |

|                      |                    |              |             |
|----------------------|--------------------|--------------|-------------|
| <i>Zfp330</i>        | ENSMUSG00000031711 | 0.494133703  | 0.030261613 |
| <i>Crmp1</i>         | ENSMUSG00000029121 | 2.305302953  | 0.030261613 |
| <i>Sdr39u1</i>       | ENSMUSG00000022223 | -0.595897719 | 0.030341506 |
| <i>Cnr2</i>          | ENSMUSG00000062585 | 1.696661391  | 0.030361848 |
| <i>Stap2</i>         | ENSMUSG00000038781 | 0.606393582  | 0.030379355 |
| <i>Hic1</i>          | ENSMUSG00000043099 | -0.693053887 | 0.030405086 |
| <i>Lsamp</i>         | ENSMUSG00000061080 | -0.985339441 | 0.030416387 |
| <i>Rps6kb2</i>       | ENSMUSG00000024830 | -0.621386368 | 0.030423208 |
| <i>Azin1</i>         | ENSMUSG00000037458 | 0.416224961  | 0.030438593 |
| <i>Gngt2</i>         | ENSMUSG00000038811 | 0.697254618  | 0.030447504 |
| <i>Txndc12</i>       | ENSMUSG00000028567 | 0.524222573  | 0.030447504 |
| <i>Trim68</i>        | ENSMUSG00000073968 | -0.742254855 | 0.030447504 |
| <i>Kifc1</i>         | ENSMUSG00000079553 | 1.592235228  | 0.030447504 |
| <i>Cdkn2b</i>        | ENSMUSG00000073802 | 1.522291848  | 0.030491895 |
| <i>Bcl2a1a</i>       | ENSMUSG00000102037 | 2.07192298   | 0.030491895 |
| <i>Pnpla8</i>        | ENSMUSG00000036257 | -0.468329509 | 0.030561432 |
| <i>Golgb1</i>        | ENSMUSG00000034243 | -0.599031076 | 0.030561432 |
| <i>Rdh11</i>         | ENSMUSG00000066441 | 0.86002157   | 0.030561432 |
| <i>Srgn</i>          | ENSMUSG00000020077 | 0.691558161  | 0.030561432 |
| <i>Pcgf6</i>         | ENSMUSG00000025050 | 0.978585095  | 0.030567208 |
| <i>Kcnj3</i>         | ENSMUSG00000026824 | -1.87519549  | 0.030567208 |
| <i>2810004N23Rik</i> | ENSMUSG00000031984 | -0.439721588 | 0.030571598 |
| <i>Fam49b</i>        | ENSMUSG00000022378 | 0.535909262  | 0.030606612 |
| <i>Camkk1</i>        | ENSMUSG00000020785 | 1.057782721  | 0.030670983 |
| <i>Prickle1</i>      | ENSMUSG00000036158 | -0.711314044 | 0.030681865 |
| <i>Ano5</i>          | ENSMUSG00000055489 | -3.32351678  | 0.03074074  |
| <i>Slc22a23</i>      | ENSMUSG00000038267 | -1.179431392 | 0.030804941 |
| <i>Sfxn4</i>         | ENSMUSG00000063698 | -0.808222105 | 0.030822065 |
| <i>1010001B22Rik</i> | ENSMUSG00000097863 | -2.359639105 | 0.030839569 |
| <i>Slc5a3</i>        | ENSMUSG00000089774 | 1.21029388   | 0.030887732 |
| <i>Gm15163</i>       | ENSMUSG00000085711 | -0.84956581  | 0.030887732 |
| <i>Lrrc27</i>        | ENSMUSG00000015980 | -0.687221074 | 0.031073486 |
| <i>Lmod2</i>         | ENSMUSG00000029683 | 0.448097601  | 0.031204551 |
| <i>Gm33023</i>       | ENSMUSG00000110652 | -1.693961947 | 0.031208519 |
| <i>Ppan</i>          | ENSMUSG00000004100 | 0.725286795  | 0.031270696 |
| <i>Sdad1</i>         | ENSMUSG00000029415 | 0.660901168  | 0.031270696 |
| <i>Nat8f3</i>        | ENSMUSG00000051262 | -5.094750106 | 0.031358705 |
| <i>Alox5ap</i>       | ENSMUSG00000060063 | 0.76453038   | 0.031368413 |
| <i>Phax</i>          | ENSMUSG00000008301 | 0.533405483  | 0.031384995 |
| <i>Dpp9</i>          | ENSMUSG00000001229 | -0.526886619 | 0.03143399  |



|                  |                    |              |             |
|------------------|--------------------|--------------|-------------|
| <i>Mum1</i>      | ENSMUSG00000020156 | -0.64988698  | 0.031482395 |
| <i>Wtip</i>      | ENSMUSG00000036459 | 0.607055116  | 0.031482395 |
| <i>Col22a1</i>   | ENSMUSG00000079022 | 2.677009023  | 0.031482395 |
| <i>Gpd2</i>      | ENSMUSG00000026827 | -0.818398914 | 0.031482395 |
| <i>Uqcrc2</i>    | ENSMUSG00000030884 | -0.505509374 | 0.031482395 |
| <i>Hspa1a</i>    | ENSMUSG00000091971 | 2.36887584   | 0.031508045 |
| <i>Gm43823</i>   | ENSMUSG00000106224 | -1.872531939 | 0.031508045 |
| <i>Rpl34-ps1</i> | ENSMUSG00000068396 | 0.781302571  | 0.031537527 |
| <i>Gm42732</i>   | ENSMUSG00000107331 | -1.514467505 | 0.031546534 |
| <i>Timm21</i>    | ENSMUSG00000024645 | -0.609278873 | 0.031567577 |
| <i>Gm11263</i>   | ENSMUSG00000083496 | 0.992493681  | 0.031604423 |
| <i>Tnxb</i>      | ENSMUSG00000033327 | -0.516596437 | 0.031606289 |
| <i>Rere</i>      | ENSMUSG00000039852 | -0.49695262  | 0.031620727 |
| <i>Tnfaip6</i>   | ENSMUSG00000053475 | 1.243970999  | 0.031674859 |
| <i>Pik3r4</i>    | ENSMUSG00000032571 | -0.661193999 | 0.031674859 |
| <i>Fbxo33</i>    | ENSMUSG00000035329 | 0.643884056  | 0.031912206 |
| <i>Mrln</i>      | ENSMUSG00000019933 | -2.85871051  | 0.031915546 |
| <i>Slc52a3</i>   | ENSMUSG00000027463 | 1.348990004  | 0.03208223  |
| <i>Igtp</i>      | ENSMUSG00000078853 | -0.661449321 | 0.03208223  |
| <i>Rgs7</i>      | ENSMUSG00000026527 | -1.299862916 | 0.032140684 |
| <i>Rhoa</i>      | ENSMUSG00000007815 | 0.406922999  | 0.032174055 |
| <i>BC004004</i>  | ENSMUSG00000052712 | -0.47081096  | 0.032266671 |
| <i>Mill2</i>     | ENSMUSG00000040987 | -0.615942838 | 0.032274526 |
| <i>P3h3</i>      | ENSMUSG00000023191 | 0.562811092  | 0.032290719 |
| <i>Arl6</i>      | ENSMUSG00000022722 | 0.646618285  | 0.032305951 |
| <i>Lrr1</i>      | ENSMUSG00000034883 | 4.518490004  | 0.032374207 |
| <i>Soat1</i>     | ENSMUSG00000026600 | 0.622139978  | 0.032431299 |
| <i>Sdhc</i>      | ENSMUSG00000058076 | -0.471957391 | 0.032431299 |
| <i>Rpl10</i>     | ENSMUSG00000008682 | 0.489917499  | 0.032444517 |
| <i>Smtnl2</i>    | ENSMUSG00000045667 | -0.502134786 | 0.032516711 |
| <i>Kctd10</i>    | ENSMUSG00000001098 | 0.588543545  | 0.032551163 |
| <i>Aunip</i>     | ENSMUSG00000078521 | 4.060961457  | 0.032647409 |
| <i>Hnrnpa0</i>   | ENSMUSG00000007836 | 0.424754129  | 0.032650114 |
| <i>Usp9x</i>     | ENSMUSG00000031010 | -0.631795605 | 0.032747132 |
| <i>Lrrc20</i>    | ENSMUSG00000037151 | -0.647870145 | 0.03275912  |
| <i>Sft2d1</i>    | ENSMUSG00000073468 | 0.604500848  | 0.032805124 |
| <i>Mef2d</i>     | ENSMUSG00000001419 | -0.510654446 | 0.032825307 |
| <i>Rpl41</i>     | ENSMUSG00000093674 | 0.680478666  | 0.032825307 |
| <i>Ralb</i>      | ENSMUSG00000004451 | 0.462021865  | 0.032825307 |
| <i>Ttc1</i>      | ENSMUSG00000041278 | 0.442548646  | 0.032825307 |

|                      |                    |              |             |
|----------------------|--------------------|--------------|-------------|
| <i>Ppm1b</i>         | ENSMUSG00000061130 | -0.510650312 | 0.032825307 |
| <i>Arl1</i>          | ENSMUSG00000060904 | 0.396536423  | 0.032962483 |
| <i>Ago4</i>          | ENSMUSG00000042500 | -0.834707163 | 0.033020817 |
| <i>Tmed2</i>         | ENSMUSG00000029390 | 0.387991343  | 0.033104074 |
| <i>1010001N08Rik</i> | ENSMUSG00000097222 | -0.849222709 | 0.033155093 |
| <i>Borcs5</i>        | ENSMUSG00000042992 | -0.604837873 | 0.033174468 |
| <i>Pnrc1</i>         | ENSMUSG00000040128 | 0.446878742  | 0.033192712 |
| <i>Mrto4-ps2</i>     | ENSMUSG00000091105 | 4.943898595  | 0.033194467 |
| <i>Nat8f4</i>        | ENSMUSG00000068299 | -2.383384085 | 0.033220752 |
| <i>Nabp1</i>         | ENSMUSG00000026107 | 0.461928509  | 0.033235232 |
| <i>Ipo7</i>          | ENSMUSG00000066232 | 0.468765574  | 0.033300351 |
| <i>Cep104</i>        | ENSMUSG00000039523 | -0.572847406 | 0.033310601 |
| <i>Zscan26</i>       | ENSMUSG00000022228 | -0.651510123 | 0.033481678 |
| <i>Zmym5</i>         | ENSMUSG00000040123 | -0.504896305 | 0.033539213 |
| <i>Vcpkmt</i>        | ENSMUSG00000049882 | 0.742840305  | 0.033629832 |
| <i>Vasp</i>          | ENSMUSG00000030403 | 0.517352763  | 0.033704721 |
| <i>Dpysl5</i>        | ENSMUSG00000029168 | -2.026755685 | 0.033758708 |
| <i>Dhx57</i>         | ENSMUSG00000035051 | -0.780873667 | 0.03381636  |
| <i>A330074K22Rik</i> | ENSMUSG00000097960 | 2.810701703  | 0.03387266  |
| <i>Angptl1</i>       | ENSMUSG00000033544 | -1.517838707 | 0.033960214 |
| <i>Eps15l1</i>       | ENSMUSG00000006276 | -0.539657253 | 0.03407361  |
| <i>Plscr2</i>        | ENSMUSG00000032372 | 0.538870734  | 0.03407361  |
| <i>4930507D05Rik</i> | ENSMUSG00000097129 | 5.061022543  | 0.03409297  |
| <i>Lin7b</i>         | ENSMUSG00000003872 | -2.845683248 | 0.03409297  |
| <i>Arl11</i>         | ENSMUSG00000043157 | 0.975006973  | 0.034149945 |
| <i>Lrrc8c</i>        | ENSMUSG00000054720 | 0.647268448  | 0.034149945 |
| <i>Gm8394</i>        | ENSMUSG00000050490 | 0.763995808  | 0.03420743  |
| <i>Tagap</i>         | ENSMUSG00000033450 | 1.273912919  | 0.034217272 |
| <i>Stag2</i>         | ENSMUSG00000025862 | 0.461598627  | 0.034265474 |
| <i>1110059E24Rik</i> | ENSMUSG00000035171 | 0.567563167  | 0.034330041 |
| <i>Eif3h</i>         | ENSMUSG00000022312 | 0.472550685  | 0.034346067 |
| <i>Kif1b</i>         | ENSMUSG00000063077 | -0.573475921 | 0.034350076 |
| <i>Cep83</i>         | ENSMUSG00000020024 | 0.513036167  | 0.034350076 |
| <i>Metap1d</i>       | ENSMUSG00000041921 | -0.54789527  | 0.034426662 |
| <i>Olfm1</i>         | ENSMUSG00000026833 | 0.763867304  | 0.034433222 |
| <i>Mefv</i>          | ENSMUSG00000022534 | 2.721913804  | 0.034459179 |
| <i>Dstn</i>          | ENSMUSG00000015932 | 0.479638378  | 0.034459179 |
| <i>Ppefl</i>         | ENSMUSG00000062168 | 4.437796209  | 0.034459179 |
| <i>Zap70</i>         | ENSMUSG00000026117 | 2.762161142  | 0.034684819 |
| <i>Cbx3</i>          | ENSMUSG00000029836 | 0.583173594  | 0.034753277 |

|                      |                    |              |             |
|----------------------|--------------------|--------------|-------------|
| <i>Clk1</i>          | ENSMUSG00000026034 | -0.618746596 | 0.034789058 |
| <i>Mttp</i>          | ENSMUSG00000028158 | -0.954359027 | 0.034856405 |
| <i>Gda</i>           | ENSMUSG00000058624 | 0.554956689  | 0.034856405 |
| <i>Ythdf2</i>        | ENSMUSG00000040025 | 0.513336556  | 0.034953361 |
| <i>Gtf2fl</i>        | ENSMUSG00000002658 | 0.530343416  | 0.034980331 |
| <i>Cd8a</i>          | ENSMUSG00000053977 | 3.010129326  | 0.034983286 |
| <i>Lpcat3</i>        | ENSMUSG00000004270 | -0.597951119 | 0.035055057 |
| <i>9130015G15Rik</i> | ENSMUSG00000108950 | 2.708691081  | 0.035104574 |
| <i>Rab3ip</i>        | ENSMUSG00000064181 | 0.454457517  | 0.035139502 |
| <i>Atp5g3</i>        | ENSMUSG00000018770 | -0.483578596 | 0.035190744 |
| <i>Baiap2</i>        | ENSMUSG00000025372 | 0.625238855  | 0.035196513 |
| <i>Lcn2</i>          | ENSMUSG00000026822 | 0.736834284  | 0.035273116 |
| <i>Gm43980</i>       | ENSMUSG00000107962 | -5.004133089 | 0.035434502 |
| <i>Polr1e</i>        | ENSMUSG00000028318 | 0.636847092  | 0.035459785 |
| <i>Calhm6</i>        | ENSMUSG00000046031 | 1.571071496  | 0.035500423 |
| <i>Slco2b1</i>       | ENSMUSG00000030737 | -0.564619404 | 0.035500423 |
| <i>Syt7</i>          | ENSMUSG00000024743 | -0.769362931 | 0.035750736 |
| <i>Vil1</i>          | ENSMUSG00000026175 | -5.006532326 | 0.035774904 |
| <i>Hspa14</i>        | ENSMUSG00000109865 | 0.5129426    | 0.035790258 |
| <i>Clec4a2</i>       | ENSMUSG00000030148 | 0.947047251  | 0.035816316 |
| <i>Spred1</i>        | ENSMUSG00000027351 | 0.534231506  | 0.035831776 |
| <i>Opn4</i>          | ENSMUSG00000021799 | -0.978945956 | 0.035875807 |
| <i>Ifi203</i>        | ENSMUSG00000039997 | 0.535725665  | 0.035875807 |
| <i>Kcnk3</i>         | ENSMUSG00000049265 | -0.626099537 | 0.035875807 |
| <i>Sesn2</i>         | ENSMUSG00000028893 | 1.02159761   | 0.035911803 |
| <i>Fbrs11</i>        | ENSMUSG00000043323 | -0.54189252  | 0.035938009 |
| <i>Eif3m</i>         | ENSMUSG00000027170 | 0.41701591   | 0.036089315 |
| <i>Alms1</i>         | ENSMUSG00000063810 | -1.509315599 | 0.036092229 |
| <i>Rgs3</i>          | ENSMUSG00000059810 | -0.531855103 | 0.03611529  |
| <i>Flrt2</i>         | ENSMUSG00000047414 | -0.678865272 | 0.036229047 |
| <i>Tek</i>           | ENSMUSG00000006386 | -0.450390038 | 0.036229047 |
| <i>Klhl10</i>        | ENSMUSG00000001558 | -3.496777556 | 0.036229047 |
| <i>Pdlim1</i>        | ENSMUSG00000055044 | 0.434354939  | 0.036262148 |
| <i>Phf24</i>         | ENSMUSG00000036062 | -1.007970936 | 0.036380684 |
| <i>Tet1</i>          | ENSMUSG00000047146 | -1.348241742 | 0.036503301 |
| <i>Hist1h2ao</i>     | ENSMUSG00000094248 | 4.95127035   | 0.03665609  |
| <i>Slc2a8</i>        | ENSMUSG00000026791 | -0.596910073 | 0.036712905 |
| <i>Ube2s</i>         | ENSMUSG00000060860 | 0.472548338  | 0.036749739 |
| <i>Adgrd1</i>        | ENSMUSG00000044017 | -0.770956726 | 0.036763852 |
| <i>Gorasp2</i>       | ENSMUSG00000014959 | 0.439417377  | 0.036781358 |

|                  |                    |              |             |
|------------------|--------------------|--------------|-------------|
| <i>Gm38388</i>   | ENSMUSG00000103215 | -5.061711613 | 0.036814056 |
| <i>Mlh3</i>      | ENSMUSG00000021245 | -0.726552637 | 0.036859396 |
| <i>Tmem41a</i>   | ENSMUSG00000022856 | -0.632119396 | 0.03692677  |
| <i>Clca3a1</i>   | ENSMUSG00000056025 | 1.018634292  | 0.036932406 |
| <i>Gm12551</i>   | ENSMUSG00000081169 | 4.974106812  | 0.037165653 |
| <i>Prim2</i>     | ENSMUSG00000026134 | 0.919703227  | 0.037168064 |
| <i>Ankrd63</i>   | ENSMUSG00000078137 | -1.604341825 | 0.037265772 |
| <i>Bcl7a</i>     | ENSMUSG00000029438 | -0.847558533 | 0.037274701 |
| <i>Itgb6</i>     | ENSMUSG00000026971 | -1.297479304 | 0.03728427  |
| <i>Psm10</i>     | ENSMUSG00000031429 | 0.53486917   | 0.037296488 |
| <i>Pigg</i>      | ENSMUSG00000029263 | -0.967308159 | 0.03744465  |
| <i>Smug1</i>     | ENSMUSG00000036061 | -0.666323524 | 0.03748594  |
| <i>Dnajc16</i>   | ENSMUSG00000040697 | -0.642722621 | 0.037533868 |
| <i>Rnmt</i>      | ENSMUSG00000009535 | 0.520851394  | 0.037533868 |
| <i>Got2</i>      | ENSMUSG00000031672 | -0.433762486 | 0.037555515 |
| <i>Nmr11</i>     | ENSMUSG00000063445 | 0.832988341  | 0.037555515 |
| <i>Mical1</i>    | ENSMUSG00000019823 | 0.872293202  | 0.037556723 |
| <i>Gm13841</i>   | ENSMUSG00000083833 | 0.612524332  | 0.037643571 |
| <i>Atxn2</i>     | ENSMUSG00000042605 | -0.600895425 | 0.037651233 |
| <i>Bag5</i>      | ENSMUSG00000049792 | 0.485196891  | 0.037835632 |
| <i>Myot</i>      | ENSMUSG00000024471 | -0.675807451 | 0.037848391 |
| <i>Amot</i>      | ENSMUSG00000041688 | -0.637982914 | 0.037868704 |
| <i>Arhgef11</i>  | ENSMUSG00000041977 | -0.765119784 | 0.037868704 |
| <i>BC048679</i>  | ENSMUSG00000061877 | -5.01637595  | 0.037893128 |
| <i>Bub3</i>      | ENSMUSG00000066979 | 0.490786114  | 0.037943985 |
| <i>Adgrg3</i>    | ENSMUSG00000060470 | 1.000782854  | 0.038004011 |
| <i>Bloc1s5</i>   | ENSMUSG00000038982 | 0.484402381  | 0.038107077 |
| <i>Pdcl3</i>     | ENSMUSG00000026078 | 0.429460719  | 0.038171151 |
| <i>Taf1a</i>     | ENSMUSG00000072258 | -0.60056576  | 0.038216222 |
| <i>Mrps36</i>    | ENSMUSG00000061474 | -0.540460232 | 0.038225818 |
| <i>Ywhaq-ps3</i> | ENSMUSG00000080902 | 1.367220631  | 0.038225818 |
| <i>Nap113</i>    | ENSMUSG00000055733 | -1.549550546 | 0.038225818 |
| <i>Snrpd1</i>    | ENSMUSG00000002477 | 0.609499166  | 0.038250668 |
| <i>Mmp9</i>      | ENSMUSG00000017737 | -1.39488616  | 0.038262398 |
| <i>Gpr141</i>    | ENSMUSG00000053101 | 2.610289186  | 0.038276234 |
| <i>Mef2c</i>     | ENSMUSG00000005583 | -0.529329776 | 0.038347333 |
| <i>Zmat2</i>     | ENSMUSG00000001383 | 0.455569856  | 0.038347333 |
| <i>Cenpt</i>     | ENSMUSG00000036672 | 0.89209119   | 0.038347333 |
| <i>Mgst3</i>     | ENSMUSG00000026688 | -0.437911005 | 0.038393792 |
| <i>Itgax</i>     | ENSMUSG00000030789 | 1.66902535   | 0.038410518 |

|                 |                     |              |             |
|-----------------|---------------------|--------------|-------------|
| <i>Ift20</i>    | ENSMUSG00000001105  | 0.424861953  | 0.038414363 |
| <i>Gm43618</i>  | ENSMUSG00000105403  | -2.84332728  | 0.038546714 |
| <i>Gria3</i>    | ENSMUSG00000001986  | 0.964047317  | 0.038546714 |
| <i>Dhfr</i>     | ENSMUSG000000021707 | 0.792404947  | 0.038546714 |
| <i>Ncoa2</i>    | ENSMUSG000000005886 | -0.554719048 | 0.038556754 |
| <i>Slc25a37</i> | ENSMUSG000000034248 | -0.658758743 | 0.038556754 |
| <i>Atp6v0a2</i> | ENSMUSG000000038023 | -0.532485021 | 0.038624778 |
| <i>Fgf11</i>    | ENSMUSG000000042826 | -1.081057639 | 0.038692225 |
| <i>Mrps18a</i>  | ENSMUSG000000023967 | 0.411612007  | 0.038724585 |
| <i>Card10</i>   | ENSMUSG000000033170 | -0.601903817 | 0.038753449 |
| <i>Lvrn</i>     | ENSMUSG000000024481 | -1.760715048 | 0.038886588 |
| <i>Calhm5</i>   | ENSMUSG000000049872 | 0.991217418  | 0.038981854 |
| <i>Iqub</i>     | ENSMUSG000000046192 | -5.015882471 | 0.038981854 |
| <i>Slc2a12</i>  | ENSMUSG000000037490 | -1.048721908 | 0.038981854 |
| <i>Wdr35</i>    | ENSMUSG000000066643 | -0.612124352 | 0.039000508 |
| <i>Mxd4</i>     | ENSMUSG000000037235 | 0.484664813  | 0.039008643 |
| <i>Dnaja3</i>   | ENSMUSG000000004069 | -0.471316738 | 0.039008643 |
| <i>Esrrb</i>    | ENSMUSG000000021255 | -0.588411672 | 0.039008643 |
| <i>Pask</i>     | ENSMUSG000000026274 | 2.354314658  | 0.039011927 |
| <i>Ctsd</i>     | ENSMUSG000000007891 | 0.416512164  | 0.039041013 |
| <i>Ppp1r2</i>   | ENSMUSG000000047714 | 0.388720614  | 0.03904653  |
| <i>Cyhr1</i>    | ENSMUSG000000053929 | -0.414383885 | 0.039111631 |
| <i>Phf11a</i>   | ENSMUSG000000044703 | 1.790213308  | 0.039143586 |
| <i>Hnrnpf</i>   | ENSMUSG000000042079 | 0.479637239  | 0.039178092 |
| <i>Rsl1d1</i>   | ENSMUSG000000005846 | 0.492017742  | 0.039269768 |
| <i>Ubash3a</i>  | ENSMUSG000000042345 | 4.873372386  | 0.039280015 |
| <i>Mlxip</i>    | ENSMUSG000000038342 | -0.557898393 | 0.039308801 |
| <i>Clybl</i>    | ENSMUSG000000025545 | -0.451217292 | 0.03937964  |
| <i>Gm17066</i>  | ENSMUSG000000091509 | 0.942600366  | 0.039420816 |
| <i>Rab5b</i>    | ENSMUSG000000000711 | -0.442516514 | 0.039478381 |
| <i>Nckap5</i>   | ENSMUSG000000049690 | -1.155059298 | 0.039743574 |
| <i>U2af1</i>    | ENSMUSG000000061613 | 0.493765617  | 0.03974411  |
| <i>Zranb1</i>   | ENSMUSG000000030967 | 0.615247778  | 0.039754587 |
| <i>Lpin1</i>    | ENSMUSG000000020593 | -0.654112358 | 0.039802671 |
| <i>Cyb561d2</i> | ENSMUSG000000037190 | 0.679120245  | 0.039846745 |
| <i>Herc6</i>    | ENSMUSG000000029798 | 0.941029998  | 0.039846745 |
| <i>Ccdc146</i>  | ENSMUSG000000064280 | -1.012660634 | 0.039885094 |
| <i>mt-Th</i>    | ENSMUSG000000064364 | -3.424738485 | 0.03989479  |
| <i>Pacsin2</i>  | ENSMUSG000000016664 | -0.426747825 | 0.039905414 |
| <i>Afg1l</i>    | ENSMUSG000000038302 | -0.538935421 | 0.039909777 |

|                      |                    |              |             |
|----------------------|--------------------|--------------|-------------|
| <i>Tceal1</i>        | ENSMUSG00000049536 | -0.566504891 | 0.03991029  |
| <i>E2f2</i>          | ENSMUSG00000018983 | 1.449084522  | 0.039998043 |
| <i>Ace</i>           | ENSMUSG00000020681 | 0.572899063  | 0.039998043 |
| <i>Cops2</i>         | ENSMUSG00000027206 | 0.414414838  | 0.039998043 |
| <i>2900041M22Rik</i> | ENSMUSG00000054418 | 1.137512707  | 0.039998043 |
| <i>Fbn2</i>          | ENSMUSG00000024598 | 1.727887207  | 0.039998043 |
| <i>Slc12a2</i>       | ENSMUSG00000024597 | 0.582892727  | 0.040021882 |
| <i>Fam160a1</i>      | ENSMUSG00000051000 | -0.545929548 | 0.040040175 |
| <i>Ppp1r18</i>       | ENSMUSG00000034595 | 0.57659067   | 0.040040175 |
| <i>Sec61g</i>        | ENSMUSG00000078974 | 0.636307099  | 0.040060512 |
| <i>Igf2r</i>         | ENSMUSG00000023830 | -0.500979476 | 0.040079393 |
| <i>Gosr2</i>         | ENSMUSG00000020946 | 0.528983579  | 0.040079393 |
| <i>Rplp0</i>         | ENSMUSG00000067274 | 0.432432543  | 0.040079393 |
| <i>Kif18a</i>        | ENSMUSG00000027115 | 1.217995094  | 0.040079393 |
| <i>Sfpq</i>          | ENSMUSG00000028820 | 0.481128061  | 0.040095817 |
| <i>Casp8</i>         | ENSMUSG00000026029 | 0.61228695   | 0.040127353 |
| <i>AC133498.1</i>    | ENSMUSG00000114053 | -0.818165721 | 0.040127353 |
| <i>Idh3g</i>         | ENSMUSG00000002010 | -0.399941256 | 0.040127353 |
| <i>Gm16271</i>       | ENSMUSG00000089656 | -3.852665688 | 0.040127353 |
| <i>Col4a5</i>        | ENSMUSG00000031274 | 0.63121573   | 0.04012796  |
| <i>Gm8818</i>        | ENSMUSG00000079138 | 4.973507265  | 0.040132019 |
| <i>Gprasp2</i>       | ENSMUSG00000072966 | -1.474785687 | 0.040369737 |
| <i>Tbxa2r</i>        | ENSMUSG00000034881 | 1.170593336  | 0.040437232 |
| <i>Slc16a2</i>       | ENSMUSG00000033965 | -0.641897769 | 0.040503327 |
| <i>Mylip</i>         | ENSMUSG00000038175 | -0.566855601 | 0.040503327 |
| <i>Trim27</i>        | ENSMUSG00000021326 | 0.499413607  | 0.040550608 |
| <i>Pappa</i>         | ENSMUSG00000028370 | 1.666308374  | 0.040554573 |
| <i>9130401M01Rik</i> | ENSMUSG00000101892 | 0.687807566  | 0.040600409 |
| <i>Derl2</i>         | ENSMUSG00000018442 | 0.437649605  | 0.040642497 |
| <i>Rtcb</i>          | ENSMUSG00000001783 | 0.427368157  | 0.040668047 |
| <i>Klrk1</i>         | ENSMUSG00000030149 | 2.162851291  | 0.040668047 |
| <i>Pecr</i>          | ENSMUSG00000026189 | -0.642585086 | 0.040724303 |
| <i>Luzp2</i>         | ENSMUSG00000063297 | -5.028787081 | 0.04073791  |
| <i>Ift46</i>         | ENSMUSG00000002031 | 0.527581419  | 0.04073791  |
| <i>Actg2</i>         | ENSMUSG00000059430 | 1.756348133  | 0.040743994 |
| <i>Ednra</i>         | ENSMUSG00000031616 | -0.667798298 | 0.040831218 |
| <i>Smim15</i>        | ENSMUSG00000071180 | 0.49224689   | 0.040867021 |
| <i>Letm2</i>         | ENSMUSG00000037363 | -1.004269348 | 0.040867021 |
| <i>Ggt5</i>          | ENSMUSG00000006344 | -0.758929021 | 0.040867021 |
| <i>Dnajc4</i>        | ENSMUSG00000024963 | -0.432579024 | 0.040867021 |

|                      |                    |              |             |
|----------------------|--------------------|--------------|-------------|
| <i>Gm15535</i>       | ENSMUSG00000085527 | -2.364016377 | 0.040896202 |
| <i>Zfp174</i>        | ENSMUSG00000054939 | -2.004633577 | 0.040896202 |
| <i>Gm867</i>         | ENSMUSG00000050157 | 4.328957225  | 0.040898546 |
| <i>Agk</i>           | ENSMUSG00000029916 | -0.718453437 | 0.040898546 |
| <i>Dnajc5b</i>       | ENSMUSG00000027606 | -4.483485811 | 0.040898546 |
| <i>Dpp3</i>          | ENSMUSG00000063904 | 0.459983941  | 0.040898546 |
| <i>Gtf3c1</i>        | ENSMUSG00000032777 | -0.483239835 | 0.041021586 |
| <i>Zfp791</i>        | ENSMUSG00000074194 | -1.319929358 | 0.041025847 |
| <i>Cobl1l</i>        | ENSMUSG00000034903 | -0.557936317 | 0.041025847 |
| <i>Dhps</i>          | ENSMUSG00000060038 | 0.467538336  | 0.041025847 |
| <i>Plk5</i>          | ENSMUSG00000035486 | -2.037253522 | 0.041025847 |
| <i>Ddx6</i>          | ENSMUSG00000032097 | -0.434924509 | 0.041025847 |
| <i>Pbld1</i>         | ENSMUSG00000112129 | -5.028172184 | 0.041045212 |
| <i>Cers4</i>         | ENSMUSG00000008206 | -0.488219313 | 0.041103535 |
| <i>Cct7</i>          | ENSMUSG00000030007 | 0.446373308  | 0.041202343 |
| <i>Akr7a5</i>        | ENSMUSG00000028743 | -0.405396852 | 0.041202343 |
| <i>Snhg6</i>         | ENSMUSG00000098234 | 0.717690783  | 0.041332893 |
| <i>Klhl33</i>        | ENSMUSG00000090799 | -1.968077367 | 0.041332893 |
| <i>Ube2e3</i>        | ENSMUSG00000027011 | -0.458817705 | 0.04142081  |
| <i>Rhog</i>          | ENSMUSG00000073982 | 0.577248465  | 0.04150698  |
| <i>Atp6v0b</i>       | ENSMUSG00000033379 | 0.421737262  | 0.041568177 |
| <i>Spidr</i>         | ENSMUSG00000041974 | 0.919424913  | 0.041568177 |
| <i>Fabp3-ps1</i>     | ENSMUSG00000056366 | -0.569370586 | 0.041608062 |
| <i>Arhgef18</i>      | ENSMUSG00000004568 | -0.626784009 | 0.041641911 |
| <i>Scp2</i>          | ENSMUSG00000028603 | -0.461837649 | 0.041664175 |
| <i>Fxr2</i>          | ENSMUSG00000018765 | -0.397470446 | 0.041860039 |
| <i>1810021B22Rik</i> | ENSMUSG00000087331 | -1.196250419 | 0.041962464 |
| <i>Slc25a22</i>      | ENSMUSG00000019082 | -0.772550827 | 0.041984214 |
| <i>B430212C06Rik</i> | ENSMUSG00000046415 | -1.544517204 | 0.042003372 |
| <i>Slc22a5</i>       | ENSMUSG00000018900 | -0.592203145 | 0.042027017 |
| <i>Focad</i>         | ENSMUSG00000038368 | -0.776468474 | 0.042076493 |
| <i>Sirt4</i>         | ENSMUSG00000029524 | -0.715551364 | 0.04208669  |
| <i>Gm29560</i>       | ENSMUSG00000101641 | -3.486638852 | 0.042092957 |
| <i>4930458D05Rik</i> | ENSMUSG00000087611 | -1.555589037 | 0.042110586 |
| <i>Gm7665</i>        | ENSMUSG00000063628 | 1.224040127  | 0.042110586 |
| <i>Casz1</i>         | ENSMUSG00000028977 | -0.766583679 | 0.042110586 |
| <i>Smim24</i>        | ENSMUSG00000078439 | -1.061267557 | 0.04232472  |
| <i>Emc8</i>          | ENSMUSG00000031819 | 0.474768301  | 0.042325291 |
| <i>Scn5a</i>         | ENSMUSG00000032511 | -0.619047764 | 0.042343158 |
| <i>Phf11b</i>        | ENSMUSG00000091649 | 0.769284478  | 0.042381904 |

|                  |                    |              |             |
|------------------|--------------------|--------------|-------------|
| <i>Map10</i>     | ENSMUSG00000050930 | -0.858621879 | 0.042432114 |
| <i>Pick1</i>     | ENSMUSG00000068206 | -0.821118431 | 0.042544783 |
| <i>Fbxl17</i>    | ENSMUSG00000023965 | -0.498404897 | 0.042845873 |
| <i>Runx1t1</i>   | ENSMUSG00000006586 | -1.20978313  | 0.0428772   |
| <i>Fam241b</i>   | ENSMUSG00000020083 | -0.971371082 | 0.043021152 |
| <i>Axl</i>       | ENSMUSG00000002602 | 0.476305723  | 0.043028626 |
| <i>Myo9b</i>     | ENSMUSG00000004677 | 0.552244025  | 0.043038653 |
| <i>Pgf</i>       | ENSMUSG00000004791 | -0.755965092 | 0.043038653 |
| <i>Surf4</i>     | ENSMUSG00000014867 | 0.438558339  | 0.043150213 |
| <i>Hcst</i>      | ENSMUSG00000064109 | 1.671785951  | 0.043257596 |
| <i>Fry</i>       | ENSMUSG00000056602 | -0.618819738 | 0.04325837  |
| <i>Hint3</i>     | ENSMUSG00000019791 | -0.431788196 | 0.043355728 |
| <i>Acyl</i>      | ENSMUSG00000023262 | -0.632114313 | 0.043467147 |
| <i>Rpl35</i>     | ENSMUSG00000062997 | 0.621961001  | 0.043467147 |
| <i>Nsd1</i>      | ENSMUSG00000021488 | -0.525150091 | 0.043478253 |
| <i>Csnk1a1</i>   | ENSMUSG00000024576 | 0.391855775  | 0.043486376 |
| <i>Sema3a</i>    | ENSMUSG00000028883 | 1.073037221  | 0.043575237 |
| <i>Il17rc</i>    | ENSMUSG00000030281 | 0.62963595   | 0.043671971 |
| <i>Gm36670</i>   | ENSMUSG00000109696 | -1.29567791  | 0.04368179  |
| <i>Adam8</i>     | ENSMUSG00000025473 | 1.369723371  | 0.04385619  |
| <i>Eme1</i>      | ENSMUSG00000039055 | 2.896387439  | 0.04385619  |
| <i>Chmp2b</i>    | ENSMUSG00000004843 | 0.412042139  | 0.04385619  |
| <i>Kansl1</i>    | ENSMUSG00000018412 | -0.60491103  | 0.043872808 |
| <i>Fkbp8</i>     | ENSMUSG00000019428 | 0.389191384  | 0.043887614 |
| <i>Kif5c</i>     | ENSMUSG00000026764 | 1.419702276  | 0.043909149 |
| <i>Serpina3h</i> | ENSMUSG00000041449 | 2.318606543  | 0.043937626 |
| <i>Eif3e</i>     | ENSMUSG00000022336 | 0.444032228  | 0.043981334 |
| <i>Apoo</i>      | ENSMUSG00000079508 | -0.402928987 | 0.044082054 |
| <i>Rps27l</i>    | ENSMUSG00000036781 | 0.485414433  | 0.044082054 |
| <i>Usp1</i>      | ENSMUSG00000028560 | 0.473572006  | 0.044193112 |
| <i>mt-Ts2</i>    | ENSMUSG00000064365 | -2.905944092 | 0.044193112 |
| <i>Synrg</i>     | ENSMUSG00000034940 | -0.650602319 | 0.044193112 |
| <i>Malat1</i>    | ENSMUSG00000092341 | -1.500169786 | 0.044223234 |
| <i>Gm49172</i>   | ENSMUSG00000115049 | 0.840610648  | 0.044223411 |
| <i>Nedd4</i>     | ENSMUSG00000032216 | -0.416615293 | 0.04429857  |
| <i>Klc1</i>      | ENSMUSG00000021288 | 0.437982038  | 0.04429857  |
| <i>Gm14261</i>   | ENSMUSG00000085322 | -0.962253954 | 0.044301639 |
| <i>Zfp991</i>    | ENSMUSG00000067916 | 0.676200251  | 0.044425386 |
| <i>Ylpm1</i>     | ENSMUSG00000021244 | -0.629008166 | 0.044425386 |
| <i>Hsp25-ps1</i> | ENSMUSG00000078915 | 2.321795153  | 0.044506612 |



|                      |                    |              |             |
|----------------------|--------------------|--------------|-------------|
| <i>Gfer</i>          | ENSMUSG00000040888 | 0.473841337  | 0.044506612 |
| <i>Fam117a</i>       | ENSMUSG00000038893 | -0.719109684 | 0.044553424 |
| <i>Sell13</i>        | ENSMUSG00000029189 | -2.185951162 | 0.044647792 |
| <i>Ptms</i>          | ENSMUSG00000030122 | 0.566642362  | 0.044816191 |
| <i>Gm30556</i>       | ENSMUSG00000115180 | -1.394431645 | 0.044816191 |
| <i>Ppard</i>         | ENSMUSG00000002250 | -0.550850217 | 0.044845757 |
| <i>Cenpn</i>         | ENSMUSG00000031756 | 1.476289358  | 0.044913614 |
| <i>Pygo1</i>         | ENSMUSG00000034910 | -0.723130472 | 0.044969079 |
| <i>Stard9</i>        | ENSMUSG00000033705 | -0.873728501 | 0.044969079 |
| <i>Dgkeos</i>        | ENSMUSG00000063109 | -2.330569862 | 0.044987364 |
| <i>Aimp2</i>         | ENSMUSG00000029610 | 0.51650305   | 0.045002719 |
| <i>Clgalt1c1</i>     | ENSMUSG00000048970 | 0.59498469   | 0.045084771 |
| <i>Hoxd8</i>         | ENSMUSG00000027102 | 1.253581896  | 0.04512603  |
| <i>Mgll</i>          | ENSMUSG00000033174 | 0.582787898  | 0.04512603  |
| <i>4930452B06Rik</i> | ENSMUSG00000021747 | -1.167256195 | 0.045159314 |
| <i>Chmp2a</i>        | ENSMUSG00000033916 | 0.380701038  | 0.045276262 |
| <i>Celsr2</i>        | ENSMUSG00000068740 | -1.770525975 | 0.045276262 |
| <i>Pon2</i>          | ENSMUSG00000032667 | 0.477440836  | 0.045293569 |
| <i>Lypd2</i>         | ENSMUSG00000022595 | -1.357829253 | 0.045329388 |
| <i>Tnik</i>          | ENSMUSG00000027692 | -0.670417475 | 0.045394695 |
| <i>Arhgap21</i>      | ENSMUSG00000036591 | -0.636531661 | 0.045524959 |
| <i>Stard7</i>        | ENSMUSG00000027367 | -0.501716205 | 0.045573456 |
| <i>Crb2</i>          | ENSMUSG00000035403 | -1.74101755  | 0.045573456 |
| <i>Vnn1</i>          | ENSMUSG00000037440 | -2.117081585 | 0.045575973 |
| <i>Rsrc1</i>         | ENSMUSG00000034544 | 0.491837627  | 0.045592773 |
| <i>Cct4</i>          | ENSMUSG00000007739 | 0.417557754  | 0.045630816 |
| <i>Sp1</i>           | ENSMUSG00000001280 | -0.554678287 | 0.045630816 |
| <i>Gm43813</i>       | ENSMUSG00000106636 | 4.406499603  | 0.045648999 |
| <i>Vav1</i>          | ENSMUSG00000034116 | 0.686742435  | 0.045660585 |
| <i>Tmem106b</i>      | ENSMUSG00000029571 | -0.398408027 | 0.045712252 |
| <i>Gm11431</i>       | ENSMUSG00000087407 | -4.928938293 | 0.045726336 |
| <i>Npm3</i>          | ENSMUSG00000056209 | 0.497681278  | 0.045765533 |
| <i>Rdh14</i>         | ENSMUSG00000020621 | -0.49757455  | 0.045768969 |
| <i>Matr3</i>         | ENSMUSG00000037236 | 0.403652732  | 0.045823212 |
| <i>Dsn1</i>          | ENSMUSG00000027635 | 1.077071619  | 0.045823212 |
| <i>Tpsb2</i>         | ENSMUSG00000033825 | 0.941401699  | 0.045908756 |
| <i>Rps27</i>         | ENSMUSG00000090733 | 0.687856195  | 0.045963356 |
| <i>Dock3</i>         | ENSMUSG00000039716 | -4.980194835 | 0.04607839  |
| <i>Cxxc5</i>         | ENSMUSG00000046668 | -0.535139297 | 0.046120832 |
| <i>Eya1</i>          | ENSMUSG00000025932 | -1.986444569 | 0.046134647 |

|                      |                    |              |             |
|----------------------|--------------------|--------------|-------------|
| <i>Gm4924</i>        | ENSMUSG00000073427 | 1.398242619  | 0.046136658 |
| <i>Stk3</i>          | ENSMUSG00000022329 | 0.649834007  | 0.046145342 |
| <i>Faap24</i>        | ENSMUSG00000030493 | 0.982011757  | 0.046348342 |
| <i>Pard6a</i>        | ENSMUSG00000005699 | 0.607347747  | 0.046382702 |
| <i>Ptov1</i>         | ENSMUSG00000038502 | -0.409981233 | 0.046415031 |
| <i>Mks1</i>          | ENSMUSG00000034121 | -1.194966464 | 0.046433828 |
| <i>Sec16a</i>        | ENSMUSG00000026924 | -0.599162852 | 0.046439095 |
| <i>Rnf167</i>        | ENSMUSG00000040746 | -0.482114033 | 0.046439095 |
| <i>Bzw2</i>          | ENSMUSG00000020547 | -0.499964782 | 0.046439095 |
| <i>Lrrn2</i>         | ENSMUSG00000026443 | 0.907637001  | 0.046481339 |
| <i>Ptpa</i>          | ENSMUSG00000039515 | 0.399158227  | 0.046575037 |
| <i>Ano8</i>          | ENSMUSG00000034863 | -0.68888599  | 0.046575037 |
| <i>Tor1a</i>         | ENSMUSG00000026849 | 0.543656173  | 0.046575037 |
| <i>Extl1</i>         | ENSMUSG00000028838 | -0.73974013  | 0.046575037 |
| <i>Stt3b</i>         | ENSMUSG00000032437 | 0.451912959  | 0.046642207 |
| <i>Gm26772</i>       | ENSMUSG00000097136 | 4.270436556  | 0.0467834   |
| <i>Mrps24</i>        | ENSMUSG00000020477 | -0.416259501 | 0.0467834   |
| <i>Arhgap28</i>      | ENSMUSG00000024043 | -1.111424494 | 0.046833514 |
| <i>Pter</i>          | ENSMUSG00000026730 | -0.595796011 | 0.046886549 |
| <i>Cbr4</i>          | ENSMUSG00000031641 | -0.476591873 | 0.046886549 |
| <i>Ndufa3</i>        | ENSMUSG00000035674 | -0.658293158 | 0.047002519 |
| <i>Stradb</i>        | ENSMUSG00000026027 | -0.426895867 | 0.047018098 |
| <i>Cpn2</i>          | ENSMUSG00000023176 | -2.717262793 | 0.047060913 |
| <i>Usp16</i>         | ENSMUSG00000025616 | 0.442209293  | 0.047149416 |
| <i>Gmds</i>          | ENSMUSG00000038372 | 0.656626083  | 0.047236054 |
| <i>Atp6v0d2</i>      | ENSMUSG00000028238 | 2.022723207  | 0.047319377 |
| <i>Ypel2</i>         | ENSMUSG00000018427 | -0.776638498 | 0.047364103 |
| <i>Taz</i>           | ENSMUSG00000009995 | -0.590295361 | 0.047584894 |
| <i>Pdcd1</i>         | ENSMUSG00000026285 | 3.31146943   | 0.047606499 |
| <i>Rnf126</i>        | ENSMUSG00000035890 | 0.451202605  | 0.047633914 |
| <i>Plbd1</i>         | ENSMUSG00000030214 | -0.48954994  | 0.047642049 |
| <i>Hipk3</i>         | ENSMUSG00000027177 | -0.499909971 | 0.04775647  |
| <i>Cyp2b10</i>       | ENSMUSG00000030483 | -2.566054262 | 0.047803543 |
| <i>Tap1</i>          | ENSMUSG00000037321 | 0.677978139  | 0.047856875 |
| <i>Gm3756</i>        | ENSMUSG00000091639 | 0.944740722  | 0.047856875 |
| <i>Afg3l2</i>        | ENSMUSG00000024527 | 0.498997983  | 0.047878496 |
| <i>Mrpl41</i>        | ENSMUSG00000036850 | -0.56024256  | 0.047888742 |
| <i>D530033B14Rik</i> | ENSMUSG00000108332 | -2.299176488 | 0.047915341 |
| <i>Ddias</i>         | ENSMUSG00000030641 | 1.579804848  | 0.048018762 |
| <i>Tcf24</i>         | ENSMUSG00000099032 | 1.670876257  | 0.048048933 |

|                      |                    |              |             |
|----------------------|--------------------|--------------|-------------|
| <i>Irf4</i>          | ENSMUSG00000021356 | -1.349359345 | 0.048229004 |
| <i>Gm7658</i>        | ENSMUSG00000082935 | 0.68756525   | 0.048329826 |
| <i>Apex2</i>         | ENSMUSG00000025269 | -0.859199035 | 0.048357925 |
| <i>Zcchc3</i>        | ENSMUSG00000074682 | -0.648259563 | 0.048357925 |
| <i>Gm49085</i>       | ENSMUSG00000115249 | 4.84378008   | 0.048357925 |
| <i>Lrfn4</i>         | ENSMUSG00000045045 | -0.672375481 | 0.048357925 |
| <i>Arhgef15</i>      | ENSMUSG00000052921 | -0.598167365 | 0.048357925 |
| <i>Ahcy</i>          | ENSMUSG00000027597 | 0.50176959   | 0.048406242 |
| <i>Ppp1r14b</i>      | ENSMUSG00000056612 | 0.452252991  | 0.048415832 |
| <i>Rcc1</i>          | ENSMUSG00000028896 | 0.701587698  | 0.048607252 |
| <i>Akt3</i>          | ENSMUSG00000019699 | 0.548118551  | 0.048656755 |
| <i>Smyd1</i>         | ENSMUSG00000055027 | -0.473759606 | 0.048656755 |
| <i>Eif4a2</i>        | ENSMUSG00000022884 | -0.475884366 | 0.048739275 |
| <i>Otub1</i>         | ENSMUSG00000024767 | 0.43891953   | 0.048905268 |
| <i>Crocc</i>         | ENSMUSG00000040860 | -1.207012571 | 0.048929945 |
| <i>Cmtm3</i>         | ENSMUSG00000031875 | 0.514788365  | 0.048940846 |
| <i>Ecsit</i>         | ENSMUSG00000066839 | -0.472868588 | 0.048993674 |
| <i>Rnf123</i>        | ENSMUSG00000041528 | -0.535671253 | 0.049035111 |
| <i>Rexo1</i>         | ENSMUSG00000047417 | -0.634737333 | 0.049157274 |
| <i>Sncaip</i>        | ENSMUSG00000024534 | -0.67538239  | 0.049253706 |
| <i>Dcaf10</i>        | ENSMUSG00000035572 | 0.58597458   | 0.049315745 |
| <i>Ttc39a</i>        | ENSMUSG00000028555 | -1.664958798 | 0.049315745 |
| <i>Gm15956</i>       | ENSMUSG00000086935 | -3.081867457 | 0.049315745 |
| <i>Chd2</i>          | ENSMUSG00000078671 | -0.643361951 | 0.049315745 |
| <i>Fam83e</i>        | ENSMUSG00000054161 | -4.890735554 | 0.049318177 |
| <i>Nop16</i>         | ENSMUSG00000025869 | 0.537900196  | 0.049374178 |
| <i>9430091E24Rik</i> | ENSMUSG00000084808 | -1.084782866 | 0.049384338 |
| <i>Plekhhl1</i>      | ENSMUSG00000060716 | -2.90819733  | 0.049404902 |
| <i>Fcer1g</i>        | ENSMUSG00000058715 | 0.590833054  | 0.049428388 |
| <i>Pa2g4</i>         | ENSMUSG00000025364 | 0.437290551  | 0.049459502 |
| <i>Orai2</i>         | ENSMUSG00000039747 | 1.357157626  | 0.049494745 |
| <i>Tbl3</i>          | ENSMUSG00000040688 | 0.575598944  | 0.049702161 |
| <i>Mrpl39</i>        | ENSMUSG00000022889 | -0.453209028 | 0.049710398 |
| <i>Cebpzos</i>       | ENSMUSG00000062691 | -0.669999705 | 0.049710398 |
| <i>Klhl2</i>         | ENSMUSG00000031605 | 0.609737655  | 0.049774062 |
| <i>Gm11585</i>       | ENSMUSG00000082045 | 0.795593916  | 0.049787429 |
| <i>A430033K04Rik</i> | ENSMUSG00000056014 | -1.027424618 | 0.049787429 |
| <i>Rasl10a</i>       | ENSMUSG00000034209 | -1.066672085 | 0.049787429 |
| <i>6030458C11Rik</i> | ENSMUSG00000022195 | -0.550979979 | 0.049885014 |
| <i>C330013E15Rik</i> | ENSMUSG00000097093 | -1.477784995 | 0.049932095 |

1

2 **Figure S1. Expression abundance of SLC40A1 in different tissues of mice.**

3 (A) Western blot analysis of SLC40A1 expression in wild-type mice's heart, liver, spleen, lung, kidney, and small intestine,  
4 normalized to  $\beta$ -actin. The data is presented as the mean value plus or minus the standard error of the mean (n = 4).

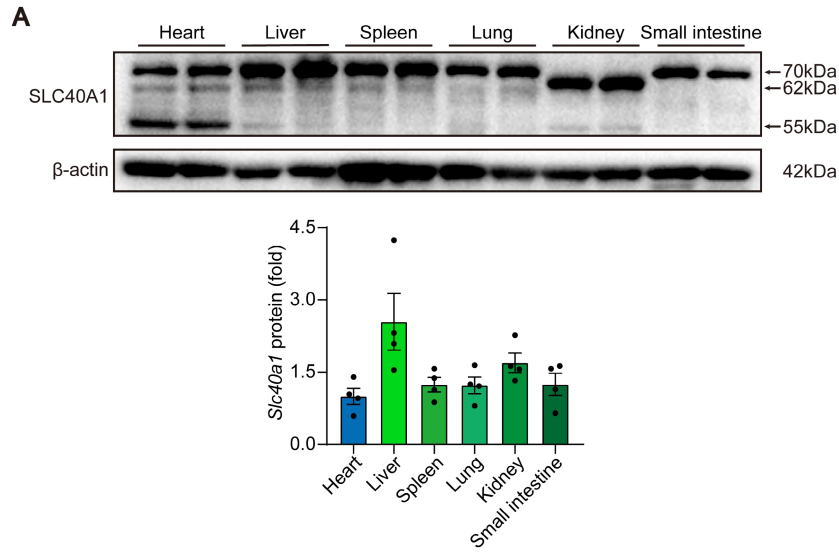

5

6

7 **Figure S2. Identification of mice genotypes.**

8 (A) The genotypes of Rosa26-LSL (LoxP-Stop-LoxP)-*Slc40a1* and *Myh6*-Cre were determined using PCR and gel  
9 electrophoresis. WT, wild type; MT, mutant.

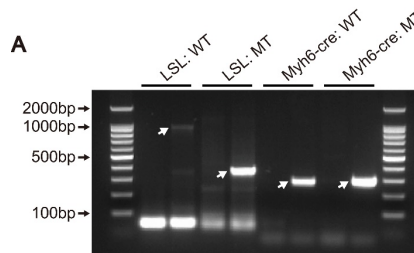

10

11

12 **Figure S3. Increased heart weight in TG mice.**

13 (A) Measurements of body weight and heart/body weight ratios were taken for both TG and NTG mice. The data is  
14 presented as the mean value plus or minus the standard error of the mean (n = 8). The data is presented as the mean value  
15 plus or minus the standard error of the mean. Statistical significance is denoted by \*p < 0.05.

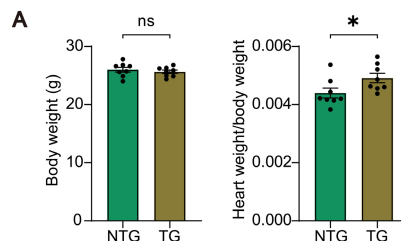

16

17

18 **Figure S4. There were notable alterations observed in various pathways that are closely linked to mitochondrial  
19 function, ROS production, and apoptosis in TG mice.**

20 (A) GO analysis was conducted to identify up- and down-regulated pathways in the hearts of TG mice compared to NTG

1 mice. The top 10 pathways in the biological process, cellular component, and molecular function classifications are  
 2 presented.

A

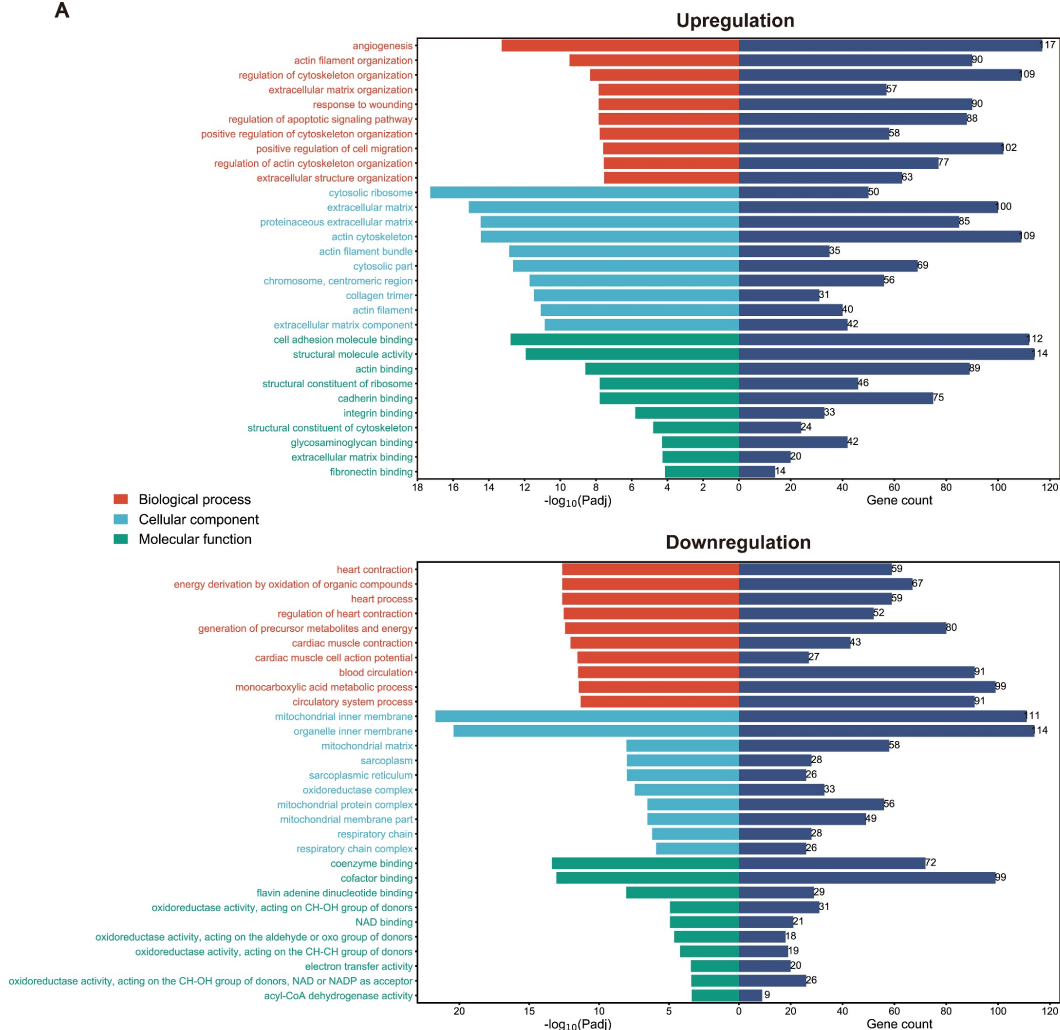

3  
 4  
 5 **Figure S5. There was an absence of substantial alteration in the myocardial expression of crucial genes associated**  
 6 **with ferroptosis in TG mice.**

7 (A) The mRNA sequencing results revealed no differential expression of myocardial *Gpx4*, *Acs14*, *Slc7a11*, *Alox15*,  
 8 *Coq10a*, *Coq10b*, and *Ncoa4* in TG mice compared to NTG mice (n = 3). (B) Western blot analysis of *Gpx4* expression  
 9 of myocardial in TG mice compared to NTG mice. The data is presented as the mean value plus or minus the standard  
 10 error of the mean (n = 4).

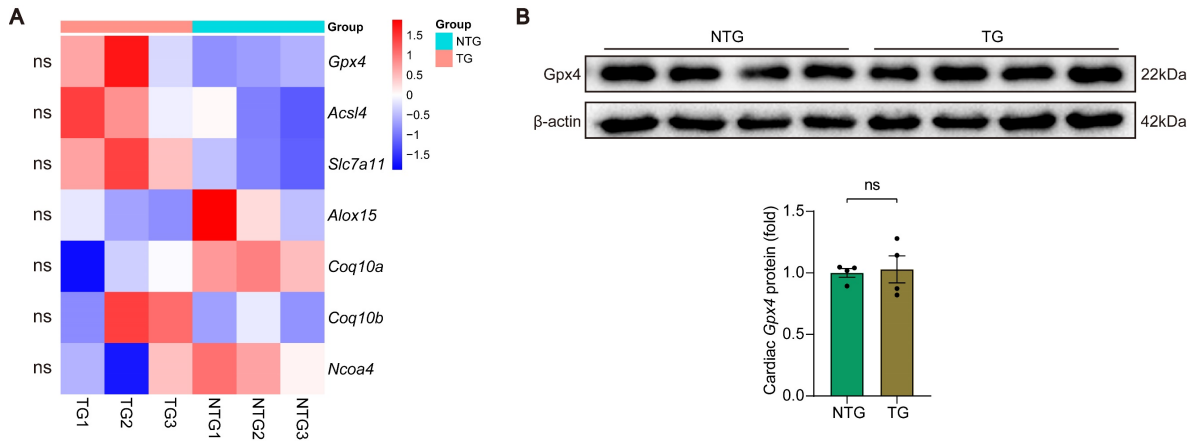

1  
2

**Figure S6. The effectiveness of SLC40A1 overexpression was assessed.**

3  
4 (A) NRMCs *Slc40a1* protein was measured using western blot analysis, normalized to  $\beta$ -actin (n = 3). The data is presented  
5 as the mean value plus or minus the standard error of the mean. Statistical significance is denoted by \*\*p < 0.01.

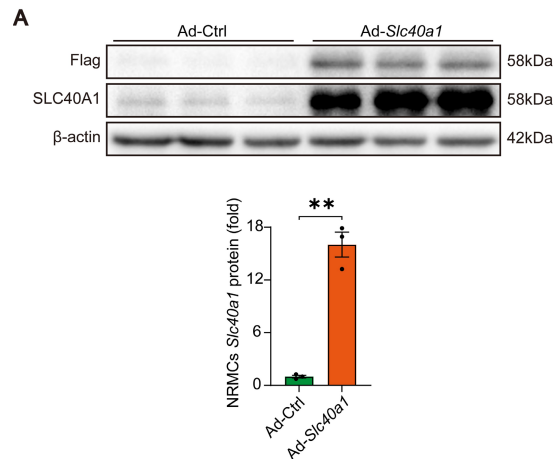

6  
7

**Figure S7. *Slc40a1* were up-regulated in human heart with heart failure.**

8  
9 (A) *Slc40a1* mRNA levels in the heart samples of non-failing (NF) subjects (n = 15) and dilated cardiomyopathy (DCM)  
10 patients (n = 13) based on RNA-seq data. (B) *Slc40a1* mRNA levels in the heart samples of non-failing (NF) subjects (n =  
11), idiopathic dilated cardiomyopathy (IDC) patients (n = 15), and ischemic cardiomyopathy (ICM) patients (n = 11). The  
12 data is presented as the mean value plus or minus the standard error of the mean. Statistical significance is denoted by \*p  
13 < 0.05 and \*\*p < 0.01.

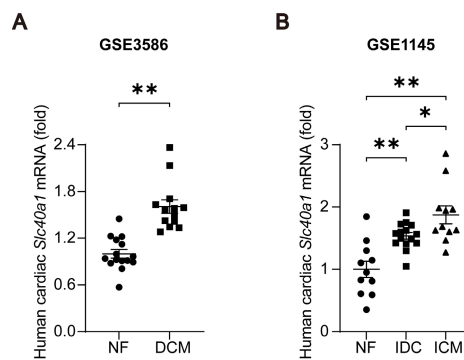

14  
15

**Figure S8. The effectiveness of SLC40A1 knock-down was assessed.**

1 (A) NRMCs *Slc40a1* protein was measured using western blot analysis, normalized to  $\beta$ -actin (n = 3). We used Ad-  
2 *shSlc40a1-3* for further research. The data is presented as the mean value plus or minus the standard error of the mean.  
3 Statistical significance is denoted by \* $p < 0.05$  and \*\* $p < 0.01$ .

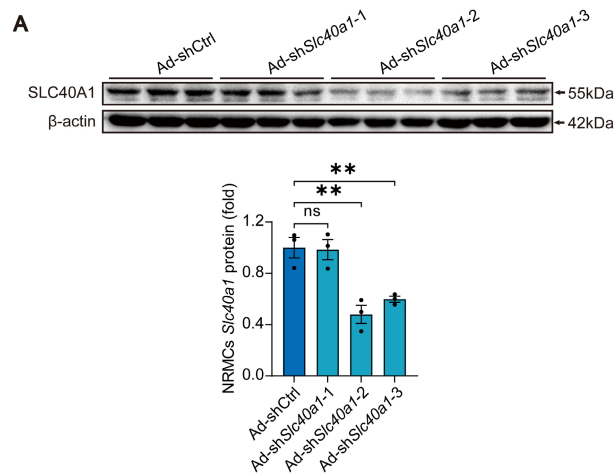

4

5

6

7 **Figure S9. Knockdown of Steap4 in cardiomyocytes resulted in improved mitochondrial morphology, inhibition of**  
8 **NADPH content decrease, and reduced apoptosis in TG mice.**

9 (A) Electron micrographs of heart tissue illustrate the morphology of mitochondria. (B) Cardiac NADPH content was  
10 measured (n = 5). (C) Mouse hearts were stained with TUNEL (red) and DAPI (blue) in order to detect apoptotic cells (n  
11 = 4). TUNEL positive nuclei are quantified. The data is presented as the mean value plus or minus the standard error of  
12 the mean. Statistical significance is denoted by \* $p < 0.05$  and \*\* $p < 0.01$ .

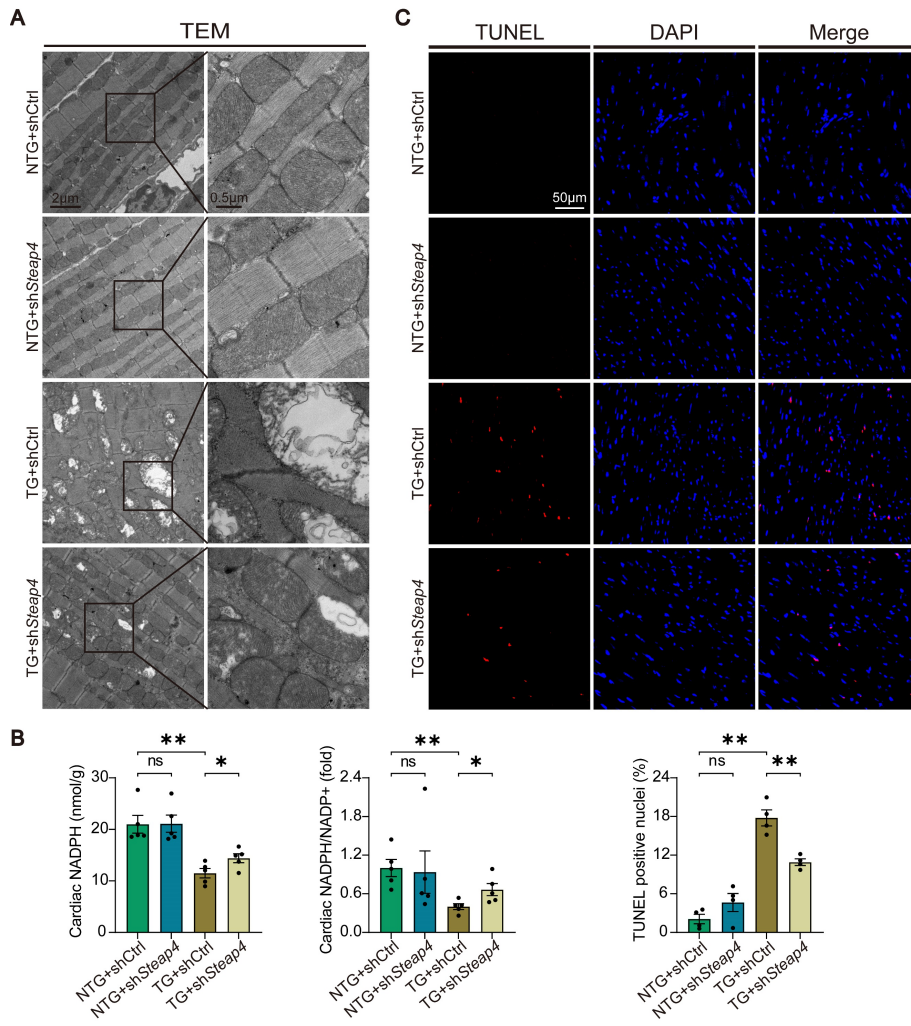

Supplement: ijbsv20p0414s1.pdf [file ijbsv20p0414s1.pdf]
